# Supplementary material for: Where to buy OTC medications? A cross-sectional survey investigating consumers’ confidence in over-the-counter (OTC) skills and their attitudes towards the availability of OTC painkillers
Source: PubMed Central journal article supplement — BMJ Open. 2013 Sep 25;3(9):e003455. doi: 10.1136/bmjopen-2013-003455 (PMC3787475; doi:10.1136/bmjopen-2013-003455), 2013-09-25
Supplement: bmjopen-2013-003455.draft_revisions.pdf [file bmjopen-2013-003455.draft_revisions.pdf]

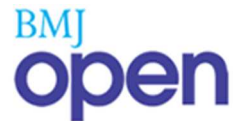

**WHERE TO BUY OTC MEDICATIONS?  
A cross-sectional survey investigating consumers' confidence in over-the-counter (OTC) skills and their attitudes towards the availability of OTC analgesics.**

|                                 |                                                                                                                                                                                                                                                                                                                                                                                                                              |
|---------------------------------|------------------------------------------------------------------------------------------------------------------------------------------------------------------------------------------------------------------------------------------------------------------------------------------------------------------------------------------------------------------------------------------------------------------------------|
| Journal:                        | <i>BMJ Open</i>                                                                                                                                                                                                                                                                                                                                                                                                              |
| Manuscript ID:                  | bmjopen-2013-003455                                                                                                                                                                                                                                                                                                                                                                                                          |
| Article Type:                   | Research                                                                                                                                                                                                                                                                                                                                                                                                                     |
| Date Submitted by the Author:   | 21-Jun-2013                                                                                                                                                                                                                                                                                                                                                                                                                  |
| Complete List of Authors:       | Brabers, Anne; NIVEL Netherlands institute for health services research, van Dijk, Liset; NIVEL Netherlands institute for health services research, Bouvy, Marcel; Utrecht Institute for Pharmaceutical Sciences, Utrecht University, Division of Pharmacoepidemiology and Clinical Pharmacology; SIR Institute for Pharmacy Practice and Policy, De Jong, Judith; NIVEL Netherlands institute for health services research, |
| <b>Primary Subject Heading</b>: | Health services research                                                                                                                                                                                                                                                                                                                                                                                                     |
| Secondary Subject Heading:      | Health policy                                                                                                                                                                                                                                                                                                                                                                                                                |
| Keywords:                       | Health & safety < HEALTH SERVICES ADMINISTRATION & MANAGEMENT, Health policy < HEALTH SERVICES ADMINISTRATION & MANAGEMENT, Organisation of health services < HEALTH SERVICES ADMINISTRATION & MANAGEMENT                                                                                                                                                                                                                    |
|                                 |                                                                                                                                                                                                                                                                                                                                                                                                                              |

SCHOLARONE™  
Manuscripts

only

## WHERE TO BUY OTC MEDICATIONS?

**A cross-sectional survey investigating consumers' confidence in over-the-counter (OTC) skills and their attitudes towards the availability of OTC analgesics.**

Brabers AEM<sup>1§</sup>, Van Dijk L<sup>1</sup>, Bouvy ML<sup>23</sup>, De Jong JD<sup>1</sup>

<sup>1</sup> NIVEL, Netherlands Institute for Health Services Research, PO Box 1568, 3500 BN Utrecht, the Netherlands

<sup>2</sup> Division Pharmacoepidemiology & Clinical Pharmacology, Utrecht Institute for Pharmaceutical Sciences (UIPS), PO Box 80082, 3500 TB Utrecht, the Netherlands

<sup>3</sup> SIR Institute for Pharmacy Practice and Policy, Theda Mansholtstraat 5b, 2331 JE Leiden, the Netherlands

§ Corresponding author

Contact address corresponding author:

PO Box 1568, 3500 BN Utrecht, the Netherlands

Email addresses:

AB: [a.brabers@nivel.nl](mailto:a.brabers@nivel.nl)

LVD: [l.vandijk@nivel.nl](mailto:l.vandijk@nivel.nl)

MB: [m.l.bouvy@uu.nl](mailto:m.l.bouvy@uu.nl)

JDJ: [j.dejong@nivel.nl](mailto:j.dejong@nivel.nl)

Main work positions:

AB: Junior researcher NIVEL

LVD: Programme co-ordinator NIVEL

MB: Professor of Pharmaceutical Care, Division of Pharmacoepidemiology & Clinical Pharmacology, Utrecht Institute for Pharmaceutical Sciences (UIPS)

JDJ: Programme co-ordinator NIVEL

**ABSTRACT**

**Objective:** To examine consumers' confidence in their own, and also in other people's, over-the-counter (OTC) skills and to look too at their attitudes towards the availability of OTC analgesics. Moreover we examined the association between confidence in OTC skills and attitudes.

**Design:** Cross-sectional survey. Mixed-mode questionnaire.

**Participants:** Members of the Dutch Health Care Consumer Panel of whom 972 returned the questionnaire (response 68%).

**Main outcome measures:** Consumers' confidence in their own, and in other people's, OTC skills was examined. This is because, generally, people are roughly accurate when estimating peers' attitudes and behaviours. Confidence was measured by three questions regarding obtaining information on, choosing, and using OTC medication. Consumers' attitudes towards availability were assessed using six safety profiles. Respondents had to indicate which channel they prefer for each profile.

**Results:** Consumers feel confident about their own OTC skills (mean 3.74; 95% CI 3.69 to 3.79, on a 5-point Likert scale), but have less confidence in OTC skills of others (mean 2.92; 95% CI 2.88 to 2.96). Consumers are conservative in their attitudes towards the availability of OTC analgesics. Most consumers prefer analgesics to be available exclusively in pharmacies (41 to 71% per profile indicated pharmacy only). Moreover, there is an association between confidence in OTC skills and attitudes ( $p=0.003$ ;  $\beta=-0.115$ ). Consumers who are more confident about their own OTC skills prefer OTC analgesics to be more generally available.

**Conclusions:** Consumers feel confident about their own OTC skills. However, they would prefer analgesics with safety profiles resembling those currently available OTC, to be available as OTC in pharmacies exclusively. Consumers' confidence in the OTC skills of others is more consistent with their attitudes towards availability of OTC analgesics. Until consumers themselves realise they are also one of the others, they may overestimate their own OTC skills, which may entail health risks.

## Article summary

### Article focus

- Several studies have observed that consumers appear to be unaware of how to use OTC medications appropriately, which may entail health risks.
- Until now little is known about consumers' confidence in their own and other people's OTC skills and their attitudes towards the availability of OTC analgesics.
- This study aimed to examine consumers' confidence in their own, and also in other people's, OTC skills, to look too at their attitudes towards the availability of OTC analgesics, and to examine the association between confidence in OTC skills and attitudes.

### Key messages

- Consumers feel confident about their own OTC skills. However, they would prefer that analgesics with safety profiles resembling those currently available OTC, to be available as OTC in pharmacies exclusively.
- Consumers have less confidence in the OTC skills of others. This perception is more consistent with their attitudes towards availability of OTC analgesics.
- Until consumers themselves realise they are also one of the others, they may overestimate their own OTC skills, which may entail health risks.

### Strengths and limitations of this study

- Strengths include the large sample size and the response rate of almost 70% and the inclusion of an indirect measurement of the concept 'attitudes towards availability' in our questionnaire instead of asking directly where certain specific OTC analgesics should be available.
- Limitations include not being able to make a comparison between a direct as well as indirect measurements and not being able to link our results to the actual self-medication behaviour of the respondents, since we do not know what they do and buy.

## BACKGROUND

The need to save on health care spending has led to more emphasis on patients taking their own responsibility for the management of minor ailments, including the use of medication that is available without a prescription<sup>1,2</sup>.

However, inappropriate use of OTC medications entails considerable health risks. Several studies demonstrated that inappropriate use results in drug intoxication, drug interactions, side effects and increased health care costs as a consequence of extra visits to a doctor and hospitalization<sup>3-7</sup>. Nevertheless, in many countries, increasingly more drugs that were previously only available on prescription are being switched to OTC status<sup>2,8,9</sup>. A study of the US Government Accountability Office conducted in the UK, the USA, the Netherlands, Italy and Australia, showed that since 1995 all these countries have increased OTC availability. This is due either to changes in the classification of non-prescription drugs or to the reclassification of medications into less restrictive classes<sup>10</sup>.

In the Netherlands, the availability of OTC drugs increased when the Dutch government changed the system for OTC medications. Since the introduction of the Medicines Act on 1 July 2007, three categories of non-prescription drugs have been specified: 1) pharmacy only; 2) pharmacy only and chemist; and 3) general sales<sup>11</sup>. Before July 2007, the third category did not exist. In the Netherlands, there is a distinction between pharmacies and chemists. Pharmacies are run by a pharmacist and able to sell all prescription and non-prescription drugs, while chemists are run by a druggist, who requires less training than a pharmacist and is able to sell many but not all non-prescription drugs<sup>10</sup>. When introducing the new legislation, the Dutch government argued that consumers are well-informed and know how to use OTC drugs appropriately<sup>11,12</sup>. This assumption was not supported by international literature. Earlier research, mainly focused on analgesics, observed that consumers appear to be unaware of how to use OTC medications appropriately<sup>4-6,13-16</sup>.

There has been little research conducted into how consumers themselves perceive their skills in using OTC medications appropriately. It is important to gain some insight into areas such as overestimating OTC skills as this may result in risks to health. The purpose of the present study was to examine consumers' confidence in OTC skills. We examined consumers' confidence, both in their own OTC skills, and in those of others. This is because previous research has shown that "people tend to think positively of themselves, often to unrealistic degrees"<sup>17</sup>. Moreover, the literature demonstrated that consumers' estimates of their peers' attitudes and behaviours tend to be roughly accurate<sup>17</sup>. Furthermore, we examined which channels consumers prefer with regard to the availability of OTC analgesics. Finally, we examined the association between consumers' confidence in OTC skills and their

1 attitudes towards the availability of OTC analgesics, as we expected that more confident consumers prefer them to  
2  
3 be more generally available.  
4  
5

## 6 7 **METHODS**

### 8 9 **Setting**

10 Data were collected in the Dutch Health Care Consumer Panel<sup>18-20</sup>. This panel aims to measure opinions on and  
11 knowledge of health care as well as expectations and experiences with health care at a national level. The  
12 demographic characteristics of the panel members including their age, gender, level of education and self-reported  
13 general health were documented at the start of the panel membership and are updated annually. The protection of  
14 the data collected is registered with the Dutch Data Protection Authority (nr. 1262949).  
15  
16  
17  
18  
19  
20  
21  
22

### 23 **Questionnaire**

24 In June 2010, a questionnaire was sent to 1,422 panel members and returned by 972 members. According to their  
25 previously stated preference, 671 members received a questionnaire by post and 751 through the internet.  
26  
27  
28  
29  
30

### 31 The use of OTC drugs

32 The respondents were asked how long it has been since they had used OTC medications. Based on their answers,  
33 we generated a dichotomous variable for the use of OTC drugs in the year prior to the questionnaire (1=yes;  
34 0=no). In addition, the respondents who had used OTC drugs in the year prior to the questionnaire were asked  
35 what kind of OTC drugs they had used in that year. All questions had pre-defined categories of answers.  
36  
37  
38  
39  
40  
41

### 42 Confidence

43 Confidence was measured using three questions with regard to obtaining information on, choosing and using OTC  
44 medications. These were: 1) 'I am able to make a choice between different types and brands of OTC drugs'; 2) 'I  
45 know exactly how to use OTC drugs in a safe way'; and 3) 'When I try to get advice on OTC drugs, I can easily  
46 get the right information'. We used the same three items to examine consumers' confidence in the OTC skills of  
47 others, for example asking if: 'Others are able to make a choice between different types and brands of OTC  
48 drugs'. All items had a five-point Likert scale ranging from strongly disagrees to strongly agree. We evaluated for  
49 both scales whether the three items measured a single concept by calculating the internal consistency given by  
50 Cronbach's alpha. Only the respondents who filled out all three items were included (own: N=951; others:  
51  
52  
53  
54  
55  
56  
57  
58  
59  
60

1  
2  
3  
4  
5  
6  
7  
8  
9  
10  
11  
12  
13  
14  
15  
16  
17  
18  
19  
20  
21  
22  
23  
24  
25  
26  
27  
28  
29  
30  
31  
32  
33  
34  
35  
36  
37  
38  
39  
40  
41  
42  
43  
44  
45  
46  
47  
48  
49  
50  
51  
52  
53  
54  
55  
56  
57  
58  
59  
60

N=949). The internal consistency was good (for both scales Cronbach's alpha 0.81). Subsequently, a mean score was calculated for the respondents who filled out all three items ranging from 1 to 5, in which higher scores indicated greater confidence.

### Attitudes towards availability

We presented six safety profiles of analgesics in order to assess consumers' attitudes towards availability. Each profile described an analgesic having properties that resemble current available analgesics in the Netherlands (e.g. paracetamol and ibuprofen). The profiles were descriptions of possible adverse effects of their use, inappropriately or not, and were based on information reflected in patient information leaflets. They were constructed by one of the research members (MB), who is a pharmacist with special interest in OTC medication and author of a standard Dutch handbook of self-medication. We focused on OTC analgesics because analgesics are among the most commonly used medications<sup>14;16;21</sup>, and their inappropriate use can cause serious side effects<sup>5;6;13;21;22</sup>. The following six safety profiles were included: 1) 'No side effects when used as directed, but taking too many tablets can cause serious damage'; 2) 'Mild side effects, such as stomach and intestinal problems, but never serious side effects'; 3) 'In rare cases (less than 1 per 1,000) people suffer serious side effects, like gastrointestinal bleeding'; 4) 'Safe when used normally, but potentially serious side effects when used in combination with certain prescription drugs'; 5) 'Can be used safely by most people, but potentially serious side effects when used by elderly people and those with severe concomitant diseases'; and 6) 'Can be used safely by most people, but potentially serious side effects when used by children'. We asked respondents to indicate their preferences for where analgesics with the above described profiles should be available, with the following options: 1) general sales; 2) chemist; 3) pharmacy only; and 4) prescription only. It should be noted that in the questionnaire the options were used in a different order, namely: 1) pharmacy only; 2) chemist; 3) general sales; and 4) prescription only. The answer options were based on the Dutch Medicines Act. In addition, items scored as, 'I don't know', were recoded as missing (in total 115 times, 16 to 25 per profile). To evaluate whether the six items measured a single concept, we calculated the internal consistency given by Cronbach's alpha. Respondents who did not fill out all profiles were excluded from the analyses (excluded N=228, included N=744). The excluded respondents did not differ significantly from the respondents included with regard to their demographics. However, they were significantly more restrictive in their preferences for the safety profiles for which they did provide an answer. Factor analysis of the data identified one factor and the internal consistency was good (Cronbach's alpha 0.77).

1 Subsequently, a mean score was calculated for the items for the respondents who filled out all six profiles ranging  
2 from 1 to 4, whereby higher scores indicated a greater preference for restricting availability.  
3  
4

### 5 6 7 **Statistical analyses**

8  
9 Firstly, we performed descriptive statistics. Then, by means of t-tests and one-way analyses of variance (ANOVA)  
10 ( $p < 0.01$ ), we tested the association between the outcomes (consumers' confidence in their own OTC skills and  
11 consumers' attitudes) and demographic characteristics (gender, age in three categories, level of education and self-  
12 reported general health) and the use of OTC medications. Finally, we conducted a regression analysis to  
13 investigate the association between the dependent variable, consumers' attitudes, and the independent variables,  
14 consumers' confidence in their own OTC skills, demographic characteristics and use of OTC medications  
15 ( $p < 0.05$ ). We repeated this association using the total number of times respondents scored the options 'pharmacy  
16 only' and 'prescription only' (ranging from 0 to 6), instead of their mean scores, as a dependent variable. In the  
17 regression analyses, categorical variables were recoded into dummy variables. All statistical analyses were done  
18 using STATA, version 12.1.  
19  
20  
21  
22  
23  
24  
25  
26  
27  
28  
29  
30

### 31 **RESULTS**

32 In total, 972 panel members returned the questionnaire (response rate 68%). The response to the online  
33 questionnaire was lower than to the written questionnaire (62% respectively 76%). More than half (56%) of the  
34 respondents were female (Table 1). The age category 40 to 64 years included 54% of the respondents. Almost half  
35 (47%) had a middle level of education. General health was self-reported as excellent/very good in 31% of the  
36 cases. Compared to the Dutch population aged 18 years and older<sup>18</sup>, it was mainly young people (18 to 39 years)  
37 who were underrepresented in the group of respondents.  
38  
39  
40  
41  
42  
43  
44  
45

#### 46 **The use of OTC drugs**

47 Among the respondents, 83% used OTC medications in the year prior to the questionnaire (see Table 1). OTC  
48 analgesics were predominantly used. Almost all (97%) respondents that had used OTC-drugs in the year prior to  
49 the questionnaire, indicated that they had used analgesics, followed by medicines for coughs, colds, flu and a sore  
50 throat (76%).  
51  
52  
53  
54  
55  
56  
57

#### 58 **Confidence**



1 The mean score for consumers' confidence in their own OTC skills was 3.74 (95% CI: 3.69 to 3.79, on a 5-point  
2 Likert scale), indicating that respondents feel quite confident about their own OTC skills. Respondents felt clearly  
3 less confident about the OTC skills of others (mean score 2.92 and 95% CI: 2.88 to 2.96).  
4

5  
6  
7 As reflected in Figure 1, seven out of the ten respondents agreed, or strongly agreed, that they are able to make a  
8 choice between different types and brands of OTC drugs. Only 16% of them thought that others are able to make a  
9 choice. Furthermore, 65% of the respondents agreed, or strongly agreed, that they know exactly how to use OTC  
10 drugs in a safe way, while only 11% of them thought that others know how to apply OTC drugs safely. Lastly,  
11 76% of the respondents agreed, or strongly agreed, that they can easily get the right information when trying to  
12 get advice on OTC drugs, compared to 30% of them who believed that others are able to get the right information.  
13 ANOVAs and t-tests showed significant but modest differences between consumers' confidence in their own OTC  
14 skills and gender, age and level of education. Women feel slightly more confident about their own OTC skills than  
15 men. Furthermore, the elderly ( $\geq 65$  years) and people with a low level of education have slightly less confidence  
16 than younger people and people with a middle and high level of education. In addition, ANOVA showed that  
17 people who had used OTC medications in the year prior to the questionnaire were more confident about their own  
18 OTC skills than those who had not used OTC medications in the year prior to the questionnaire (mean 3.84  
19 respectively 3.24,  $p < 0.001$ ).  
20  
21  
22  
23  
24  
25  
26  
27  
28  
29  
30  
31  
32  
33  
34

### 35 **Attitudes towards availability**

36 Table 2 shows that the pharmacy is often mentioned as preferred channel where analgesics with the described  
37 profiles should be available (range 41% to 71%). For five out of the six profiles most respondents prefer that  
38 analgesics with such a profile should be available exclusively in pharmacies. Supermarkets or petrol stations were  
39 hardly mentioned as a preferred channel where analgesics with the described profiles should be available.  
40 ANOVAs and t-tests showed significant but modest differences between consumers' attitudes and age and level of  
41 education. Elderly ( $\geq 65$  years) are more restrictive in their preferences for availability than younger people.  
42 Moreover, people with a low level of education are more restrictive in their preferences than people with a middle  
43 and high level of education.  
44  
45  
46  
47  
48  
49  
50  
51

52 The last research question focused on the association between consumers' confidence in their own OTC skills and  
53 their attitudes towards availability (see Table 3). The regression analysis showed that respondents who were more  
54 confident about their own OTC skills preferred OTC analgesics to be more generally available. This association  
55 was observed in addition to the effects of age and the level of education already mentioned. The same results were  
56  
57  
58  
59  
60

1 shown when we performed an additional regression analysis, in which we used the total number of times  
2  
3 respondents scored the options 'pharmacy only' and 'prescription only' as a dependent variable.  
4  
5

## 7 **DISCUSSION**

### 9 **Principal findings**

10 Our findings show that consumers feel confident about their own OTC skills, but that they have less confidence in  
11 the OTC skills of others. In other words, consumers presume that, compared to themselves, other people are less  
12 able to use self-medication appropriately. Although consumers are confident, they are conservative in their  
13 attitudes towards the availability of OTC analgesics. Most consumers prefer that analgesics with the described  
14 profiles should be available in pharmacies exclusively. Currently, analgesics with profiles similar to those  
15 described are available for general sale in most European countries, including the Netherlands. Finally, we  
16 observed that more confident consumers preferred OTC analgesics to be more generally available.  
17  
18  
19  
20  
21  
22  
23  
24  
25  
26

### 27 **Comparisons with other studies**

28 Earlier research examined the public awareness, perception and knowledge of OTC medications. According to the  
29 literature, consumers perceive OTC drugs as safe<sup>14,15</sup> and "too weak to cause any real harm"<sup>6</sup>. Moreover, they are  
30 unaware of the fact that OTC medications can cause adverse events when used with other medications<sup>5,23</sup> and also  
31 of the toxicities of OTC medications<sup>4,14</sup>. Neither do they know, or are concerned, about the potential side effects  
32 of OTC-analgesics<sup>13,14</sup>. In addition, a recent study in Australia observed that fewer people are using NSAIDs  
33 appropriately according to the label, since ibuprofen has become available outside the pharmacy<sup>16</sup>. Summarized,  
34 consumers seem to be unaware of how to use OTC medications appropriately. Our study investigated consumers'  
35 confidence in OTC skills, using two measurements. There appears to be a discrepancy between the literature and  
36 the public perception about their own OTC skills, since consumers are convinced they know how to use OTC  
37 medications appropriately. The confidence consumers have in the skills of others seems more consistent with the  
38 literature. It also probably better connects to reality, since, in general, the estimates of consumers regarding their  
39 peers' attitudes and behaviours tend to be roughly accurate<sup>17</sup>. Moreover, it is in line with their attitudes towards  
40 availability of OTC analgesics. It appears that consumers have taken into account in their attitudes the confidence,  
41 or lack of it, that they have in the OTC skills of others. The assumption of the Dutch government that consumers  
42 prefer a less restrictive availability is not supported by our findings when confronted with safety information on  
43  
44  
45  
46  
47  
48  
49  
50  
51  
52  
53  
54  
55  
56  
57  
58  
59  
60

1 medication. Nevertheless, in many countries an increasing number of drugs that were previously only available on  
2 prescription have been switched to OTC status<sup>2,8;9</sup>.

### 8 **Implications**

9 As concluded by Hughes et al. (2001)<sup>24</sup>, confidence and preference for self-medication does not imply that the  
10 use of OTC medications is always optimal or appropriate. This is supported by the fact that the public's estimation  
11 of others will probably be more accurate. As a result, a proportion of OTC users, are probably overconfident in  
12 their own behaviour, and this may entail health risks. For example, Leendertse et al. (2008)<sup>25</sup> observed that  
13 NSAIDs are one of the medicines associated most often with potentially preventable medication-related hospital  
14 admissions. Moreover, Pirmohamed (2004)<sup>26</sup> observed that, among others, NSAIDs were most commonly  
15 implicated in admissions related to adverse drug reactions. Moreover, a Dutch study showed that during the last  
16 decade there had been an increase in requests on paracetamol poisoning to the National Poisons Information  
17 Center<sup>27</sup>. In our study, we were not able to link our results to the actual self-medication behaviour of the  
18 respondents, since we do not know what they do and buy. Therefore, further research is recommended to examine  
19 this.  
20  
21  
22  
23  
24  
25  
26  
27  
28  
29  
30  
31  
32

33 Previous research recommended to increase the risk awareness and knowledge among the public, and to educate  
34 them about OTC medications and their potential risks<sup>6;13;14;16;28</sup>. The question is whether people are either unable  
35 to understand and find the correct information, or whether they do not want, read, search or ask for this  
36 information. Therefore, it is not clear yet, how to inform the public and increase awareness among them. What  
37 seems clear is that consumers consider pharmacists to be a reliable source of information, since most of them  
38 prefer the analgesics described to be available in pharmacies exclusively. As a result, pharmacists could have an  
39 important role in questioning and informing patients about OTC medications.  
40  
41  
42  
43  
44  
45  
46  
47

### 48 **The strengths and limitations of the study**

49 An important strength of our study is the large sample size and the response rate of almost 70%. However, the  
50 respondents in our study are not fully representative of the adult Dutch population aged 18 plus. Therefore, we  
51 performed analyses to see whether there are differences between groups of consumers. We observed some  
52 significant differences. However, they do not appear to affect our conclusions since the differences were modest.  
53  
54  
55  
56  
57  
58 We included an indirect measurement of the concept 'attitudes towards availability' in our questionnaire instead  
59  
60

1 of asking directly where certain specific OTC analgesics should be available. Earlier research in the Netherlands  
2 demonstrated that when trade names of analgesics are presented to consumers, they judge them as safe. More than  
3 95%, respectively 70%, of the consumers considered paracetamol and ibuprofen as safe, or very safe<sup>29</sup>. It is a  
4 disadvantage that we did not include direct as well as indirect measurements in our questionnaire, as we are now  
5 not able to make a comparison between both measurements. Another possible limitation is that we excluded quite  
6 a considerable number of respondents (N=228), because they did not fill out all six safety profiles. The excluded  
7 respondents were more restrictive in their preferences, possibly implying a slight underestimation of the observed  
8 effects in our analyses.  
9  
10  
11  
12  
13  
14  
15  
16  
17  
18

### 19 **Conclusions**

20 This study aimed to examine consumers' confidence in OTC skills and their attitudes towards the availability of  
21 OTC analgesics. The Dutch government assumed that consumers are well-informed, know how to use OTC  
22 medications appropriately, and prefer a wider availability. It could be questioned whether these assumptions are  
23 true. Consumers feel confident about their own OTC skills; however, they would prefer analgesics with safety  
24 profiles resembling currently available OTC analgesics, to be available as OTC in pharmacies exclusively.  
25 Furthermore, the confidence consumers have in the OTC skills of others seems more consistent with their  
26 attitudes towards availability. Until consumers themselves realise they are also one of the others, they may  
27 overestimate their OTC skills, which may entail health risks.  
28  
29  
30  
31  
32  
33  
34  
35  
36  
37  
38  
39  
40  
41  
42  
43  
44  
45  
46  
47  
48  
49  
50  
51  
52  
53  
54  
55  
56  
57  
58  
59  
60

**Footnotes**

We thank the panel members of the Dutch Health Care Consumer Panel who participated in this study.

Preliminary results of part of this manuscript were presented at the 4<sup>th</sup> European Public Health Conference:

‘Public Health and Welfare – Welfare Development and Public Health’ from 9 to 12 November 2011,

Copenhagen. An abstract is available in the European Journal of Public Health, 21 (2011) suppl. 1, p 129.

Contributors: The study was devised and designed by LVD and MB. JDJ was responsible for the data collection in the Dutch Health Care Consumer Panel. AB performed the statistical analyses and drafted the manuscript. All other authors critically revised it. All authors gave their final approval for the manuscript version to be published. All authors are responsible for the overall content as guarantors.

Funding: Data collection of this study was funded by the Dutch Ministry of Health, Welfare and Sport. The funder had no role in the design, execution, and writing of the study.

Competing interests: All authors have completed the Unified Competing Interest form at

[www.ijemje.org/coi\\_disclosure.pdf](http://www.ijemje.org/coi_disclosure.pdf) (available on request from the corresponding author) and declare: the authors received support for the data collection from the Dutch Ministry of Health, Welfare and Sport for the work submitted. AB, MB and JDJ there was no financial relationship with any organisations that might have an interest in the submitted work in the previous three years. LVD received unrestricted grants from Bristol-Myers Squibb and Astra Zeneca for studies not related to this study in 2011 and 2012. And all authors that there was no other relationships or activities that could appear to have influenced the submitted work.

Ethical approval: According to the Dutch law, no ethical approval was needed. The protection of the collected data is registered with the Dutch Data Protection Authority (nr. 1262949).

Data sharing: Data is available on request and subject to approval by the programme committee of the Dutch Health Care Consumer Panel.

Exclusive licence: The Corresponding Author has the right to grant on behalf of all authors and does grant on behalf of all authors, an exclusive licence (or non exclusive for government employees) on a worldwide basis to the BMJ Publishing Group Ltd and its Licensees to permit this article (if accepted) to be published in BMJ editions and any other BMJ PGL products and sublicences to exploit all subsidiary rights, as set out in our licence.

## Reference List

- 1  
2  
3  
4 (1) Barber N. Drugs: from prescription only to pharmacy only. *BMJ* 1993; 307(6905):640.
- 5  
6 (2) Blenkinsopp A, Bradley C. Patients, society, and the increase in self medication. *BMJ* 1996;  
7  
8 312(7031):629-632.
- 9  
10 (3) Schoenemann JH, Muller-Oerlinghausen B, Munter KH, Enayati-Kashani S. Adverse drug  
11  
12 reactions (ADR) causing hospital admissions. *Pharmacoepidemiol Drug Saf* 1998; 7 Suppl 1:S1-  
13  
14 S3.
- 15  
16 (4) Huott MA, Storrow AB. A survey of adolescents' knowledge regarding toxicity of over-the-  
17  
18 counter medications. *Acad Emerg Med* 1997; 4(3):214-218.
- 19  
20 (5) Fendrick AM, Pan DE, Johnson GE. OTC analgesics and drug interactions: clinical implications.  
21  
22 *Osteopath Med Prim Care* 2008; 2:2.
- 23  
24 (6) Roumie CL, Griffin MR. Over-the-counter analgesics in older adults: a call for improved labelling  
25  
26 and consumer education. *Drugs Aging* 2004; 21(8):485-498.
- 27  
28 (7) Sheen CL, Dillon JF, Bateman DN, Simpson KJ, Macdonald TM. Paracetamol toxicity:  
29  
30 epidemiology, prevention and costs to the health-care system. *QJM* 2002; 95(9):609-619.
- 31  
32 (8) Hanna LA, Hughes CM. Public's views on making decisions about over-the-counter medication  
33  
34 and their attitudes towards evidence of effectiveness: a cross-sectional questionnaire study. *Patient*  
35  
36 *Educ Couns* 2011; 83(3):345-351.
- 37  
38 (9) Francis SA, Barnett N, Denham M. Switching of prescription drugs to over-the-counter status: is it  
39  
40 a good thing for the elderly? *Drugs Aging* 2005; 22(5):361-370.
- 41  
42 (10) US Government Accountability Office. Nonprescription drugs: Considerations regarding a behind-  
43  
44 the-counter drug class. Washington: 2009.
- 45  
46 (11) Van Dijk L, Van der Maat M, Salimans R, Bouvy M. De balans tussen verkrijgbaarheid en  
47  
48 veiligheid. Evaluatie van de indeling van zelfzorggeneesmiddelen en de rol van drogist en  
49  
50 apotheek bij de verstrekking. Utrecht: NIVEL; 2010.
- 51  
52 (12) Van Dijk L, Vervloet M, Plas M, Breuning E, Van den Ende E. Negatieve effecten van normaal en  
53  
54 verkeerd gebruik van geneesmiddelen. Een literatuurstudie. Utrecht: NIVEL; 2005.
- 55  
56 (13) Cham E, Hall L, Ernst AA, Weiss SJ. Awareness and use of over-the-counter pain medications: a  
57  
58 survey of emergency department patients. *South Med J* 2002; 95(5):529-535.
- 59  
60

- 1  
2  
3  
4  
5  
6  
7  
8  
9  
10  
11  
12  
13  
14  
15  
16  
17  
18  
19  
20  
21  
22  
23  
24  
25  
26  
27  
28  
29  
30  
31  
32  
33  
34  
35  
36  
37  
38  
39  
40  
41  
42  
43  
44  
45  
46  
47  
48  
49  
50  
51  
52  
53  
54  
55  
56  
57  
58  
59  
60
- (14) Wilcox CM, Cryer B, Triadafilopoulos G. Patterns of use and public perception of over-the-counter pain relievers: focus on nonsteroidal antiinflammatory drugs. *J Rheumatol* 2005; 32(11):2218-2224.
- (15) Clark D, Layton D, Shakir SA. Monitoring the safety of over the counter drugs. We need a better way than spontaneous reports. *BMJ* 2001; 323(7315):706-707.
- (16) Stosic R, Dunagan F, Palmer H, Fowler T, Adams I. Responsible self-medication: perceived risks and benefits of over-the-counter analgesic use. *Int J Pharm Pract* 2011; 19(4):236-245.
- (17) Balcetis E, Dunning D. Considering the situation: Why people are better social psychologists than self-psychologists. *Self and Identity* 2011.
- (18) Brabers AEM, Reitsma-van Rooijen M, De Jong JD. Consumentenpanel Gezondheidszorg. Basisrapport met informatie over het panel (2012). Utrecht: NIVEL; 2012.
- (19) Reitsma-van RM, de Jong JD, Rijken M. Regulated competition in health care: switching and barriers to switching in the Dutch health insurance system. *BMC Health Serv Res* 2011; 11:95.
- (20) de Jong JD, Brink-Muinen A, Groenewegen PP. The Dutch health insurance reform: switching between insurers, a comparison between the general population and the chronically ill and disabled. *BMC Health Serv Res* 2008; 8:58.
- (21) Singh G. Gastrointestinal complications of prescription and over-the-counter nonsteroidal anti-inflammatory drugs: a view from the ARAMIS database. Arthritis, Rheumatism, and Aging Medical Information System. *Am J Ther* 2000; 7(2):115-121.
- (22) Butt JH, Barthel JS, Moore RA. Clinical spectrum of the upper gastrointestinal effects of nonsteroidal anti-inflammatory drugs. Natural history, symptomatology, and significance. *Am J Med* 1988; 84(2A):5-14.
- (23) Indermitte J, Reber D, Beutler M, Bruppacher R, Hersberger KE. Prevalence and patient awareness of selected potential drug interactions with self-medication. *J Clin Pharm Ther* 2007; 32(2):149-159.
- (24) Hughes CM, McElnay JC, Fleming GF. Benefits and risks of self medication. *Drug Saf* 2001; 24(14):1027-1037.

- 1  
2  
3  
4  
5  
6  
7  
8  
9  
10  
11  
12  
13  
14  
15  
16  
17  
18  
19  
20  
21  
22  
23  
24  
25  
26  
27  
28  
29  
30  
31  
32  
33  
34  
35  
36  
37  
38  
39  
40  
41  
42  
43  
44  
45  
46  
47  
48  
49  
50  
51  
52  
53  
54  
55  
56  
57  
58  
59  
60
- (25) Leendertse AJ, Egberts AC, Stoker LJ, van den Bemt PM. Frequency of and risk factors for preventable medication-related hospital admissions in the Netherlands. *Arch Intern Med* 2008; 168(17):1890-1896.
- (26) Pirmohamed M, James S, Meakin S, Green C, Scott AK, Walley TJ et al. Adverse drug reactions as cause of admission to hospital: prospective analysis of 18 820 patients. *BMJ* 2004; 329(7456):15-19.
- (27) Van Dijk L, Van der Maat M, Bouvy M. Zelfzorggeneesmiddelen: actieve voorlichting over zelfzorg nodig. Aantal paracetamolvergiftigingen gestegen. *Pharmaceutisch Weekblad* 2010; 146(51-52):18-20.
- (28) Calamusa A, Di MA, Cristofani R, Arrighetti P, Santaniello V, Alfani S et al. Factors that influence Italian consumers' understanding of over-the-counter medicines and risk perception. *Patient Educ Couns* 2012; 87(3):395-401.
- (29) TNS/Nipo. Advisering bij zelfzorggeneesmiddelen in drogisterijen. Amsterdam: 2010.



1  
2  
3  
4  
5 **Tables and figures**  
6

7 *Table 1: Demographic characteristics of the respondents*  
8

|                                                                | N          | %    |
|----------------------------------------------------------------|------------|------|
| <b>Gender</b>                                                  | <b>972</b> |      |
| Male                                                           | 424        | 43.6 |
| Female                                                         | 548        | 56.4 |
| <b>Age</b>                                                     | <b>972</b> |      |
| 18-39 years                                                    | 88         | 9.1  |
| 40-64 years                                                    | 527        | 54.2 |
| 65 years and older                                             | 357        | 36.7 |
| <b>Education</b>                                               | <b>948</b> |      |
| Low (none, primary school or pre-vocational education)         | 184        | 19.4 |
| Middle (secondary or vocational education)                     | 448        | 47.3 |
| High (professional higher education or university)             | 316        | 33.3 |
| <b>Self-reported general health</b>                            | <b>965</b> |      |
| Poor/bad                                                       | 175        | 18.1 |
| Good                                                           | 487        | 50.5 |
| Excellent/very good                                            | 303        | 31.4 |
| <b>Use of OTC drugs in the year prior to the questionnaire</b> | <b>960</b> |      |
| No                                                             | 160        | 16.7 |
| Yes                                                            | 800        | 83.3 |

Table 2: Percentage of respondents that prefer a specific channel with regards to the availability of OTC analgesics

| Safety profiles*                                                                                                                               | N   | Percentage of respondents that prefer a channel |         |                  |                      | Mean score **<br>(95% CI)     |
|------------------------------------------------------------------------------------------------------------------------------------------------|-----|-------------------------------------------------|---------|------------------|----------------------|-------------------------------|
|                                                                                                                                                |     | Supermarket/<br>petrol station                  | Chemist | Pharmacy<br>only | Prescription<br>only |                               |
| Safe when used normally, but potentially serious side effects when used in combination with certain prescription drugs                         | 876 | 1.1                                             | 7.4     | 70.8             | 20.7                 | <b>3.11</b><br>(3.07 to 3.15) |
| Can be used safely by most people, but potentially serious side effects when used by elderly people and those with severe concomitant diseases | 875 | 1.0                                             | 12.6    | 65.3             | 21.1                 | <b>3.07</b><br>(3.02 to 3.11) |
| Can be used safely by most people, but potentially serious side effects when used by children                                                  | 859 | 2.2                                             | 18.6    | 59.6             | 19.6                 | <b>2.97</b><br>(2.92 to 3.01) |
| In rare cases (less than 1 per 1,000) people suffer serious side effects, like gastrointestinal bleedings                                      | 848 | 3.5                                             | 25.4    | 52.7             | 18.4                 | <b>2.86</b><br>(2.81 to 2.91) |
| No side effects when used as directed, but taking too many tablets can cause serious damage                                                    | 813 | 8.1                                             | 34.0    | 46.0             | 11.9                 | <b>2.62</b><br>(2.56 to 2.67) |
| Mild side effects, such as stomach and intestinal problems, but never serious side effects                                                     | 841 | 4.8                                             | 45.3    | 40.7             | 9.3                  | <b>2.54</b><br>(2.50 to 2.59) |

\* Safety profiles are ordered based on their mean score. In the questionnaire, they were ordered in another way.

\*\* Ranging from 1 to 4 (1 = wide availability; 4 = restrictive availability).

Table 3: Regression model for attitudes towards availability (N=703)

|                                                                          | Beta*           | P-value      |
|--------------------------------------------------------------------------|-----------------|--------------|
| <b>Availability (1= wide; 4 = restrictive)</b>                           |                 |              |
| <b>Confidence (1 = low; 5 = high)</b>                                    | -0.115          | <b>0.003</b> |
| <b>Gender (0 = man; 1 = woman)</b>                                       | 0.016           | 0.688        |
| <b>Age</b>                                                               | 0.117           | <b>0.003</b> |
| <b>Level of education</b>                                                |                 |              |
| -Low                                                                     | reference level |              |
| -Middle                                                                  | -0.131          | <b>0.010</b> |
| -High                                                                    | -0.254          | <b>0.000</b> |
| <b>Self-reported general health</b>                                      |                 |              |
| -Bad/poor                                                                | reference level |              |
| -Good                                                                    | 0.021           | 0.688        |
| -Excellent/very good                                                     | -0.020          | 0.705        |
| <b>Use of OTC drugs in year prior to questionnaire (0 = no; 1 = yes)</b> | -0.013          | 0.743        |
| <b>Constant</b>                                                          | .               | <b>0.000</b> |

Adjusted R-square: 0.07

\* Standardized coefficients

Figure 1: Consumers' confidence in their own OTC skills and in the OTC skills of others

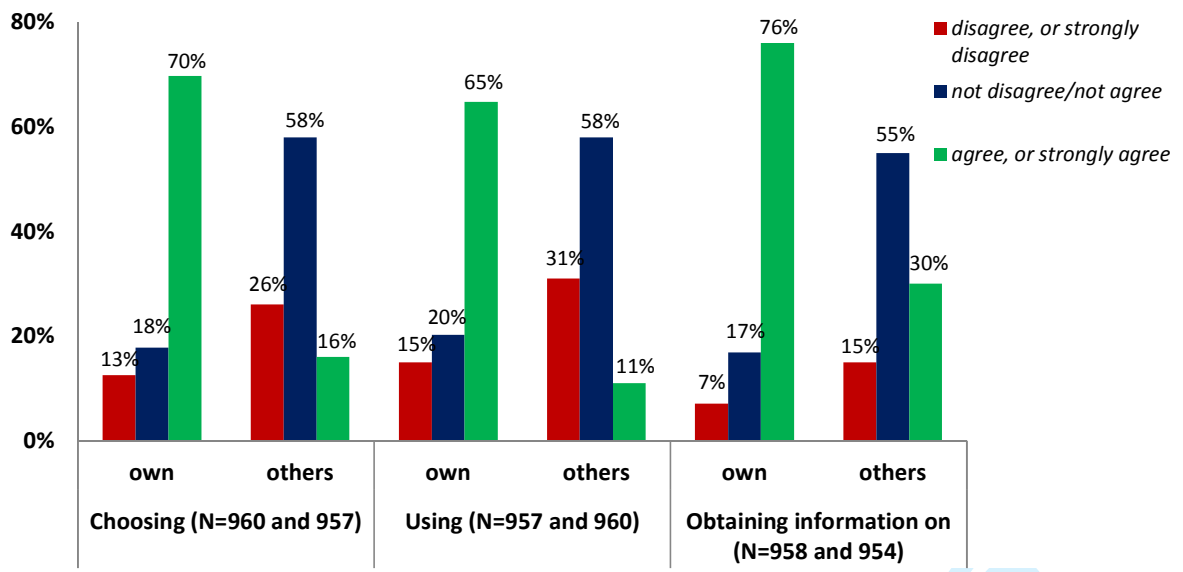

**Choosing:** I am / others are able to make a choice between different types and brands of OTC drugs

**Using:** I / others know exactly how to use OTC drugs in a safe way

**Obtaining information on:** When I / others try to get advice on OTC drugs, I / others can easily get the right information

Review Only

STROBE 2007 (v4) Statement—Checklist of items that should be included in reports of *cross-sectional studies*

| Section/Topic                | Item # | Recommendation                                                                                                                                                                       | Reported on page #                              |
|------------------------------|--------|--------------------------------------------------------------------------------------------------------------------------------------------------------------------------------------|-------------------------------------------------|
| Title and abstract           | 1      | (a) Indicate the study's design with a commonly used term in the title or the abstract                                                                                               | page 1                                          |
|                              |        | (b) Provide in the abstract an informative and balanced summary of what was done and what was found                                                                                  | page 2 & 3 (Article Summary)                    |
| <b>Introduction</b>          |        |                                                                                                                                                                                      |                                                 |
| Background/rationale         | 2      | Explain the scientific background and rationale for the investigation being reported                                                                                                 | page 4                                          |
| Objectives                   | 3      | State specific objectives, including any prespecified hypotheses                                                                                                                     | page 4 & 5                                      |
| <b>Methods</b>               |        |                                                                                                                                                                                      |                                                 |
| Study design                 | 4      | Present key elements of study design early in the paper                                                                                                                              | page 5                                          |
| Setting                      | 5      | Describe the setting, locations, and relevant dates, including periods of recruitment, exposure, follow-up, and data collection                                                      | page 5<br>(Data collection in June & July 2010) |
| Participants                 | 6      | (a) Give the eligibility criteria, and the sources and methods of selection of participants                                                                                          | NA                                              |
| Variables                    | 7      | Clearly define all outcomes, exposures, predictors, potential confounders, and effect modifiers. Give diagnostic criteria, if applicable                                             | page 5, 6 & 7                                   |
| Data sources/<br>measurement | 8*     | For each variable of interest, give sources of data and details of methods of assessment (measurement). Describe comparability of assessment methods if there is more than one group | page 5, 6 & 7                                   |
| Bias                         | 9      | Describe any efforts to address potential sources of bias                                                                                                                            | NA                                              |
| Study size                   | 10     | Explain how the study size was arrived at                                                                                                                                            | page 5                                          |
| Quantitative variables       | 11     | Explain how quantitative variables were handled in the analyses. If applicable, describe which groupings were chosen and why                                                         | page 7                                          |
| Statistical methods          | 12     | (a) Describe all statistical methods, including those used to control for confounding                                                                                                | page 7                                          |
|                              |        | (b) Describe any methods used to examine subgroups and interactions                                                                                                                  | page 7                                          |
|                              |        | (c) Explain how missing data were addressed                                                                                                                                          | page 5, 6 & 7                                   |
|                              |        | (d) If applicable, describe analytical methods taking account of sampling strategy                                                                                                   | NA                                              |

|                          |     |                                                                                                                                                                                                              |                                                                             |
|--------------------------|-----|--------------------------------------------------------------------------------------------------------------------------------------------------------------------------------------------------------------|-----------------------------------------------------------------------------|
|                          |     | (e) Describe any sensitivity analyses                                                                                                                                                                        | page 7                                                                      |
| <b>Results</b>           |     |                                                                                                                                                                                                              |                                                                             |
| Participants             | 13* | (a) Report numbers of individuals at each stage of study—eg numbers potentially eligible, examined for eligibility, confirmed eligible, included in the study, completing follow-up, and analysed            | page 5                                                                      |
|                          |     | (b) Give reasons for non-participation at each stage                                                                                                                                                         | NA                                                                          |
|                          |     | (c) Consider use of a flow diagram                                                                                                                                                                           | NA                                                                          |
| Descriptive data         | 14* | (a) Give characteristics of study participants (eg demographic, clinical, social) and information on exposures and potential confounders                                                                     | See table 1 (page 16) & page 7                                              |
|                          |     | (b) Indicate number of participants with missing data for each variable of interest                                                                                                                          | See table 1 (page 16), table 2 (page 17), figure 1 (page 19) and page 5 & 6 |
| Outcome data             | 15* | Report numbers of outcome events or summary measures                                                                                                                                                         | page 7, 8 & 9                                                               |
| Main results             | 16  | (a) Give unadjusted estimates and, if applicable, confounder-adjusted estimates and their precision (eg, 95% confidence interval). Make clear which confounders were adjusted for and why they were included | NA                                                                          |
|                          |     | (b) Report category boundaries when continuous variables were categorized                                                                                                                                    | See table 1 (page 16)                                                       |
|                          |     | (c) If relevant, consider translating estimates of relative risk into absolute risk for a meaningful time period                                                                                             | NA                                                                          |
| Other analyses           | 17  | Report other analyses done—eg analyses of subgroups and interactions, and sensitivity analyses                                                                                                               | page 7, 8 & 9                                                               |
| <b>Discussion</b>        |     |                                                                                                                                                                                                              |                                                                             |
| Key results              | 18  | Summarise key results with reference to study objectives                                                                                                                                                     | page 9                                                                      |
| Limitations              | 19  | Discuss limitations of the study, taking into account sources of potential bias or imprecision. Discuss both direction and magnitude of any potential bias                                                   | page 10 & 11                                                                |
| Interpretation           | 20  | Give a cautious overall interpretation of results considering objectives, limitations, multiplicity of analyses, results from similar studies, and other relevant evidence                                   | page 9, 10 & 11                                                             |
| Generalisability         | 21  | Discuss the generalisability (external validity) of the study results                                                                                                                                        | page 10                                                                     |
| <b>Other information</b> |     |                                                                                                                                                                                                              |                                                                             |
| Funding                  | 22  | Give the source of funding and the role of the funders for the present study and, if applicable, for the original study on which the present article is based                                                | page 12                                                                     |

\*Give information separately for cases and controls in case-control studies and, if applicable, for exposed and unexposed groups in cohort and cross-sectional studies.

1  
2  
3  
4 **Note:** An Explanation and Elaboration article discusses each checklist item and gives methodological background and published examples of transparent reporting. The STROBE  
5 checklist is best used in conjunction with this article (freely available on the Web sites of PLoS Medicine at <http://www.plosmedicine.org/>, Annals of Internal Medicine at  
6 <http://www.annals.org/>, and Epidemiology at <http://www.epidem.com/>). Information on the STROBE Initiative is available at [www.strobe-statement.org](http://www.strobe-statement.org).  
7  
8  
9  
10  
11  
12  
13  
14  
15  
16  
17  
18  
19  
20  
21  
22  
23  
24  
25  
26  
27  
28  
29  
30  
31  
32  
33  
34  
35  
36  
37  
38  
39  
40  
41  
42  
43  
44  
45  
46  
47  
48  
49

For peer review only



**WHERE TO BUY OTC MEDICATIONS?  
A cross-sectional survey investigating consumers' confidence in over-the-counter (OTC) skills and their attitudes towards the availability of OTC painkillers.**

|                                 |                                                                                                                                                                                                                                                                                                                                                                                                                              |
|---------------------------------|------------------------------------------------------------------------------------------------------------------------------------------------------------------------------------------------------------------------------------------------------------------------------------------------------------------------------------------------------------------------------------------------------------------------------|
| Journal:                        | <i>BMJ Open</i>                                                                                                                                                                                                                                                                                                                                                                                                              |
| Manuscript ID:                  | bmjopen-2013-003455.R1                                                                                                                                                                                                                                                                                                                                                                                                       |
| Article Type:                   | Research                                                                                                                                                                                                                                                                                                                                                                                                                     |
| Date Submitted by the Author:   | 19-Aug-2013                                                                                                                                                                                                                                                                                                                                                                                                                  |
| Complete List of Authors:       | Brabers, Anne; NIVEL Netherlands institute for health services research, van Dijk, Liset; NIVEL Netherlands institute for health services research, Bouvy, Marcel; Utrecht Institute for Pharmaceutical Sciences, Utrecht University, Division of Pharmacoepidemiology and Clinical Pharmacology; SIR Institute for Pharmacy Practice and Policy, De Jong, Judith; NIVEL Netherlands institute for health services research, |
| <b>Primary Subject Heading</b>: | Health services research                                                                                                                                                                                                                                                                                                                                                                                                     |
| Secondary Subject Heading:      | Health policy                                                                                                                                                                                                                                                                                                                                                                                                                |
| Keywords:                       | Health & safety < HEALTH SERVICES ADMINISTRATION & MANAGEMENT, Health policy < HEALTH SERVICES ADMINISTRATION & MANAGEMENT, Organisation of health services < HEALTH SERVICES ADMINISTRATION & MANAGEMENT                                                                                                                                                                                                                    |
|                                 |                                                                                                                                                                                                                                                                                                                                                                                                                              |

SCHOLARONE™  
Manuscripts

only



## WHERE TO BUY OTC MEDICATIONS?

**A cross-sectional survey investigating consumers' confidence in over-the-counter (OTC) skills and their attitudes towards the availability of OTC painkillers.**

Brabers AEM<sup>1§</sup>, Van Dijk L<sup>1</sup>, Bouvy ML<sup>23</sup>, De Jong JD<sup>1</sup>

<sup>1</sup> NIVEL, Netherlands Institute for Health Services Research, PO Box 1568, 3500 BN Utrecht, the Netherlands

<sup>2</sup> Division Pharmacoepidemiology & Clinical Pharmacology, Utrecht Institute for Pharmaceutical Sciences (UIPS), PO Box 80082, 3500 TB Utrecht, the Netherlands

<sup>3</sup> SIR Institute for Pharmacy Practice and Policy, Theda Mansholtstraat 5b, 2331 JE Leiden, the Netherlands

§ Corresponding author

Contact address corresponding author:

PO Box 1568, 3500 BN Utrecht, the Netherlands

Email addresses:

AB: [a.brabers@nivel.nl](mailto:a.brabers@nivel.nl)

LVD: [l.vandijk@nivel.nl](mailto:l.vandijk@nivel.nl)

MB: [m.l.bouvy@uu.nl](mailto:m.l.bouvy@uu.nl)

JDJ: [j.dejong@nivel.nl](mailto:j.dejong@nivel.nl)

Main work positions:

AB: Junior researcher NIVEL

LVD: Programme co-ordinator NIVEL

MB: Professor of Pharmaceutical Care, Division of Pharmacoepidemiology & Clinical Pharmacology, Utrecht Institute for Pharmaceutical Sciences (UIPS)

JDJ: Programme co-ordinator NIVEL

**ABSTRACT**

**Objective:** To examine consumers' confidence in their own, and also in other people's, over-the-counter (OTC) skills and to describe their attitudes towards the availability of OTC painkillers. Moreover we examined the association between confidence in OTC skills and attitudes.

**Design:** Cross-sectional survey. Mixed methods (postal and electronic) self-administered questionnaire.

**Participants:** Members of the Dutch Health Care Consumer Panel.

**Main outcome measures:** Consumers' confidence in their own, and in other people's, OTC skills was examined. Confidence was measured by three questions regarding obtaining information on, choosing, and using OTC medication. Consumers' attitudes towards availability were assessed using six safety profiles, by asking which channel consumers prefer for each profile

**Results:** The response rate was 68% (N=972). Consumers feel confident about their own OTC skills (mean 3.74; 95% CI 3.69 to 3.79, on a 5-point Likert scale), but have less confidence in OTC skills of others (mean 2.92; 95% CI 2.88 to 2.96). Consumers are conservative in their attitudes towards the availability of OTC painkillers. Most consumers prefer painkillers to be available exclusively in pharmacies (41 to 71% per profile indicated pharmacy only). Moreover, there is an association between confidence in OTC skills and attitudes ( $p=0.005$ ;  $\beta=-0.114$ ). Consumers who are more confident about their own OTC skills prefer OTC painkillers to be more generally available.

**Conclusions:** Consumers feel confident about their own OTC skills. However, they would prefer painkillers with safety profiles resembling those currently available OTC, to be available as OTC in pharmacies exclusively. Consumers' confidence in the OTC skills of others is more consistent with their attitudes towards availability of OTC painkillers. Until consumers themselves realise they are also one of the others, they may overestimate their own OTC skills, which may entail health risks.

## Article summary

### Article focus

- Several studies have observed that consumers appear to be unaware of how to use OTC medications appropriately, which may entail health risks.
- Until now little is known about consumers' confidence in their own and other people's OTC skills and their attitudes towards the availability of OTC painkillers.
- This study aimed to examine consumers' confidence in both their own, and in other people's, OTC skills, to look too at their attitudes towards the availability of OTC painkillers, and to examine the association between confidence in OTC skills and attitudes.

### Key messages

- Consumers feel confident about their own OTC skills. However, they prefer that painkillers with safety profiles resembling those currently available OTC, to be available as OTC in pharmacies exclusively.
- Consumers have less confidence in the OTC skills of others. This perception is more consistent with their attitudes towards availability of OTC painkillers.
- Until consumers themselves realise they are also one of the others, they may overestimate their own OTC skills, which may entail health risks.

### Strengths and limitations of this study

- Strengths include the large sample size and the response rate of almost 70% and the inclusion of an indirect measurement of the concept 'attitudes towards availability' in our questionnaire instead of asking directly where certain specific OTC painkillers should be available. Another strength is that this study addresses a relatively unexplored area.
- Limitations include not being able to make a comparison between a direct as well as indirect measurements and not being able to link our results to the actual self-medication behaviour of the respondents. In addition, the study only relates to painkillers, the most used OTCs in the Netherlands.

## BACKGROUND

The need to save on health care spending and the trend to enhance self care have led to more emphasis on patients taking their own responsibility for the management of minor ailments, including the use of medication that is available without a prescription<sup>1,2</sup>. Today, a wide range of conditions can be treated using medications that are available OTC. Some examples of categories of medicines that have been reclassified to non-prescription medication in many countries are NSAIDs, anti fungal creams and laxatives. However, inappropriate use of OTC medications entails considerable health risks. Several studies demonstrated that inappropriate use results in drug intoxication, drug interactions, side effects and increased health care costs as a consequence of extra visits to a doctor and hospitalization<sup>3-7</sup>. Nevertheless, in many countries, increasingly more drugs that were previously only available on prescription are being switched to OTC status<sup>2,8,9</sup>. A study of the US Government Accountability Office conducted in the UK, the USA, the Netherlands, Italy and Australia, showed that since 1995 all these countries have increased OTC availability. This is due either to changes in the classification of non-prescription drugs or to the reclassification of medications into less restrictive classes<sup>10</sup>.

In the Netherlands, the availability of OTC drugs increased when the Dutch government changed the system for OTC medications. The Dutch healthcare policy is based on ideas that independent and critical consumers require an increased availability of OTC medication in order to select a particular drug themselves. Since the introduction of the Medicines Act on 1 July 2007, three categories of non-prescription drugs have been specified: 1) pharmacy only; 2) pharmacy or chemist only; and 3) general sales<sup>11</sup>. Before July 2007, the third category did not exist. In the Netherlands, there is a distinction between pharmacies and chemists. Pharmacies are run by a pharmacist and able to sell all prescription and non-prescription drugs, while chemists are run by a druggist, who requires less training than a pharmacist and is able to sell many but not all non-prescription drugs<sup>10</sup>. When introducing the new legislation, the Dutch government argued that consumers are well-informed and know how to use OTC drugs appropriately<sup>11,12</sup>. This assumption was not supported by international literature. Earlier research, mainly focused on analgesics, observed that consumers appear to be unaware of how to use OTC medications appropriately<sup>4-6,13-16</sup>.

There has been little research conducted into how consumers themselves perceive their skills in using OTC medications appropriately. It is important to gain some insight into areas such as overestimating OTC skills as this may result in risks to health. The purpose of the present study was to examine consumers' confidence in OTC

1 skills. We examined consumers' confidence, both in their own OTC skills, and in those of others. This is because  
2 previous research has shown that "people tend to think positively of themselves, often to unrealistic degrees"<sup>17</sup>.  
3  
4 Moreover, the literature demonstrated that consumers' estimates of their peers' attitudes and behaviours tend to be  
5 roughly accurate<sup>17</sup>. Furthermore, we examined which channels consumers prefer with regard to the availability of  
6 OTC painkillers. Finally, we examined the association between consumers' confidence in OTC skills and their  
7 attitudes towards the availability of OTC painkillers, as we expected that more confident consumers prefer them  
8 to be more generally available.  
9  
10  
11  
12  
13  
14

## 15 16 17 **METHODS**

### 18 **Setting**

19 Data were collected in the Dutch Health Care Consumer Panel<sup>18-20</sup>. This panel aims to measure opinions on and  
20 knowledge of health care as well as expectations and experiences with health care at a national level. At the time  
21 of the study (June 2010), the Consumer Panel consisted of approximately 3,000 people aged 18 years and older.  
22 Each individual member of the panel receives a questionnaire approximately three times a year and can quite the  
23 panel any time. There is no possibility for consumers to sign up for the panel on their own initiative. The panel is  
24 renewed on regular base. Renewal is necessary to make sure that members do not develop specific knowledge of,  
25 and attention for, health care issues, and that no questionnaire-fatigue occurs. Moreover, renewal compensates for  
26 panel members who, for example, have died or moved without informing us about the new address. To recruit  
27 new panel members an address file is bought from an address supplier. As a result, possible new members are  
28 sampled at random from the general population in the Netherlands. Sampled people receive an information letter  
29 about the panel and are called within a week after receiving that letter. If they are interested, they receive a  
30 questionnaire on their demographic characteristics. When that questionnaire is returned, they are considered  
31 members of the panel. The demographic characteristics of the panel members including their age, gender, level of  
32 education, self-reported general health and whether they work(ed) or never worked in healthcare are documented  
33 at the start of the panel membership and are updated annually. Data are anonymously processed, and the  
34 protection of the data collected is registered with the Dutch Data Protection Authority (nr. 1262949).  
35  
36  
37  
38  
39  
40  
41  
42  
43  
44  
45  
46  
47  
48  
49  
50  
51  
52  
53

### 54 **Questionnaire**

55 In June 2010, a self-administered questionnaire was sent to 1,422 panel members and returned by 972 members.  
56 According to their previously stated preference, 671 members received a questionnaire by post and 751 through  
57  
58  
59  
60

1 the internet. In total, the questionnaire included 36 questions focusing on different aspects of OTC medications.  
2  
3 To increase the response from the onset, two electronic reminders and one postal reminder were sent to panel  
4  
5 members who had not responded yet.  
6  
7  
8  
9

### 10 11 The use of OTC drugs

12 The respondents were asked how long it has been since they had used OTC medications. OTC medications were  
13 defined in the questionnaire as follows: “OTC medications are medicines that you can buy at pharmacies and  
14 chemists without a doctors’ prescription. In addition, you can buy some of these medicines at supermarkets and  
15 petrol stations. Examples of OTC medications are painkillers, such as paracetamol or ibuprofen. Homeopathic  
16 medicines, nutritional supplements and contraceptives are not considered to be OTC medications”. Based on their  
17 answers, we generated a dichotomous variable for the use of OTC drugs in the year prior to the questionnaire  
18 (1=yes; 0=no). In addition, the respondents who had used OTC drugs in the year prior to the questionnaire were  
19 asked what kind of categories (pre-defined) of OTC drugs they had used in that year. All questions had pre-  
20 defined categories of answers.  
21  
22  
23  
24  
25  
26  
27  
28  
29  
30  
31  
32

### 33 Confidence

34 Confidence was measured using three questions with regard to obtaining information on, choosing and using OTC  
35 medications. These were: 1) ‘I am able to make an appropriate choice between different types and brands of OTC  
36 drugs’; 2) ‘I know exactly how to use OTC drugs in a safe way’; and 3) ‘When I try to get advice on OTC drugs, I  
37 can easily get the right information’. We used the same three items to examine consumers’ confidence in the OTC  
38 skills of others, for example asking if: ‘Others are able to make an appropriate choice between different types and  
39 brands of OTC drugs’. All items had a five-point Likert scale ranging from strongly disagrees to strongly agree.  
40 We evaluated for both scales whether the three items measured a single concept by calculating the internal  
41 consistency given by Cronbach’s alpha. Only the respondents who filled out all three items were included (own:  
42 N=951; others: N=949). The internal consistency was good (for both scales Cronbach’s alpha 0.81).  
43  
44 Subsequently, a mean score was calculated for the respondents who filled out all three items ranging from 1 to 5,  
45 in which higher scores indicated greater confidence.  
46  
47  
48  
49  
50  
51  
52  
53  
54  
55  
56  
57

### 58 Attitudes towards availability

1 We presented six safety profiles of painkillers in order to assess consumers' attitudes towards availability. Each  
2 profile described a painkiller having properties that resemble current available painkillers in the Netherlands (e.g.  
3 paracetamol and ibuprofen). The profiles were descriptions of possible adverse effects of their use, inappropriately  
4 or not, and were based on information reflected in patient information leaflets and summaries of product  
5 characteristics. They were constructed by one of the research members (MB), who is a pharmacist with special  
6 interest in OTC medication and author of a standard Dutch handbook of self-medication. We focused on OTC  
7 painkillers because painkillers are among the most commonly used medications<sup>14;16;21</sup>, and their inappropriate use  
8 can cause serious side effects<sup>5;6;13;21;22</sup>. The following six safety profiles were included: 1) 'No side effects when  
9 used as directed, but taking too many tablets can cause serious damage'; 2) 'Mild side effects, such as stomach  
10 and intestinal problems, but never serious side effects'; 3) 'In rare cases (less than 1 per 1,000) people suffer  
11 serious side effects, like gastrointestinal bleeding'; 4) 'Safe when used normally, but potentially serious side  
12 effects when used in combination with certain prescription drugs'; 5) 'Can be used safely by most people, but  
13 potentially serious side effects when used by elderly people and those with severe concomitant diseases'; and 6)  
14 'Can be used safely by most people, but potentially serious side effects when used by children'. We asked  
15 respondents to indicate their preferences for the availability of painkillers with the above described profiles, with  
16 the following options: general sales (defined in the questionnaire as supermarket / petrol station); chemist;  
17 pharmacy only; and prescription only. It should be noted that in the questionnaire the options were used in a  
18 different order, namely: pharmacy only; chemist; general sales; and prescription only. The answer options were  
19 based on the Dutch Medicines Act. The options were scored as 1 general sales; 2 chemist; 3 pharmacy only; and 4  
20 prescription only. In addition, items scored as, 'I don't know', were recoded as missing (in total 115 times, 16 to  
21 25 per profile). To evaluate whether the six items measured a single concept, we calculated the internal  
22 consistency given by Cronbach's alpha. Respondents who did not fill out all profiles were excluded from the  
23 analyses (excluded N=228, included N=744). The excluded respondents did not differ significantly from the  
24 respondents included with regard to their demographics. However, they were significantly more restrictive in their  
25 preferences for the safety profiles for which they did provide an answer. Factor analysis of the data identified one  
26 factor and the internal consistency was good (Cronbach's alpha 0.77). Subsequently, a mean score was calculated  
27 for the items for the respondents who filled out all six profiles ranging from 1 to 4, whereby higher scores  
28 indicated a greater preference for restricting availability.

## 58 Statistical analyses

1 Firstly, we performed descriptive statistics. Then, by means of t-tests and one-way analyses of variance (ANOVA)  
2  
3 (p<0.01), we tested the association between the outcomes (consumers' confidence in their own OTC skills and  
4  
5 consumers' attitudes) and demographic characteristics (gender, age in three categories, level of education, self-  
6  
7 reported general health and whether they work(ed) or never worked in healthcare) and the use of OTC  
8  
9 medications. Finally, we conducted a regression analysis to investigate the association between the dependent  
10  
11 variable, consumers' attitudes, and the independent variables, consumers' confidence in their own OTC skills,  
12  
13 demographic characteristics and use of OTC medications (p<0.05). We repeated this association using the total  
14  
15 number of times respondents scored the options 'pharmacy only' and 'prescription only' (ranging from 0 to 6),  
16  
17 instead of their mean scores, as a dependent variable. In the regression analyses, categorical variables were  
18  
19 recoded into dummy variables. All statistical analyses were done using STATA, version 12.1.  
20  
21

## 22 **RESULTS**

23  
24 In total, 972 panel members returned the questionnaire (response rate 68%). The response to the online  
25  
26 questionnaire was lower than to the written questionnaire (62% respectively 76%). More than half (56%) of the  
27  
28 respondents were female (Table 1). The age category 40 to 64 years included 54% of the respondents. Almost half  
29  
30 (47%) had a middle level of education. General health was self-reported as excellent/very good in 31% of the  
31  
32 cases. 72% of the respondents had never worked in healthcare. Compared to the Dutch population aged 18 years  
33  
34 and older<sup>18</sup>, it was mainly young people (18 to 39 years) who were underrepresented in the group of respondents  
35  
36 (see Table 1).  
37  
38

### 39 **The use of OTC drugs**

40  
41 Among the respondents, 83% used OTC medications in the year prior to the questionnaire (see Table 1). Almost  
42  
43 all respondents that had used OTC-drugs in the year prior to the questionnaire, indicated that they had used pain  
44  
45 and antipyretic medicines (97%). Furthermore, 76% of the respondents that had used OTC-drugs in the year prior  
46  
47 to the questionnaire indicated that they had used medicines for coughs, colds, flu and a sore throat.  
48  
49  
50

### 51 **Confidence**

52  
53 The mean score for consumers' confidence in their own OTC skills was 3.74 (95% CI: 3.69 to 3.79, on a 5-point  
54  
55 Likert scale), indicating that respondents felt quite confident about their own OTC skills. Clearly, the respondents  
56  
57 felt less confident about the OTC skills of others (mean score 2.92 and 95% CI: 2.88 to 2.96).  
58  
59  
60



1 As reflected in Figure 1, seven out of the ten respondents agreed, or strongly agreed, that they are able to make an  
2 appropriate choice between different types and brands of OTC drugs. Only 16% of them thought that others are  
3 able to make an appropriate choice. Furthermore, 65% of the respondents agreed, or strongly agreed, that they  
4 know exactly how to use OTC drugs in a safe way, while only 11% of them thought that others know how to use  
5 OTC drugs safely. Lastly, 76% of the respondents agreed, or strongly agreed, that they can easily get the right  
6 information when trying to get advice on OTC drugs, compared to 30% of them who believed that others are able  
7 to get the right information.  
8

9 ANOVAs and t-tests showed significant but modest differences between consumers' confidence in their own OTC  
10 skills and gender, age, level of education and whether they work(ed) or never worked in healthcare. Women felt  
11 slightly more confident about their own OTC skills than men. Furthermore, the elderly ( $\geq 65$  years) and people  
12 with a low level of education had slightly less confidence than younger people and people with a middle and high  
13 level of education. People that currently work in healthcare or have worked in healthcare in the past felt slightly  
14 more confident about their own OTC skills than people that never worked in healthcare. In addition, ANOVA  
15 showed that people who had used OTC medications in the year prior to the questionnaire were more confident  
16 about their own OTC skills than those who had not used OTC medications in the year prior to the questionnaire  
17 (mean 3.84 respectively 3.24,  $p < 0.001$ ).  
18  
19  
20  
21  
22  
23  
24  
25  
26  
27  
28  
29  
30  
31  
32  
33  
34

### 35 **Attitudes towards availability**

36 Table 2 shows that the pharmacy is often mentioned as preferred channel where painkillers with the described  
37 profiles should be available (range 41% to 71%). For five out of the six profiles most respondents preferred that  
38 painkillers with such a profile should be available exclusively in pharmacies. Only 1% to 8% chose supermarkets  
39 or petrol stations as preferred option. ANOVAs and t-tests showed significant but modest differences between  
40 consumers' attitudes and age and level of education. Elderly ( $\geq 65$  years) were more restrictive in their  
41 preferences for availability than younger people. Moreover, people with a low level of education were more  
42 restrictive in their preferences than people with a middle and high level of education.  
43  
44  
45  
46  
47  
48  
49

50 The last research question focused on the association between consumers' confidence in their own OTC skills and  
51 their attitudes towards availability (see Table 3). The regression analysis showed that respondents who were more  
52 confident about their own OTC skills preferred OTC painkillers to be more generally available. This association  
53 was observed in addition to the effects of age and the level of education already mentioned. The association  
54 between own OTC skills and attitudes towards availability was also found when we performed an additional  
55  
56  
57  
58  
59  
60

1 regression analysis, in which we used the total number of times respondents scored the options ‘pharmacy only’  
2 and ‘prescription only’ as a dependent variable.  
3  
4  
5

## 7 **DISCUSSION**

### 9 **Principal findings**

11 Consumers feel confident about their own OTC skills, but they have less confidence in the OTC skills of others.  
12 In other words, consumers presume that, compared to themselves, other people are less able to use self-medication  
13 appropriately. Although consumers are confident, they are conservative in their attitudes towards the general  
14 availability of OTC painkillers. Most consumers prefer that painkillers with the described profiles (e.g.  
15 paracetamol and ibuprofen) should be available in pharmacies exclusively. Currently, painkillers with profiles  
16 similar to those described are available for general sale in most European countries, including the Netherlands.  
17 Finally, we observed that more confident consumers preferred OTC painkillers to be more generally available.  
18  
19  
20  
21  
22  
23  
24  
25  
26

### 27 **Comparisons with other studies**

28 There appears to be a discrepancy between our findings on the public perception about their own OTC skills and  
29 earlier research on the public awareness, perception and knowledge of OTC medication. While our study showed  
30 that consumers have high confidence in their own skills, previous studies found that, consumers are unaware of  
31 the fact that OTC medications can cause adverse events when used with other medications<sup>5;23</sup> and also of the  
32 toxicities of OTC medications<sup>4;14</sup>. Neither do they know, or are concerned, about the potential side effects of  
33 OTC analgesics<sup>13;14</sup>. They perceive OTC drugs as safe<sup>14;15</sup> and “too weak to cause any real harm”<sup>6</sup>. In addition, a  
34 recent study in Australia observed that fewer people are using NSAIDs appropriately according to the label, since  
35 ibuprofen has become available outside the pharmacy<sup>16</sup>. Summarized, while previous studies show that  
36 consumers seem to be unaware of how to use OTC medications appropriately our study shows that consumers are  
37 convinced they know how to use OTC medications appropriately. Yet, the confidence consumers have in the skills  
38 of others seems more consistent with the literature. It also probably better connects to reality, since, in general, the  
39 estimates of consumers regarding their peers’ attitudes and behaviours tend to be roughly accurate<sup>17</sup>. Moreover,  
40 the confidence consumers have in the skills of others is in line with their attitudes towards availability of OTC  
41 painkillers. It appears that consumers have taken into account in their attitudes the confidence, or lack of it, that  
42 they have in the OTC skills of others. The assumption of the Dutch government that consumers prefer a less  
43 restrictive availability is not supported by our findings when consumers are confronted with safety information on  
44  
45  
46  
47  
48  
49  
50  
51  
52  
53  
54  
55  
56  
57  
58  
59  
60

1 medication. Nevertheless, in many countries an increasing number of drugs that were previously only available on  
2 prescription have been switched to OTC status<sup>2,8;9</sup>.

### 8 **Implications**

9 Confidence in self-medication does not imply that the use of OTC medications is always optimal or appropriate  
10  
11<sup>24</sup>. The difference between consumers' confidence in their own skills compared to those of others indicate that  
12 some OTC users may be overconfident of their own OTC skills. This view is supported by the fact that consumers  
13 would like to limit the availability of OTC drugs with profiles that match currently widely available OTC drugs.  
14 This suggests that not all consumers are able to comprehend the proper use of OTC drugs which may entail health  
15 risks. For example, Leendertse et al. (2008)<sup>25</sup> observed that NSAIDs (amongst which also OTC drugs) are one of  
16 the medicines associated most often with potentially preventable medication-related hospital admissions.  
17 Moreover, Pirmohamed (2004)<sup>26</sup> observed that, among others, NSAIDs were most commonly implicated in  
18 admissions related to adverse drug reactions. Furthermore, a Dutch study showed that during the last decade there  
19 had been an increase in requests on paracetamol poisoning to the National Poisons Information Center<sup>27</sup>. There  
20 also have been some concerns regarding switching the status of prescription drugs to OTC availability. Examples  
21 of such concerns are an inaccurate diagnosis by patients and delay in obtaining medical assistance<sup>28</sup>. We were  
22 unable to link our results to the actual self-medication behaviour of the respondents. Therefore, further research is  
23 recommended to examine this.  
24  
25  
26  
27  
28  
29  
30  
31  
32  
33  
34  
35

36 The fact that inappropriate use of medication entails health risks led to recommendations to increase the risk  
37 awareness and knowledge among the public, and to educate them about OTC medication and its potential risks  
38  
39<sup>6;13;14;16;29</sup>. The question is whether people are either unable to understand and find the correct information, or  
40 whether they do not want, read, search or ask for this information. Therefore, it is not clear yet, how to increase  
41 public awareness. What seems clear is that consumers consider pharmacies as a safe environment, since most of  
42 them prefer the painkillers described to be available in pharmacies exclusively. This is confirmed in an earlier  
43 study where was found that Dutch consumers consider pharmacists as the most reliable source of information  
44 regarding OTC medication<sup>30</sup>. Although Dutch consumers expect to be provided with reliable information from  
45 pharmacies, it is possible that there are differences between pharmacies with regards to the quality of their advice.  
46 Furthermore, in 2010, 88% of the Dutch adult population put much or very much trust in pharmacists<sup>31</sup>. As a  
47 result, pharmacists can have an important role in questioning and informing patients about OTC medications.  
48  
49  
50  
51  
52  
53  
54  
55  
56  
57  
58  
59  
60

### **The strengths and limitations of the study**

This study addresses a relatively unexplored area. An important strength of our study is the large sample size and the response rate of almost 70%. However, the respondents in our study are not fully representative of the adult Dutch population aged 18 plus. Therefore, we performed analyses to see whether there are differences between groups of consumers. We observed some small but significant differences. However, they do not appear to affect our conclusions. We included an indirect measurement of the concept ‘attitudes towards availability’ in our questionnaire instead of asking directly where certain specific OTC painkillers should be available. Earlier research in the Netherlands demonstrated that when trade names of painkillers are presented to consumers, they judge them as safe. More than 95%, respectively 70%, of the consumers considered paracetamol and ibuprofen as safe, or very safe<sup>32</sup>. Unfortunately, we did not include direct as well as indirect measurements in our questionnaire, as we are now not able to make a comparison between both measurements. We also did not provide information on the pack sizes/quantity in the questionnaire. Providing such information might influence the attitudes towards availability of the respondents. It could, for example, be assumed that consumers prefer a more restrictive availability for larger pack sizes of OTC medicines. Another possible limitation might be that the study only relates to painkillers, albeit those are the most used OTCs in the Netherlands. Furthermore, we did not include internet as a channel in our questionnaire, because this study was part of a policy evaluation in which only the official Dutch sales channels were evaluated. With the increasing growth of internet pharmacy, it would be interesting to include this channel in further research. Another possible limitation is that we excluded quite a considerable number of respondents (N=228), because they did not fill out all six safety profiles. The excluded respondents were more restrictive in their preferences, possibly implying a slight underestimation of the observed effects in our analyses.

### **Conclusions**

This study aimed to examine consumers’ confidence in OTC skills and their attitudes towards the availability of OTC painkillers. The Dutch government assumed that consumers are well-informed, know how to use OTC medications appropriately, and prefer a wider availability. It could be questioned whether these assumptions are true. Consumers feel confident about their own OTC skills; however, they would prefer painkillers with safety profiles resembling currently available OTC painkillers, to be available as OTC in pharmacies exclusively. Furthermore, the confidence consumers have in the OTC skills of others seems more consistent with their attitudes towards availability. Until consumers themselves realise they are also one of the others, they may

1  
2  
3  
4  
5  
6  
7  
8  
9  
10  
11  
12  
13  
14  
15  
16  
17  
18  
19  
20  
21  
22  
23  
24  
25  
26  
27  
28  
29  
30  
31  
32  
33  
34  
35  
36  
37  
38  
39  
40  
41  
42  
43  
44  
45  
46  
47  
48  
49  
50  
51  
52  
53  
54  
55  
56  
57  
58  
59  
60

overestimate their OTC skills, which may entail health risks.

For peer review only

**Footnotes**

We thank the panel members of the Dutch Health Care Consumer Panel who participated in this study.

Preliminary results of part of this manuscript were presented at the 4<sup>th</sup> European Public Health Conference:

‘Public Health and Welfare – Welfare Development and Public Health’ from 9 to 12 November 2011,

Copenhagen. An abstract is available in the European Journal of Public Health, 21 (2011) suppl. 1, p 129.

Contributors: The study was devised and designed by LVD and MB. JDJ was responsible for the data collection in the Dutch Health Care Consumer Panel. AB performed the statistical analyses and drafted the manuscript. All other authors critically revised it. All authors gave their final approval for the manuscript version to be published. All authors are responsible for the overall content as guarantors.

Funding: Data collection of this study was funded by the Dutch Ministry of Health, Welfare and Sport. The funder had no role in the design, execution, and writing of the study.

Competing interests: All authors have completed the Unified Competing Interest form at [www.ijemje.org/coi\\_disclosure.pdf](http://www.ijemje.org/coi_disclosure.pdf) (available on request from the corresponding author) and declare: the authors received support for the data collection from the Dutch Ministry of Health, Welfare and Sport for the work submitted. AB and JDJ there was no financial relationship with any organisations that might have an interest in the submitted work in the previous three years. LVD received unrestricted grants from Bristol-Myers Squibb and Astra Zeneca for studies not related to this study in 2011 and 2012. MB performed occasional consultancy work for both organisations of pharmacists, druggists and government. And all authors that there was no other relationships or activities that could appear to have influenced the submitted work.

Ethical approval: According to the Dutch law, no ethical approval was needed. The protection of the collected data is registered with the Dutch Data Protection Authority (nr. 1262949).

Data sharing: Data is available on request and subject to approval by the programme committee of the Dutch Health Care Consumer Panel. The questionnaire (in Dutch) is available on request from the authors.

Exclusive licence: The Corresponding Author has the right to grant on behalf of all authors and does grant on behalf of all authors, an exclusive licence (or non exclusive for government employees) on a worldwide basis to the BMJ Publishing Group Ltd and its Licensees to permit this article (if accepted) to be published in BMJ editions and any other BMJ PGL products and sublicences to exploit all subsidiary rights, as set out in our licence.

## Reference List

- 1  
2  
3  
4 (1) Barber N. Drugs: from prescription only to pharmacy only. *BMJ* 1993; 307(6905):640.
- 5  
6 (2) Blenkinsopp A, Bradley C. Patients, society, and the increase in self medication. *BMJ* 1996;  
7  
8 312(7031):629-632.
- 9  
10 (3) Schoenemann JH, Muller-Oerlinghausen B, Munter KH, Enayati-Kashani S. Adverse drug  
11  
12 reactions (ADR) causing hospital admissions. *Pharmacoepidemiol Drug Saf* 1998; 7 Suppl 1:S1-  
13  
14 S3.
- 15  
16 (4) Huott MA, Storrow AB. A survey of adolescents' knowledge regarding toxicity of over-the-  
17  
18 counter medications. *Acad Emerg Med* 1997; 4(3):214-218.
- 19  
20 (5) Fendrick AM, Pan DE, Johnson GE. OTC analgesics and drug interactions: clinical implications.  
21  
22 *Osteopath Med Prim Care* 2008; 2:2.
- 23  
24 (6) Roumie CL, Griffin MR. Over-the-counter analgesics in older adults: a call for improved labelling  
25  
26 and consumer education. *Drugs Aging* 2004; 21(8):485-498.
- 27  
28 (7) Sheen CL, Dillon JF, Bateman DN, Simpson KJ, Macdonald TM. Paracetamol toxicity:  
29  
30 epidemiology, prevention and costs to the health-care system. *QJM* 2002; 95(9):609-619.
- 31  
32 (8) Hanna LA, Hughes CM. Public's views on making decisions about over-the-counter medication  
33  
34 and their attitudes towards evidence of effectiveness: a cross-sectional questionnaire study. *Patient*  
35  
36 *Educ Couns* 2011; 83(3):345-351.
- 37  
38 (9) Francis SA, Barnett N, Denham M. Switching of prescription drugs to over-the-counter status: is it  
39  
40 a good thing for the elderly? *Drugs Aging* 2005; 22(5):361-370.
- 41  
42 (10) US Government Accountability Office. Nonprescription drugs: Considerations regarding a behind-  
43  
44 the-counter drug class. Washington: 2009.
- 45  
46 (11) Van Dijk L, Van der Maat M, Salimans R, Bouvy M. De balans tussen verkrijgbaarheid en  
47  
48 veiligheid. Evaluatie van de indeling van zelfzorggeneesmiddelen en de rol van drogist en  
49  
50 apotheek bij de verstrekking. Utrecht: NIVEL; 2010.
- 51  
52 (12) Van Dijk L, Vervloet M, Plas M, Breuning E, Van den Ende E. Negatieve effecten van normaal en  
53  
54 verkeerd gebruik van geneesmiddelen. Een literatuurstudie. Utrecht: NIVEL; 2005.
- 55  
56 (13) Cham E, Hall L, Ernst AA, Weiss SJ. Awareness and use of over-the-counter pain medications: a  
57  
58 survey of emergency department patients. *South Med J* 2002; 95(5):529-535.
- 59  
60

- 1  
2  
3  
4  
5  
6  
7  
8  
9  
10  
11  
12  
13  
14  
15  
16  
17  
18  
19  
20  
21  
22  
23  
24  
25  
26  
27  
28  
29  
30  
31  
32  
33  
34  
35  
36  
37  
38  
39  
40  
41  
42  
43  
44  
45  
46  
47  
48  
49  
50  
51  
52  
53  
54  
55  
56  
57  
58  
59  
60
- (14) Wilcox CM, Cryer B, Triadafilopoulos G. Patterns of use and public perception of over-the-counter pain relievers: focus on nonsteroidal antiinflammatory drugs. *J Rheumatol* 2005; 32(11):2218-2224.
- (15) Clark D, Layton D, Shakir SA. Monitoring the safety of over the counter drugs. We need a better way than spontaneous reports. *BMJ* 2001; 323(7315):706-707.
- (16) Stosic R, Dunagan F, Palmer H, Fowler T, Adams I. Responsible self-medication: perceived risks and benefits of over-the-counter analgesic use. *Int J Pharm Pract* 2011; 19(4):236-245.
- (17) Balcetis E, Dunning D. Considering the situation: Why people are better social psychologists than self-psychologists. *Self and Identity* 2011.
- (18) Brabers AEM, Reitsma-van Rooijen M, De Jong JD. Consumentenpanel Gezondheidszorg. Basisrapport met informatie over het panel (2012). Utrecht: NIVEL; 2012.
- (19) Reitsma-van RM, de Jong JD, Rijken M. Regulated competition in health care: switching and barriers to switching in the Dutch health insurance system. *BMC Health Serv Res* 2011; 11:95.
- (20) de Jong JD, Brink-Muinen A, Groenewegen PP. The Dutch health insurance reform: switching between insurers, a comparison between the general population and the chronically ill and disabled. *BMC Health Serv Res* 2008; 8:58.
- (21) Singh G. Gastrointestinal complications of prescription and over-the-counter nonsteroidal anti-inflammatory drugs: a view from the ARAMIS database. *Arthritis, Rheumatism, and Aging Medical Information System. Am J Ther* 2000; 7(2):115-121.
- (22) Butt JH, Barthel JS, Moore RA. Clinical spectrum of the upper gastrointestinal effects of nonsteroidal anti-inflammatory drugs. Natural history, symptomatology, and significance. *Am J Med* 1988; 84(2A):5-14.
- (23) Indermitte J, Reber D, Beutler M, Bruppacher R, Hersberger KE. Prevalence and patient awareness of selected potential drug interactions with self-medication. *J Clin Pharm Ther* 2007; 32(2):149-159.
- (24) Hughes CM, McElnay JC, Fleming GF. Benefits and risks of self medication. *Drug Saf* 2001; 24(14):1027-1037.



- 1  
2  
3  
4  
5  
6  
7  
8  
9  
10  
11  
12  
13  
14  
15  
16  
17  
18  
19  
20  
21  
22  
23  
24  
25  
26  
27  
28  
29  
30  
31  
32  
33  
34  
35  
36
- (25) Leendertse AJ, Egberts AC, Stoker LJ, van den Bemt PM. Frequency of and risk factors for preventable medication-related hospital admissions in the Netherlands. *Arch Intern Med* 2008; 168(17):1890-1896.
- (26) Pirmohamed M, James S, Meakin S, Green C, Scott AK, Walley TJ et al. Adverse drug reactions as cause of admission to hospital: prospective analysis of 18 820 patients. *BMJ* 2004; 329(7456):15-19.
- (27) Van Dijk L, Van der Maat M, Bouvy M. Zelfzorggeneesmiddelen: actieve voorlichting over zelfzorg nodig. Aantal paracetamolvergiftigingen gestegen. *Pharmaceutisch Weekblad* 2010; 146(51-52):18-20.
- (28) Brass EP. Changing the status of drugs from prescription to over-the-counter availability. *N Engl J Med* 2001; 345(11):810-816.
- (29) Calamusa A, Di MA, Cristofani R, Arrighetti P, Santaniello V, Alfani S et al. Factors that influence Italian consumers' understanding of over-the-counter medicines and risk perception. *Patient Educ Couns* 2012; 87(3):395-401.
- (30) Brinkman A.C.A., Vervloet M, Van Dijk, Dute J.C.J., Kabel J.J.C., Friele R.D. Evaluatie reclamebesluit geneesmiddelen. 2008.
- (31) Brabers AEM, Reitsma-van Rooijen M, De Jong JD. Barometer Vertrouwen in de gezondheidszorg. 14-8-2013. [www.nivel.nl/consumentenpanel-gezondheidszorg](http://www.nivel.nl/consumentenpanel-gezondheidszorg).

37 Ref Type: Online Source

- 38  
39  
40  
41  
42  
43  
44  
45  
46  
47  
48  
49  
50  
51  
52  
53  
54  
55  
56  
57  
58  
59  
60
- (32) TNS/Nipo. Advisering bij zelfzorgeneesmiddelen in drogisterijen. Amsterdam: 2010.

1  
2  
3  
4  
5 **Tables and figures**  
6

7 *Table 1: Demographic characteristics of the respondents and the Dutch population aged 18 years and older*  
8

|                                                        | Respondents |      | Dutch population aged 18 years and older* |      |
|--------------------------------------------------------|-------------|------|-------------------------------------------|------|
|                                                        | N           | %    | %                                         |      |
| <b>Gender</b>                                          | <b>972</b>  |      |                                           |      |
| Male                                                   | 424         | 43.6 | 49.0                                      |      |
| Female                                                 | 548         | 56.4 | 51.0                                      |      |
| <b>Age</b>                                             | <b>972</b>  |      |                                           |      |
| 18-39 years                                            | 88          | 9.1  | 35.3                                      |      |
| 40-64 years                                            | 527         | 54.2 | 45.3                                      |      |
| 65 years and older                                     | 357         | 36.7 | 19.5                                      |      |
| <b>Education</b>                                       | <b>948</b>  |      |                                           |      |
| Low (none, primary school or pre-vocational education) | 184         | 19.4 | 33.8                                      |      |
| Middle (secondary or vocational education)             | 448         | 47.3 | 40.5                                      |      |
| High (professional higher education or university)     | 316         | 33.3 | 25.7                                      |      |
| <b>Self-reported general health</b>                    | <b>965</b>  |      |                                           |      |
| Poor/bad                                               | 175         | 18.1 | Less than good**                          | 18.6 |
| Good                                                   | 487         | 50.5 | Good                                      | 52.7 |
| Excellent/very good                                    | 303         | 31.4 | Very good                                 | 28.8 |
| <b>Working in healthcare</b>                           | <b>919</b>  |      |                                           |      |
| No, never worked in healthcare                         | 663         | 72.1 | Not available                             |      |
| Yes, I am currently working in healthcare              | 119         | 13.0 | Not available                             |      |
| Yes, I have worked in healthcare in the past           | 137         | 14.9 | Not available                             |      |

1  
2  
3  
4  
5  
6  
7  
8  
9  
10  
11  
12  
13  
14  
15  
16  
17  
18  
19  
20  
21  
22  
23  
24  
25  
26  
27  
28  
29  
30  
31  
32  
33  
34  
35  
36  
37  
38  
39  
40  
41  
42  
43  
44  
45  
46  
47  
48  
49

| Use of OTC drugs in the year prior to the questionnaire | 960 |      |               |
|---------------------------------------------------------|-----|------|---------------|
| No                                                      | 160 | 16.7 | Not available |
| Yes                                                     | 800 | 83.3 | Not available |

\* Data of the Dutch population aged 18 years and older is based on information from Statistics Netherland.

\*\* Statistics Netherlands has three categories of self-reported general health. The percentage of Statistics Netherlands relate to the overall health of the entire general population, including those under 18 years.

Table 2: Percentage of respondents that prefer a specific channel with regards to the availability of OTC painkillers

| Safety profiles*                                                                                                                               | N   | Percentage of respondents that prefer a channel |         |                  |                      | Mean score **<br>(95% CI)     |
|------------------------------------------------------------------------------------------------------------------------------------------------|-----|-------------------------------------------------|---------|------------------|----------------------|-------------------------------|
|                                                                                                                                                |     | Supermarket/<br>petrol station                  | Chemist | Pharmacy<br>only | Prescription<br>only |                               |
| Safe when used normally, but potentially serious side effects when used in combination with certain prescription drugs                         | 876 | 1.1                                             | 7.4     | 70.8             | 20.7                 | <b>3.11</b><br>(3.07 to 3.15) |
| Can be used safely by most people, but potentially serious side effects when used by elderly people and those with severe concomitant diseases | 875 | 1.0                                             | 12.6    | 65.3             | 21.1                 | <b>3.07</b><br>(3.02 to 3.11) |
| Can be used safely by most people, but potentially serious side effects when used by children                                                  | 859 | 2.2                                             | 18.6    | 59.6             | 19.6                 | <b>2.97</b><br>(2.92 to 3.01) |
| In rare cases (less than 1 per 1,000) people suffer serious side effects, like gastrointestinal bleedings                                      | 848 | 3.5                                             | 25.4    | 52.7             | 18.4                 | <b>2.86</b><br>(2.81 to 2.91) |
| No side effects when used as directed, but taking too many tablets can cause serious damage                                                    | 813 | 8.1                                             | 34.0    | 46.0             | 11.9                 | <b>2.62</b><br>(2.56 to 2.67) |
| Mild side effects, such as stomach and intestinal problems, but never serious side effects                                                     | 841 | 4.8                                             | 45.3    | 40.7             | 9.3                  | <b>2.54</b><br>(2.50 to 2.59) |

\* Safety profiles are ordered based on their mean score. In the questionnaire, they were ordered in another way.

\*\* Ranging from 1 to 4 (1 = wide availability; 4 = restrictive availability).

Table 3: Regression model for attitudes towards availability (N=672)

|                                                                                                                              | Beta*           | P-value      |
|------------------------------------------------------------------------------------------------------------------------------|-----------------|--------------|
| <b>Availability</b> (1= wide; 4 = restrictive)                                                                               |                 |              |
| <b>Confidence</b> (1 = low; 5 = high)                                                                                        | -0.114          | <b>0.005</b> |
| <b>Gender</b> (0 = man; 1 = woman)                                                                                           | 0.010           | 0.807        |
| <b>Age</b>                                                                                                                   | 0.102           | <b>0.012</b> |
| <b>Level of education</b>                                                                                                    |                 |              |
| -Low                                                                                                                         | reference level |              |
| -Middle                                                                                                                      | -0.118          | <b>0.024</b> |
| -High                                                                                                                        | -0.242          | <b>0.000</b> |
| <b>Self-reported general health</b>                                                                                          |                 |              |
| -Bad/poor                                                                                                                    | reference level |              |
| -Good                                                                                                                        | 0.028           | 0.599        |
| -Excellent/very good                                                                                                         | -0.011          | 0.838        |
| <b>Work in healthcare</b> (0 = never worked in healthcare; 1 = currently working in healthcare/worked in healthcare in past) | -0.038          | 0.358        |
| <b>Use of OTC drugs in year prior to questionnaire</b> (0 = no; 1 = yes)                                                     | -0.010          | 0.813        |
| <b>Constant</b>                                                                                                              | .               | <b>0.000</b> |

Adjusted R-square: 0.07

\* Standardized coefficients

Figure 1: Consumers' confidence in their own OTC skills and in the OTC skills of others

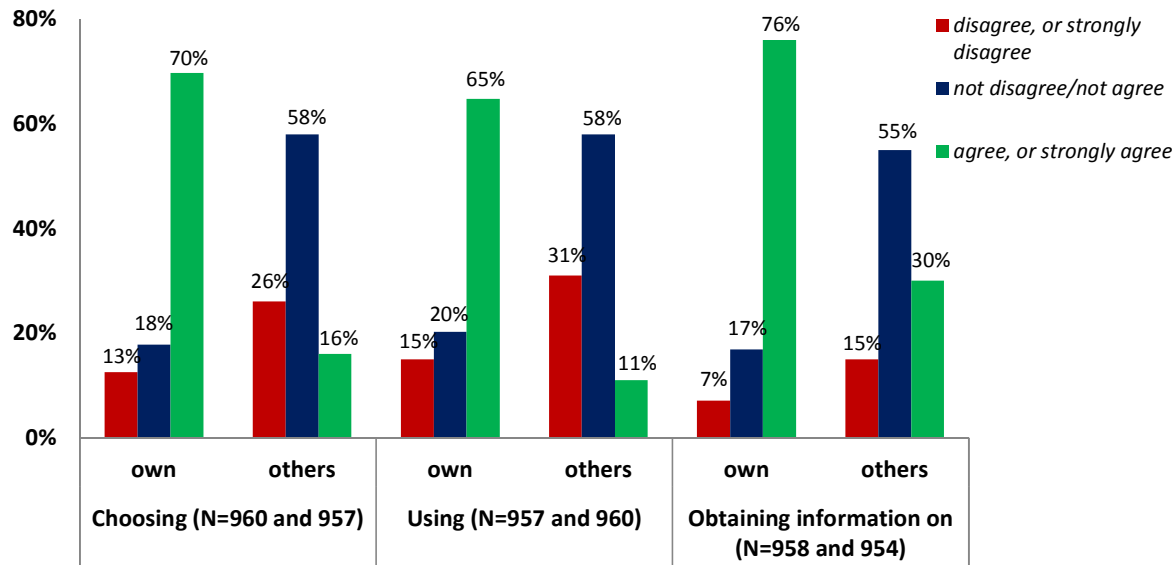

**Choosing:** I am / others are able to make an appropriate choice between different types and brands of OTC drugs

**Using:** I / others know exactly how to use OTC drugs in a safe way

**Obtaining information on:** When I / others try to get advice on OTC drugs, I / others can easily get the right information

STROBE 2007 (v4) Statement—Checklist of items that should be included in reports of cross-sectional studies

| Section/Topic             | Item # | Recommendation                                                                                                                                                                       | Reported on page #                                  |
|---------------------------|--------|--------------------------------------------------------------------------------------------------------------------------------------------------------------------------------------|-----------------------------------------------------|
| Title and abstract        | 1      | (a) Indicate the study’s design with a commonly used term in the title or the abstract                                                                                               | page 1                                              |
|                           |        | (b) Provide in the abstract an informative and balanced summary of what was done and what was found                                                                                  | page 2 & 3 (Article Summary)                        |
| <b>Introduction</b>       |        |                                                                                                                                                                                      |                                                     |
| Background/rationale      | 2      | Explain the scientific background and rationale for the investigation being reported                                                                                                 | page 4                                              |
| Objectives                | 3      | State specific objectives, including any prespecified hypotheses                                                                                                                     | page 4 & 5                                          |
| <b>Methods</b>            |        |                                                                                                                                                                                      |                                                     |
| Study design              | 4      | Present key elements of study design early in the paper                                                                                                                              | page 5 & 6                                          |
| Setting                   | 5      | Describe the setting, locations, and relevant dates, including periods of recruitment, exposure, follow-up, and data collection                                                      | page 5 & 6<br>(Data collection in June & July 2010) |
| Participants              | 6      | (a) Give the eligibility criteria, and the sources and methods of selection of participants                                                                                          | page 5                                              |
| Variables                 | 7      | Clearly define all outcomes, exposures, predictors, potential confounders, and effect modifiers. Give diagnostic criteria, if applicable                                             | page 6 & 7                                          |
| Data sources/ measurement | 8*     | For each variable of interest, give sources of data and details of methods of assessment (measurement). Describe comparability of assessment methods if there is more than one group | page 6 & 7                                          |
| Bias                      | 9      | Describe any efforts to address potential sources of bias                                                                                                                            | page 5                                              |
| Study size                | 10     | Explain how the study size was arrived at                                                                                                                                            | page 5                                              |
| Quantitative variables    | 11     | Explain how quantitative variables were handled in the analyses. If applicable, describe which groupings were chosen and why                                                         | page 8                                              |
| Statistical methods       | 12     | (a) Describe all statistical methods, including those used to control for confounding                                                                                                | page 8                                              |
|                           |        | (b) Describe any methods used to examine subgroups and interactions                                                                                                                  | page 8                                              |
|                           |        | (c) Explain how missing data were addressed                                                                                                                                          | page 6 & 7                                          |
|                           |        | (d) If applicable, describe analytical methods taking account of sampling strategy                                                                                                   | NA                                                  |

|                          |     |                                                                                                                                                                                                              |                                                                                  |
|--------------------------|-----|--------------------------------------------------------------------------------------------------------------------------------------------------------------------------------------------------------------|----------------------------------------------------------------------------------|
|                          |     | (e) Describe any sensitivity analyses                                                                                                                                                                        | page 8                                                                           |
| <b>Results</b>           |     |                                                                                                                                                                                                              |                                                                                  |
| Participants             | 13* | (a) Report numbers of individuals at each stage of study—eg numbers potentially eligible, examined for eligibility, confirmed eligible, included in the study, completing follow-up, and analysed            | page 5                                                                           |
|                          |     | (b) Give reasons for non-participation at each stage                                                                                                                                                         | NA                                                                               |
|                          |     | (c) Consider use of a flow diagram                                                                                                                                                                           | NA                                                                               |
| Descriptive data         | 14* | (a) Give characteristics of study participants (eg demographic, clinical, social) and information on exposures and potential confounders                                                                     | See table 1 (page 18 & 19) & page 8                                              |
|                          |     | (b) Indicate number of participants with missing data for each variable of interest                                                                                                                          | See table 1 (page 18 & 19), table 2 (page 20), figure 1 (page 22) and page 6 & 7 |
| Outcome data             | 15* | Report numbers of outcome events or summary measures                                                                                                                                                         | page 8, 9 & 10                                                                   |
| Main results             | 16  | (a) Give unadjusted estimates and, if applicable, confounder-adjusted estimates and their precision (eg, 95% confidence interval). Make clear which confounders were adjusted for and why they were included | NA                                                                               |
|                          |     | (b) Report category boundaries when continuous variables were categorized                                                                                                                                    | See table 1 (page 18 & 19)                                                       |
|                          |     | (c) If relevant, consider translating estimates of relative risk into absolute risk for a meaningful time period                                                                                             | NA                                                                               |
| Other analyses           | 17  | Report other analyses done—eg analyses of subgroups and interactions, and sensitivity analyses                                                                                                               | page 8, 9 & 10                                                                   |
| <b>Discussion</b>        |     |                                                                                                                                                                                                              |                                                                                  |
| Key results              | 18  | Summarise key results with reference to study objectives                                                                                                                                                     | page 10                                                                          |
| Limitations              | 19  | Discuss limitations of the study, taking into account sources of potential bias or imprecision. Discuss both direction and magnitude of any potential bias                                                   | page 11, 12 & 13                                                                 |
| Interpretation           | 20  | Give a cautious overall interpretation of results considering objectives, limitations, multiplicity of analyses, results from similar studies, and other relevant evidence                                   | page 10, 11, 12 & 13                                                             |
| Generalisability         | 21  | Discuss the generalisability (external validity) of the study results                                                                                                                                        | page 12                                                                          |
| <b>Other information</b> |     |                                                                                                                                                                                                              |                                                                                  |
| Funding                  | 22  | Give the source of funding and the role of the funders for the present study and, if applicable, for the original study on which the present article is based                                                | page 14                                                                          |

\*Give information separately for cases and controls in case-control studies and, if applicable, for exposed and unexposed groups in cohort and cross-sectional studies.



1  
2  
3  
4  
5  
6  
7  
8  
9  
10  
11  
12  
13  
14  
15  
16  
17  
18  
19  
20  
21  
22  
23  
24  
25  
26  
27  
28  
29  
30  
31  
32  
33  
34  
35  
36  
37  
38  
39  
40  
41  
42  
43  
44  
45  
46  
47  
48  
49

**Note:** An Explanation and Elaboration article discusses each checklist item and gives methodological background and published examples of transparent reporting. The STROBE checklist is best used in conjunction with this article (freely available on the Web sites of PLoS Medicine at <http://www.plosmedicine.org/>, Annals of Internal Medicine at <http://www.annals.org/>, and Epidemiology at <http://www.epidem.com/>). Information on the STROBE Initiative is available at [www.strobe-statement.org](http://www.strobe-statement.org).

For peer review only

## WHERE TO BUY OTC MEDICATIONS?

A cross-sectional survey investigating consumers' confidence in over-the-counter (OTC) skills and their attitudes towards the availability of OTC [analgesics/painkillers](#).

Brabers AEM<sup>1§</sup>, Van Dijk L<sup>1</sup>, Bouvy ML<sup>23</sup>, De Jong JD<sup>1</sup>

<sup>1</sup> NIVEL, Netherlands Institute for Health Services Research, PO Box 1568, 3500 BN Utrecht, the Netherlands

<sup>2</sup> Division Pharmacoepidemiology & Clinical Pharmacology, Utrecht Institute for Pharmaceutical Sciences (UIPS), PO Box 80082, 3500 TB Utrecht, the Netherlands

<sup>3</sup> SIR Institute for Pharmacy Practice and Policy, Theda Mansholtstraat 5b, 2331 JE Leiden, the Netherlands

§ Corresponding author

Contact address corresponding author:

PO Box 1568, 3500 BN Utrecht, the Netherlands

Email addresses:

AB: [a.brabers@nivel.nl](mailto:a.brabers@nivel.nl)

LVD: [l.vandijk@nivel.nl](mailto:l.vandijk@nivel.nl)

MB: [m.l.bouvy@uu.nl](mailto:m.l.bouvy@uu.nl)

JDJ: [j.dejong@nivel.nl](mailto:j.dejong@nivel.nl)

Main work positions:

AB: Junior researcher NIVEL

LVD: Programme co-ordinator NIVEL

MB: Professor of Pharmaceutical Care, Division of Pharmacoepidemiology & Clinical Pharmacology, Utrecht Institute for Pharmaceutical Sciences (UIPS)

JDJ: Programme co-ordinator NIVEL

**ABSTRACT**

**Objective:** To examine consumers' confidence in their own, and also in other people's, over-the-counter (OTC) skills and to ~~look too at~~ describe their attitudes towards the availability of OTC ~~analgesies~~ painkillers. Moreover we examined the association between confidence in OTC skills and attitudes.

**Design:** Cross-sectional survey. ~~Mixed mode questionnaire.~~ Mixed methods (postal and electronic) self-administered questionnaire.

**Participants:** Members of the Dutch Health Care Consumer Panel ~~of whom 972 returned the questionnaire (response 68%).~~

**Main outcome measures:** Consumers' confidence in their own, and in other people's, OTC skills was examined.

~~This is because, generally, people are roughly accurate when estimating peers' attitudes and behaviours.~~

Confidence was measured by three questions regarding obtaining information on, choosing, and using OTC medication. Consumers' attitudes towards availability were assessed using six safety profiles, by asking which channel consumers prefer for each profile. ~~Respondents had to indicate which channel they prefer for each profile.~~

**Results:** The response rate was 68% (N=972). Consumers feel confident about their own OTC skills (mean 3.74; 95% CI 3.69 to 3.79, on a 5-point Likert scale), but have less confidence in OTC skills of others (mean 2.92; 95% CI 2.88 to 2.96). Consumers are conservative in their attitudes towards the availability of OTC ~~analgesies~~ painkillers. Most consumers prefer ~~analgesies~~ painkillers to be available exclusively in pharmacies (41 to 71% per profile indicated pharmacy only). Moreover, there is an association between confidence in OTC skills and attitudes ( $p=0.0053$ ;  $\beta=-0.1145$ ). Consumers who are more confident about their own OTC skills prefer OTC ~~analgesies~~ painkillers to be more generally available.

**Conclusions:** Consumers feel confident about their own OTC skills. However, they would prefer ~~analgesies~~ painkillers with safety profiles resembling those currently available OTC, to be available as OTC in pharmacies exclusively. Consumers' confidence in the OTC skills of others is more consistent with their attitudes towards availability of OTC ~~analgesies~~ painkillers. Until consumers themselves realise they are also one of the others, they may overestimate their own OTC skills, which may entail health risks.

## Article summary

### Article focus

- Several studies have observed that consumers appear to be unaware of how to use OTC medications appropriately, which may entail health risks.
- Until now little is known about consumers' confidence in their own and other people's OTC skills and their attitudes towards the availability of OTC ~~analgesics~~[painkillers](#).
- This study aimed to examine consumers' confidence in both their own, and ~~also~~ in other people's, OTC skills, to look too at their attitudes towards the availability of OTC ~~painkillers~~[analgesics](#), and to examine the association between confidence in OTC skills and attitudes.

### Key messages

- Consumers feel confident about their own OTC skills. However, they ~~would~~ prefer that ~~painkillers~~[analgesics](#) with safety profiles resembling those currently available OTC, to be available as OTC in pharmacies exclusively.
- Consumers have less confidence in the OTC skills of others. This perception is more consistent with their attitudes towards availability of OTC ~~painkillers~~[analgesics](#).
- Until consumers themselves realise they are also one of the others, they may overestimate their own OTC skills, which may entail health risks.

### Strengths and limitations of this study

- Strengths include the large sample size and the response rate of almost 70% and the inclusion of an indirect measurement of the concept 'attitudes towards availability' in our questionnaire instead of asking directly where certain specific OTC ~~painkillers~~[analgesics](#) should be available. Another strength is that this study addresses a relatively unexplored area.
- Limitations include not being able to make a comparison between a direct as well as indirect measurements and not being able to link our results to the actual self-medication behaviour of the respondents, ~~since we do not know what they do and buy.~~ In addition, the study only relates to painkillers, the most used OTCs in the Netherlands.

## BACKGROUND

The need to save on health care spending [and the trend to enhance self care have](#) led to more emphasis on patients taking their own responsibility for the management of minor ailments, including the use of medication that is available without a prescription <sup>1,2</sup>. [Today, a wide range of conditions can be treated using medications that are available OTC. Some examples of categories of medicines that have been reclassified to non-prescription medication in many countries are NSAIDs, anti fungal creams and laxatives.](#) However, inappropriate use of OTC medications entails considerable health risks. Several studies demonstrated that inappropriate use results in drug intoxication, drug interactions, side effects and increased health care costs as a consequence of extra visits to a doctor and hospitalization <sup>3-7</sup>. Nevertheless, in many countries, increasingly more drugs that were previously only available on prescription are being switched to OTC status <sup>2,8,9</sup>. A study of the US Government Accountability Office conducted in the UK, the USA, the Netherlands, Italy and Australia, showed that since 1995 all these countries have increased OTC availability. This is due either to changes in the classification of non-prescription drugs or to the reclassification of medications into less restrictive classes <sup>10</sup>.

In the Netherlands, the availability of OTC drugs increased when the Dutch government changed the system for OTC medications. [The Dutch healthcare policy is based on ideas that independent and critical consumers require an increased availability of OTC medication in order to select a particular drug themselves.](#) Since the introduction of the Medicines Act on 1 July 2007, three categories of non-prescription drugs have been specified: 1) pharmacy only; 2) pharmacy [or chemist](#) only ~~and chemist~~; and 3) general sales <sup>11</sup>. Before July 2007, the third category did not exist. In the Netherlands, there is a distinction between pharmacies and chemists. Pharmacies are run by a pharmacist and able to sell all prescription and non-prescription drugs, while chemists are run by a druggist, who requires less training than a pharmacist and is able to sell many but not all non-prescription drugs <sup>10</sup>. When introducing the new legislation, the Dutch government argued that consumers are well-informed and know how to use OTC drugs appropriately <sup>11,12</sup>. This assumption was not supported by international literature. Earlier research, mainly focused on analgesics, observed that consumers appear to be unaware of how to use OTC medications appropriately <sup>4-6,13-16</sup>.

There has been little research conducted into how consumers themselves perceive their skills in using OTC medications appropriately. It is important to gain some insight into areas such as overestimating OTC skills as this may result in risks to health. The purpose of the present study was to examine consumers' confidence in OTC

1 skills. We examined consumers' confidence, both in their own OTC skills, and in those of others. This is because  
2 previous research has shown that "people tend to think positively of themselves, often to unrealistic degrees"<sup>17</sup>.  
3 Moreover, the literature demonstrated that consumers' estimates of their peers' attitudes and behaviours tend to be  
4 roughly accurate<sup>17</sup>. Furthermore, we examined which channels consumers prefer with regard to the availability of  
5 OTC [painkillersanalgesics](#). Finally, we examined the association between consumers' confidence in OTC skills  
6 and their attitudes towards the availability of OTC [painkillersanalgesics](#), as we expected that more confident  
7 consumers prefer them to be more generally available.  
8

## 17 METHODS

### 19 Setting

20 Data were collected in the Dutch Health Care Consumer Panel<sup>18-20</sup>. This panel aims to measure opinions on and  
21 knowledge of health care as well as expectations and experiences with health care at a national level. [At the time  
22 of the study \(June 2010\), the Consumer Panel consisted of approximately 3,000 people aged 18 years and older.  
23 Each individual member of the panel receives a questionnaire approximately three times a year and can quite the  
24 panel any time. There is no possibility for consumers to sign up for the panel on their own initiative. The panel is  
25 renewed on regular base. Renewal is necessary to make sure that members do not develop specific knowledge of,  
26 and attention for, health care issues, and that no questionnaire-fatigue occurs. Moreover, renewal compensates for  
27 panel members who, for example, have died or moved without informing us about the new address. To recruit  
28 new panel members an address file is bought from an address supplier. As a result, possible new members are  
29 sampled at random from the general population in the Netherlands. Sampled people receive an information letter  
30 about the panel and are called within a week after receiving that letter. If they are interested, they receive a  
31 questionnaire on their demographic characteristics. When that questionnaire is returned, they are considered  
32 members of the panel.](#) The demographic characteristics of the panel members including their age, gender, level of  
33 education, ~~and~~ self-reported general health [and whether they work\(ed\) or never worked in healthcare are were](#)  
34 documented at the start of the panel membership and are updated annually. [Data are anonymously processed, and  
35 the](#) protection of the data collected is registered with the Dutch Data Protection Authority (nr. 1262949).  
36  
37  
38  
39  
40  
41  
42  
43  
44  
45  
46  
47  
48  
49  
50  
51

### 54 Questionnaire

55 In June 2010, a [self-administered](#) questionnaire was sent to 1,422 panel members and returned by 972 members.  
56 According to their previously stated preference, 671 members received a questionnaire by post and 751 through  
57  
58  
59  
60

1 the internet. [In total, the questionnaire included 36 questions focusing on different aspects of OTC medications.](#)  
2  
3 [To increase the response from the onset, two electronic reminders and one postal reminder were sent to panel](#)  
4 [members who had not responded yet.](#)  
5  
6  
7

### 8 9 10 11 The use of OTC drugs

12 The respondents were asked how long it has been since they had used OTC medications. [OTC medications were](#)  
13 [defined in the questionnaire as follows: “OTC medications are medicines that you can buy at pharmacies and](#)  
14 [chemists without a doctors’ prescription. In addition, you can buy some of these medicines at supermarkets and](#)  
15 [petrol stations. Examples of OTC medications are painkillers, such as paracetamol or ibuprofen. Homeopathic](#)  
16 [medicines, nutritional supplements and contraceptives are not considered to be OTC medications”.](#) Based on their  
17 answers, we generated a dichotomous variable for the use of OTC drugs in the year prior to the questionnaire  
18 (1=yes; 0=no). In addition, the respondents who had used OTC drugs in the year prior to the questionnaire were  
19 asked what kind of [categories \(pre-defined\) of](#) OTC drugs they had used in that year. All questions had pre-  
20 defined categories of answers.  
21  
22  
23  
24  
25  
26  
27  
28  
29  
30  
31  
32

### 33 Confidence

34 Confidence was measured using three questions with regard to obtaining information on, choosing and using OTC  
35 medications. These were: 1) ‘I am able to make [an appropriate](#) choice between different types and brands of OTC  
36 drugs’; 2) ‘I know exactly how to use OTC drugs in a safe way’; and 3) ‘When I try to get advice on OTC drugs, I  
37 can easily get the right information’. We used the same three items to examine consumers’ confidence in the OTC  
38 skills of others, for example asking if: ‘Others are able to make [an appropriate](#) choice between different types and  
39 brands of OTC drugs’. All items had a five-point Likert scale ranging from strongly disagrees to strongly agree.  
40 We evaluated for both scales whether the three items measured a single concept by calculating the internal  
41 consistency given by Cronbach’s alpha. Only the respondents who filled out all three items were included (own:  
42 N=951; others: N=949). The internal consistency was good (for both scales Cronbach’s alpha 0.81).  
43 Subsequently, a mean score was calculated for the respondents who filled out all three items ranging from 1 to 5,  
44 in which higher scores indicated greater confidence.  
45  
46  
47  
48  
49  
50  
51  
52  
53  
54  
55  
56  
57

### 58 Attitudes towards availability

1 We presented six safety profiles of [painkillers analgesics](#) in order to assess consumers' attitudes towards  
2 availability. Each profile described an [painkiller analgesic](#) having properties that resemble current available  
3 [painkillersanalgesics](#) in the Netherlands (e.g. paracetamol and ibuprofen). The profiles were descriptions of  
4 possible adverse effects of their use, inappropriately or not, and were based on information reflected in patient  
5 information leaflets [and summaries of product characteristics](#). They were constructed by one of the research  
6 members (MB), who is a pharmacist with special interest in OTC medication and author of a standard Dutch  
7 handbook of self-medication. We focused on OTC [painkillersanalgesics](#) because [painkillersanalgesics](#) are among  
8 the most commonly used medications <sup>14;16;21</sup>, and their inappropriate use can cause serious side effects <sup>5;6;13;21;22</sup>.  
9 The following six safety profiles were included: 1) 'No side effects when used as directed, but taking too many  
10 tablets can cause serious damage'; 2) 'Mild side effects, such as stomach and intestinal problems, but never  
11 serious side effects'; 3) 'In rare cases (less than 1 per 1,000) people suffer serious side effects, like gastrointestinal  
12 bleeding'; 4) 'Safe when used normally, but potentially serious side effects when used in combination with  
13 certain prescription drugs'; 5) 'Can be used safely by most people, but potentially serious side effects when used  
14 by elderly people and those with severe concomitant diseases'; and 6) 'Can be used safely by most people, but  
15 potentially serious side effects when used by children'. We asked respondents to indicate their preferences for [the](#)  
16 [availability where of analgesics-painkillers](#) with the above described profiles [should be available](#), with the  
17 following options: [1\) general sales \(defined in the questionnaire as supermarket / petrol station\)](#); [2\) chemist](#); [3\)](#)  
18 [pharmacy only](#); and [4\) prescription only](#). It should be noted that in the questionnaire the options were used in a  
19 different order, namely: [1\) pharmacy only](#); [2\) chemist](#); [3\) general sales](#); and [4\) prescription only](#). The answer  
20 options were based on the Dutch Medicines Act. [The options were scored as 1 general sales; 2 chemist; 3](#)  
21 [pharmacy only; and 4 prescription only](#). In addition, items scored as, 'I don't know', were recoded as missing (in  
22 total 115 times, 16 to 25 per profile). To evaluate whether the six items measured a single concept, we calculated  
23 the internal consistency given by Cronbach's alpha. Respondents who did not fill out all profiles were excluded  
24 from the analyses (excluded N=228, included N=744). The excluded respondents did not differ significantly from  
25 the respondents included with regard to their demographics. However, they were significantly more restrictive in  
26 their preferences for the safety profiles for which they did provide an answer. Factor analysis of the data identified  
27 one factor and the internal consistency was good (Cronbach's alpha 0.77). Subsequently, a mean score was  
28 calculated for the items for the respondents who filled out all six profiles ranging from 1 to 4, whereby higher  
29 scores indicated a greater preference for restricting availability.



## Statistical analyses

Firstly, we performed descriptive statistics. Then, by means of t-tests and one-way analyses of variance (ANOVA) ( $p < 0.01$ ), we tested the association between the outcomes (consumers' confidence in their own OTC skills and consumers' attitudes) and demographic characteristics (gender, age in three categories, level of education, ~~and~~ self-reported general health and whether they work(ed) or never worked in healthcare) and the use of OTC medications. Finally, we conducted a regression analysis to investigate the association between the dependent variable, consumers' attitudes, and the independent variables, consumers' confidence in their own OTC skills, demographic characteristics and use of OTC medications ( $p < 0.05$ ). We repeated this association using the total number of times respondents scored the options 'pharmacy only' and 'prescription only' (ranging from 0 to 6), instead of their mean scores, as a dependent variable. In the regression analyses, categorical variables were recoded into dummy variables. All statistical analyses were done using STATA, version 12.1.

## RESULTS

In total, 972 panel members returned the questionnaire (response rate 68%). The response to the online questionnaire was lower than to the written questionnaire (62% respectively 76%). More than half (56%) of the respondents were female (Table 1). The age category 40 to 64 years included 54% of the respondents. Almost half (47%) had a middle level of education. General health was self-reported as excellent/very good in 31% of the cases. 72% of the respondents had never worked in healthcare. Compared to the Dutch population aged 18 years and older<sup>18</sup>, it was mainly young people (18 to 39 years) who were underrepresented in the group of respondents (see Table 1).

### The use of OTC drugs

Among the respondents, 83% used OTC medications in the year prior to the questionnaire (see Table 1). ~~OTC analgesics were predominantly used.~~ Almost all (97%) respondents that had used OTC-drugs in the year prior to the questionnaire, indicated that they had used analgesics/pain and antipyretic medicines (97%). Furthermore, 76% of the respondents that had used OTC-drugs in the year prior to the questionnaire indicated that they had used, ~~followed by~~ medicines for coughs, colds, flu and a sore throat (~~76%~~).

### Confidence

1 The mean score for consumers' confidence in their own OTC skills was 3.74 (95% CI: 3.69 to 3.79, on a 5-point  
2 Likert scale), indicating that respondents ~~feel~~felt quite confident about their own OTC skills. ~~Clearly, R the~~  
3 ~~respondents felt clearly~~ less confident about the OTC skills of others (mean score 2.92 and 95% CI: 2.88 to 2.96).  
4  
5 As reflected in Figure 1, seven out of the ten respondents agreed, or strongly agreed, that they are able to make an  
6 appropriate choice between different types and brands of OTC drugs. Only 16% of them thought that others are  
7 able to make an appropriate choice. Furthermore, 65% of the respondents agreed, or strongly agreed, that they  
8 know exactly how to use OTC drugs in a safe way, while only 11% of them thought that others know how to  
9 apply-use OTC drugs safely. Lastly, 76% of the respondents agreed, or strongly agreed, that they can easily get  
10 the right information when trying to get advice on OTC drugs, compared to 30% of them who believed that others  
11 are able to get the right information.

12 ANOVAs and t-tests showed significant but modest differences between consumers' confidence in their own OTC  
13 skills and gender, age, ~~and~~ level of education and whether they work(ed) or never worked in healthcare. Women  
14 ~~feel~~felt slightly more confident about their own OTC skills than men. Furthermore, the elderly ( $\geq 65$  years) and  
15 people with a low level of education ~~have had~~ slightly less confidence than younger people and people with a  
16 middle and high level of education. People that currently work in healthcare or have worked in healthcare in the  
17 past felt slightly more confident about their own OTC skills than people that never worked in healthcare. In  
18 addition, ANOVA showed that people who had used OTC medications in the year prior to the questionnaire were  
19 more confident about their own OTC skills than those who had not used OTC medications in the year prior to the  
20 questionnaire (mean 3.84 respectively 3.24,  $p < 0.001$ ).

#### 21 Attitudes towards availability

22 Table 2 shows that the pharmacy is often mentioned as preferred channel where analgesics-painkillers with the  
23 described profiles should be available (range 41% to 71%). For five out of the six profiles most respondents  
24 preferred that analgesics-painkillers with such a profile should be available exclusively in pharmacies.

25 ~~Supermarkets or petrol stations were hardly mentioned as a preferred channel where analgesics with the described~~  
26 ~~profiles should be available. Only 1% to 8% chose supermarkets or petrol stations as preferred option.~~ ANOVAs  
27 and t-tests showed significant but modest differences between consumers' attitudes and age and level of  
28 education. Elderly ( $\geq 65$  years) ~~are~~were more restrictive in their preferences for availability than younger people.  
29 Moreover, people with a low level of education ~~are~~were more restrictive in their preferences than people with a  
30 middle and high level of education.

1 The last research question focused on the association between consumers' confidence in their own OTC skills and  
2 their attitudes towards availability (see Table 3). The regression analysis showed that respondents who were more  
3 confident about their own OTC skills preferred OTC ~~analgesics-painkillers~~ to be more generally available. This  
4 association was observed in addition to the effects of age and the level of education already mentioned. The  
5 association between own OTC skills and attitudes towards availability was also found ~~same results were shown~~  
6 when we performed an additional regression analysis, in which we used the total number of times respondents  
7 scored the options 'pharmacy only' and 'prescription only' as a dependent variable.  
8  
9  
10  
11  
12  
13  
14  
15

## 17 DISCUSSION

### 18 Principal findings

19 Our findings show that ~~c~~ Consumers feel confident about their own OTC skills, but ~~that~~ they have less confidence  
20 in the OTC skills of others. In other words, consumers presume that, compared to themselves, other people are  
21 less able to use self-medication appropriately. Although consumers are confident, they are conservative in their  
22 attitudes towards the general availability of OTC ~~analgesics-painkillers~~. Most consumers prefer that ~~analgesics~~  
23 ~~painkillers~~ with the described profiles (e.g. paracetamol and ibuprofen) should be available in pharmacies  
24 exclusively. Currently, ~~analgesics-painkillers~~ with profiles similar to those described are available for general sale  
25 in most European countries, including the Netherlands. Finally, we observed that more confident consumers  
26 preferred OTC ~~analgesics-painkillers~~ to be more generally available.  
27  
28  
29  
30  
31  
32  
33  
34  
35  
36  
37  
38  
39

### 40 Comparisons with other studies

41 There appears to be a discrepancy between our findings on the public perception about their own OTC skills and  
42 earlier research on ~~Earlier research examined~~ the public awareness, perception and knowledge of OTC  
43 medications. While our study showed that consumers have high confidence in their own skills, According to the  
44 literature previous studies found that, consumers perceive OTC drugs as safe<sup>14,15</sup> and "too weak to cause any real  
45 harm"<sup>6</sup>. Moreover, they are unaware of the fact that OTC medications can cause adverse events when used with  
46 other medications<sup>5,23</sup> and also of the toxicities of OTC medications<sup>4,14</sup>. Neither do they know, or are concerned,  
47 about the potential side effects of OTC analgesics<sup>13,14</sup>. They perceive OTC drugs as safe<sup>14,15</sup> and "too weak to  
48 cause any real harm"<sup>6</sup>. -In addition, a recent study in Australia observed that fewer people are using NSAIDs  
49 appropriately according to the label, since ibuprofen has become available outside the pharmacy<sup>16</sup>. Summarized,  
50 while previous studies show that consumers seem to be unaware of how to use OTC medications appropriately  
51  
52  
53  
54  
55  
56  
57  
58  
59  
60

1  
2  
3  
4  
5  
6  
7  
8  
9  
10  
11  
12  
13  
14  
15  
16  
17  
18  
19  
20  
21  
22  
23  
24  
25  
26  
27  
28  
29  
30  
31  
32  
33  
34  
35  
36  
37  
38  
39  
40  
41  
42  
43  
44  
45  
46  
47  
48  
49  
50  
51  
52  
53  
54  
55  
56  
57  
58  
59  
60

~~our study shows that~~ Our study investigated consumers' confidence in OTC skills, using two measurements. There appears to be a discrepancy between the literature and the public perception about their own OTC skills, since consumers are convinced they know how to use OTC medications appropriately. Yet, the confidence consumers have in the skills of others seems more consistent with the literature. It also probably better connects to reality, since, in general, the estimates of consumers regarding their peers' attitudes and behaviours tend to be roughly accurate<sup>17</sup>. Moreover, [the confidence consumers have in the skills of others](#) is in line with their attitudes towards availability of OTC [analgesics/painkillers](#). It appears that consumers have taken into account in their attitudes the confidence, or lack of it, that they have in the OTC skills of others. The assumption of the Dutch government that consumers prefer a less restrictive availability is not supported by our findings when [consumers are](#) confronted with safety information on medication. Nevertheless, in many countries an increasing number of drugs that were previously only available on prescription have been switched to OTC status<sup>2,8,9</sup>.

### Implications

~~As concluded by Hughes et al. (2001)<sup>24</sup>, confidence in and preference for~~ self-medication does not imply that the use of OTC medications is always optimal or appropriate.<sup>24</sup> ~~This is supported by the fact that the public's estimation of others will probably be more accurate. As a result,~~ [The difference between consumers' confidence in their own skills compared to those of others indicate that a proportion of some OTC users, are probably may be overconfident in their own behaviour of their own OTC skills. This view is supported by the fact that consumers would like to limit the availability of OTC drugs with profiles that match currently widely available OTC drugs. This suggests that not all consumers are able to comprehend the proper use of OTC drugs which, and this may entail health risks. For example, Leendertse et al. \(2008\)<sup>25</sup> observed that NSAIDs \(amongst which also OTC drugs\) are one of the medicines associated most often with potentially preventable medication-related hospital admissions. Moreover, Pirmohamed \(2004\)<sup>26</sup> observed that, among others, NSAIDs were most commonly implicated in admissions related to adverse drug reactions. Moreover/Furthermore, a Dutch study showed that during the last decade there had been an increase in requests on paracetamol poisoning to the National Poisons Information Center<sup>27</sup>. There also have been some concerns regarding switching the status of prescription drugs to OTC availability. Examples of such concerns are an inaccurate diagnosis by patients and delay in obtaining medical assistance<sup>28</sup>. In our study, we \[We were not able/unable\]\(#\) to link our results to the actual self-medication behaviour of the respondents, ~~since we do not know what they do and buy~~. Therefore, further research is recommended to examine this.](#)

1  
2  
3  
4  
5  
6  
7  
8  
9  
10  
11  
12  
13  
14  
15  
16  
17  
18  
19  
20  
21  
22  
23  
24  
25  
26  
27  
28  
29  
30  
31  
32  
33  
34  
35  
36  
37  
38  
39  
40  
41  
42  
43  
44  
45  
46  
47  
48  
49  
50  
51  
52  
53  
54  
55  
56  
57  
58  
59  
60

~~Previous research~~ [The fact that inappropriate use of medication entails health risks led to recommendations](#) to increase the risk awareness and knowledge among the public, and to educate them about OTC medications and ~~its~~ [potential risks](#) <sup>6:13;14:16;296;13;14;16;28</sup>. The question is whether people are either unable to understand and find the correct information, or whether they do not want, read, search or ask for this information. Therefore, it is not clear yet, how to ~~inform the public and increase awareness among them~~ [increase public awareness](#). What seems clear is that consumers consider pharmacies ~~es~~ [to be a reliable source of information as a safe environment](#), since most of them prefer the ~~analgesics-painkillers~~ [described to be available in pharmacies exclusively](#). [This is confirmed in an earlier study where was found that Dutch consumers consider pharmacists as the most reliable source of information regarding OTC medication](#) <sup>30</sup>. [Although Dutch consumers expect to be provided with reliable information from pharmacies, it is possible that there are differences between pharmacies with regards to the quality of their advice. Furthermore, in 2010, 88% of the Dutch adult population put much or very much trust in pharmacists](#) <sup>31</sup>. As a result, pharmacists ~~can~~ have an important role in questioning and informing patients about OTC medications.

### **The strengths and limitations of the study**

[This study addresses a relatively unexplored area](#). An important strength of our study is the large sample size and the response rate of almost 70%. However, the respondents in our study are not fully representative of the adult Dutch population aged 18 plus. Therefore, we performed analyses to see whether there are differences between groups of consumers. We observed some ~~small but~~ [significant differences](#). However, they do not appear to affect our conclusions ~~since the differences were modest~~. We included an indirect measurement of the concept 'attitudes towards availability' in our questionnaire instead of asking directly where certain specific OTC ~~analgesics~~ [painkillers](#) should be available. Earlier research in the Netherlands demonstrated that when trade names of ~~analgesics-painkillers~~ [are presented to consumers, they judge them as safe](#). More than 95%, respectively 70%, of the consumers considered paracetamol and ibuprofen as safe, or very safe <sup>32,29</sup>. ~~It is a disadvantage that~~ [Unfortunately, we did not include direct as well as indirect measurements in our questionnaire, as we are now not able to make a comparison between both measurements. We also did not provide information on the pack sizes/quantity in the questionnaire. Providing such information might influence the attitudes towards availability of the respondents. It could, for example, be assumed that consumers prefer a more restrictive availability for larger pack sizes of OTC medicines. Another possible limitation might be that the study only relates to painkillers, albeit those are the most used OTCs in the Netherlands. Furthermore, we did not include internet as a channel in](#)

1  
2  
3  
4  
5  
6  
7  
8  
9  
10  
11  
12  
13  
14  
15  
16  
17  
18  
19  
20  
21  
22  
23  
24  
25  
26  
27  
28  
29  
30  
31  
32  
33  
34  
35  
36  
37  
38  
39  
40  
41  
42  
43  
44  
45  
46  
47  
48  
49  
50  
51  
52  
53  
54  
55  
56  
57  
58  
59  
60

[our questionnaire, because this study was part of a policy evaluation in which only the official Dutch sales channels were evaluated. With the increasing growth of internet pharmacy, it would be interested to include this channel in further research.](#) Another possible limitation is that we excluded quite a considerable number of respondents (N=228), because they did not fill out all six safety profiles. The excluded respondents were more restrictive in their preferences, possibly implying a slight underestimation of the observed effects in our analyses.

### Conclusions

This study aimed to examine consumers' confidence in OTC skills and their attitudes towards the availability of OTC [analgesics/painkillers](#). The Dutch government assumed that consumers are well-informed, know how to use OTC medications appropriately, and prefer a wider availability. It could be questioned whether these assumptions are true. Consumers feel confident about their own OTC skills; however, they would prefer [analgesics/painkillers](#) with safety profiles resembling currently available OTC [analgesics/painkillers](#), to be available as OTC in pharmacies exclusively. Furthermore, the confidence consumers have in the OTC skills of others seems more consistent with their attitudes towards availability. Until consumers themselves realise they are also one of the others, they may overestimate their OTC skills, which may entail health risks.

**Footnotes**

We thank the panel members of the Dutch Health Care Consumer Panel who participated in this study.

Preliminary results of part of this manuscript were presented at the 4<sup>th</sup> European Public Health Conference:

‘Public Health and Welfare – Welfare Development and Public Health’ from 9 to 12 November 2011,

Copenhagen. An abstract is available in the European Journal of Public Health, 21 (2011) suppl. 1, p 129.

Contributors: The study was devised and designed by LVD and MB. JDJ was responsible for the data collection in the Dutch Health Care Consumer Panel. AB performed the statistical analyses and drafted the manuscript. All other authors critically revised it. All authors gave their final approval for the manuscript version to be published. All authors are responsible for the overall content as guarantors.

Funding: Data collection of this study was funded by the Dutch Ministry of Health, Welfare and Sport. The funder had no role in the design, execution, and writing of the study.

Competing interests: All authors have completed the Unified Competing Interest form at

[www.ijemje.org/coi\\_disclosure.pdf](http://www.ijemje.org/coi_disclosure.pdf) (available on request from the corresponding author) and declare: the authors

received support for the data collection from the Dutch Ministry of Health, Welfare and Sport for the work

submitted. AB, MB and JDJ there was no financial relationship with any organisations that might have an interest

in the submitted work in the previous three years. LVD received unrestricted grants from Bristol-Myers Squibb

and Astra Zeneca for studies not related to this study in 2011 and 2012. [MB performed occasional consultancy](#)

[work for both organisations of pharmacists, druggists and government.](#) And all authors that there was no other

relationships or activities that could appear to have influenced the submitted work.

Ethical approval: According to the Dutch law, no ethical approval was needed. The protection of the collected data is registered with the Dutch Data Protection Authority (nr. 1262949).

Data sharing: Data is available on request and subject to approval by the programme committee of the Dutch

Health Care Consumer Panel. [The questionnaire \(in Dutch\) is available on request from the authors.](#)

Exclusive licence: The Corresponding Author has the right to grant on behalf of all authors and does grant on behalf of all authors, an exclusive licence (or non exclusive for government employees) on a worldwide basis to the BMJ Publishing Group Ltd and its Licensees to permit this article (if accepted) to be published in BMJ editions and any other BMJ PGL products and sublicences to exploit all subsidiary rights, as set out in our licence.



## Reference List

- 1  
2  
3  
4 (1) Barber N. Drugs: from prescription only to pharmacy only. *BMJ* 1993; 307(6905):640.
- 5  
6 (2) Blenkinsopp A, Bradley C. Patients, society, and the increase in self medication. *BMJ* 1996;  
7  
8 312(7031):629-632.
- 9  
10 (3) Schoenemann JH, Muller-Oerlinghausen B, Munter KH, Enayati-Kashani S. Adverse drug  
11  
12 reactions (ADR) causing hospital admissions. *Pharmacoepidemiol Drug Saf* 1998; 7 Suppl 1:S1-  
13  
14 S3.
- 15  
16 (4) Huott MA, Storrow AB. A survey of adolescents' knowledge regarding toxicity of over-the-  
17  
18 counter medications. *Acad Emerg Med* 1997; 4(3):214-218.
- 19  
20 (5) Fendrick AM, Pan DE, Johnson GE. OTC analgesics and drug interactions: clinical implications.  
21  
22 *Osteopath Med Prim Care* 2008; 2:2.
- 23  
24 (6) Roumie CL, Griffin MR. Over-the-counter analgesics in older adults: a call for improved labelling  
25  
26 and consumer education. *Drugs Aging* 2004; 21(8):485-498.
- 27  
28 (7) Sheen CL, Dillon JF, Bateman DN, Simpson KJ, Macdonald TM. Paracetamol toxicity:  
29  
30 epidemiology, prevention and costs to the health-care system. *QJM* 2002; 95(9):609-619.
- 31  
32 (8) Hanna LA, Hughes CM. Public's views on making decisions about over-the-counter medication  
33  
34 and their attitudes towards evidence of effectiveness: a cross-sectional questionnaire study. *Patient*  
35  
36 *Educ Couns* 2011; 83(3):345-351.
- 37  
38 (9) Francis SA, Barnett N, Denham M. Switching of prescription drugs to over-the-counter status: is it  
39  
40 a good thing for the elderly? *Drugs Aging* 2005; 22(5):361-370.
- 41  
42 (10) US Government Accountability Office. Nonprescription drugs: Considerations regarding a behind-  
43  
44 the-counter drug class. Washington: 2009.
- 45  
46 (11) Van Dijk L, Van der Maat M, Salimans R, Bouvy M. De balans tussen verkrijgbaarheid en  
47  
48 veiligheid. Evaluatie van de indeling van zelfzorggeneesmiddelen en de rol van drogist en  
49  
50 apotheek bij de verstrekking. Utrecht: NIVEL; 2010.
- 51  
52 (12) Van Dijk L, Vervloet M, Plas M, Breuning E, Van den Ende E. Negatieve effecten van normaal en  
53  
54 verkeerd gebruik van geneesmiddelen. Een literatuurstudie. Utrecht: NIVEL; 2005.
- 55  
56 (13) Cham E, Hall L, Ernst AA, Weiss SJ. Awareness and use of over-the-counter pain medications: a  
57  
58 survey of emergency department patients. *South Med J* 2002; 95(5):529-535.
- 59  
60



- 1  
2  
3  
4  
5  
6  
7  
8  
9  
10  
11  
12  
13  
14  
15  
16  
17  
18  
19  
20  
21  
22  
23  
24  
25  
26  
27  
28  
29  
30  
31  
32  
33  
34  
35  
36  
37  
38  
39  
40  
41  
42  
43  
44  
45  
46  
47  
48  
49  
50  
51  
52  
53  
54  
55  
56  
57  
58  
59  
60
- (14) Wilcox CM, Cryer B, Triadafilopoulos G. Patterns of use and public perception of over-the-counter pain relievers: focus on nonsteroidal antiinflammatory drugs. *J Rheumatol* 2005; 32(11):2218-2224.
- (15) Clark D, Layton D, Shakir SA. Monitoring the safety of over the counter drugs. We need a better way than spontaneous reports. *BMJ* 2001; 323(7315):706-707.
- (16) Stosic R, Dunagan F, Palmer H, Fowler T, Adams I. Responsible self-medication: perceived risks and benefits of over-the-counter analgesic use. *Int J Pharm Pract* 2011; 19(4):236-245.
- (17) Balcetis E, Dunning D. Considering the situation: Why people are better social psychologists than self-psychologists. *Self and Identity* 2011.
- (18) Brabers AEM, Reitsma-van Rooijen M, De Jong JD. Consumentenpanel Gezondheidszorg. Basisrapport met informatie over het panel (2012). Utrecht: NIVEL; 2012.
- (19) Reitsma-van RM, de Jong JD, Rijken M. Regulated competition in health care: switching and barriers to switching in the Dutch health insurance system. *BMC Health Serv Res* 2011; 11:95.
- (20) de Jong JD, Brink-Muinen A, Groenewegen PP. The Dutch health insurance reform: switching between insurers, a comparison between the general population and the chronically ill and disabled. *BMC Health Serv Res* 2008; 8:58.
- (21) Singh G. Gastrointestinal complications of prescription and over-the-counter nonsteroidal anti-inflammatory drugs: a view from the ARAMIS database. Arthritis, Rheumatism, and Aging Medical Information System. *Am J Ther* 2000; 7(2):115-121.
- (22) Butt JH, Barthel JS, Moore RA. Clinical spectrum of the upper gastrointestinal effects of nonsteroidal anti-inflammatory drugs. Natural history, symptomatology, and significance. *Am J Med* 1988; 84(2A):5-14.
- (23) Indermitte J, Reber D, Beutler M, Bruppacher R, Hersberger KE. Prevalence and patient awareness of selected potential drug interactions with self-medication. *J Clin Pharm Ther* 2007; 32(2):149-159.
- (24) Hughes CM, McElnay JC, Fleming GF. Benefits and risks of self medication. *Drug Saf* 2001; 24(14):1027-1037.

- 1  
2  
3  
4  
5  
6  
7  
8  
9  
10  
11  
12  
13  
14  
15  
16  
17  
18  
19  
20  
21  
22  
23  
24  
25  
26  
27  
28  
29  
30  
31  
32  
33  
34  
35  
36
- (25) Leendertse AJ, Egberts AC, Stoker LJ, van den Bemt PM. Frequency of and risk factors for preventable medication-related hospital admissions in the Netherlands. *Arch Intern Med* 2008; 168(17):1890-1896.
- (26) Pirmohamed M, James S, Meakin S, Green C, Scott AK, Walley TJ et al. Adverse drug reactions as cause of admission to hospital: prospective analysis of 18 820 patients. *BMJ* 2004; 329(7456):15-19.
- (27) Van Dijk L, Van der Maat M, Bouvy M. Zelfzorggeneesmiddelen: actieve voorlichting over zelfzorg nodig. Aantal paracetamolvergiftigingen gestegen. *Pharmaceutisch Weekblad* 2010; 146(51-52):18-20.
- (28) Brass EP. Changing the status of drugs from prescription to over-the-counter availability. *N Engl J Med* 2001; 345(11):810-816.
- (29) Calamusa A, Di MA, Cristofani R, Arrighetti P, Santaniello V, Alfani S et al. Factors that influence Italian consumers' understanding of over-the-counter medicines and risk perception. *Patient Educ Couns* 2012; 87(3):395-401.
- (30) Brinkman A.C.A., Vervloet M, Van Dijk, Dute J.C.J., Kabel J.J.C., Friele R.D. Evaluatie reclamebesluit geneesmiddelen. 2008.
- (31) Brabers AEM, Reitsma-van Rooijen M, De Jong JD. Barometer Vertrouwen in de gezondheidszorg. 14-8-2013. [www.nivel.nl/consumentenpanel-gezondheidszorg](http://www.nivel.nl/consumentenpanel-gezondheidszorg).

37 Ref Type: Online Source

- 38  
39  
40  
41  
42  
43  
44  
45  
46  
47  
48  
49  
50  
51  
52  
53  
54  
55  
56  
57  
58  
59  
60
- (32) TNS/Nipo. Advisering bij zelfzorgeneesmiddelen in drogisterijen. Amsterdam: 2010.

## Tables and figures

Table 1: Demographic characteristics of the respondents [and the Dutch population aged 18 years and older](#)

|                                                              | <u>Respondents</u>  |                      | <u>Dutch population aged 18 years and older*</u> |                      |
|--------------------------------------------------------------|---------------------|----------------------|--------------------------------------------------|----------------------|
|                                                              | <u>N</u>            | <u>%</u>             | <u>%</u>                                         |                      |
| <b>Gender</b>                                                | <b>972</b>          |                      |                                                  |                      |
| Male                                                         | 424                 | 43.6                 | <a href="#">49.0</a>                             |                      |
| Female                                                       | 548                 | 56.4                 | <a href="#">51.0</a>                             |                      |
| <b>Age</b>                                                   | <b>972</b>          |                      |                                                  |                      |
| 18-39 years                                                  | 88                  | 9.1                  | <a href="#">35.3</a>                             |                      |
| 40-64 years                                                  | 527                 | 54.2                 | <a href="#">45.3</a>                             |                      |
| 65 years and older                                           | 357                 | 36.7                 | <a href="#">19.5</a>                             |                      |
| <b>Education</b>                                             | <b>948</b>          |                      |                                                  |                      |
| Low (none, primary school or pre-vocational education)       | 184                 | 19.4                 | <a href="#">33.8</a>                             |                      |
| Middle (secondary or vocational education)                   | 448                 | 47.3                 | <a href="#">40.5</a>                             |                      |
| High (professional higher education or university)           | 316                 | 33.3                 | <a href="#">25.7</a>                             |                      |
| <b>Self-reported general health</b>                          | <b>965</b>          |                      |                                                  |                      |
| Poor/bad                                                     | 175                 | 18.1                 | <a href="#">Less than good**</a>                 | <a href="#">18.6</a> |
| Good                                                         | 487                 | 50.5                 | <a href="#">Good</a>                             | <a href="#">52.7</a> |
| Excellent/very good                                          | 303                 | 31.4                 | <a href="#">Very good</a>                        | <a href="#">28.8</a> |
| <b><u>Working in healthcare</u></b>                          | <b><u>919</u></b>   |                      |                                                  |                      |
| <a href="#">No, never worked in healthcare</a>               | <a href="#">663</a> | <a href="#">72.1</a> | <a href="#">Not available</a>                    |                      |
| <a href="#">Yes, I am currently working in healthcare</a>    | <a href="#">119</a> | <a href="#">13.0</a> | <a href="#">Not available</a>                    |                      |
| <a href="#">Yes, I have worked in healthcare in the past</a> | <a href="#">137</a> | <a href="#">14.9</a> | <a href="#">Not available</a>                    |                      |

| Use of OTC drugs in the year prior to the questionnaire | 960 |      |                               |
|---------------------------------------------------------|-----|------|-------------------------------|
| No                                                      | 160 | 16.7 | <a href="#">Not available</a> |
| Yes                                                     | 800 | 83.3 | <a href="#">Not available</a> |

*[\\* Data of the Dutch population aged 18 years and older is based on information from Statistics Netherland.](#)*

*[\\*\\* Statistics Netherlands has three categories of self-reported general health. The percentage of Statistics Netherlands relate to the overall health of the entire general population, including those under 18 years.](#)*

Table 2: Percentage of respondents that prefer a specific channel with regards to the availability of OTC ~~analgesics~~ painkillers

| Safety profiles*                                                                                                                               | N   | Percentage of respondents that prefer a channel |         |                  |                      | Mean score **<br>(95% CI)     |
|------------------------------------------------------------------------------------------------------------------------------------------------|-----|-------------------------------------------------|---------|------------------|----------------------|-------------------------------|
|                                                                                                                                                |     | Supermarket/<br>petrol station                  | Chemist | Pharmacy<br>only | Prescription<br>only |                               |
| Safe when used normally, but potentially serious side effects when used in combination with certain prescription drugs                         | 876 | 1.1                                             | 7.4     | 70.8             | 20.7                 | <b>3.11</b><br>(3.07 to 3.15) |
| Can be used safely by most people, but potentially serious side effects when used by elderly people and those with severe concomitant diseases | 875 | 1.0                                             | 12.6    | 65.3             | 21.1                 | <b>3.07</b><br>(3.02 to 3.11) |
| Can be used safely by most people, but potentially serious side effects when used by children                                                  | 859 | 2.2                                             | 18.6    | 59.6             | 19.6                 | <b>2.97</b><br>(2.92 to 3.01) |
| In rare cases (less than 1 per 1,000) people suffer serious side effects, like gastrointestinal bleedings                                      | 848 | 3.5                                             | 25.4    | 52.7             | 18.4                 | <b>2.86</b><br>(2.81 to 2.91) |
| No side effects when used as directed, but taking too many tablets can cause serious damage                                                    | 813 | 8.1                                             | 34.0    | 46.0             | 11.9                 | <b>2.62</b><br>(2.56 to 2.67) |
| Mild side effects, such as stomach and intestinal problems, but never serious side effects                                                     | 841 | 4.8                                             | 45.3    | 40.7             | 9.3                  | <b>2.54</b><br>(2.50 to 2.59) |

\* Safety profiles are ordered based on their mean score. In the questionnaire, they were ordered in another way.

\*\* Ranging from 1 to 4 (1 = wide availability; 4 = restrictive availability).

Table 3: Regression model for attitudes towards availability (N=703672)

|                                                                                                                              | Beta*           | P-value         |
|------------------------------------------------------------------------------------------------------------------------------|-----------------|-----------------|
| <b>Availability</b> (1= wide; 4 = restrictive)                                                                               |                 |                 |
| <b>Confidence</b> (1 = low; 5 = high)                                                                                        | -0.1154         | <b>0.003005</b> |
| <b>Gender</b> (0 = man; 1 = woman)                                                                                           | 0.016010        | 0.807688        |
| <b>Age</b>                                                                                                                   | 0.117102        | <b>0.012003</b> |
| <b>Level of education</b>                                                                                                    |                 |                 |
| -Low                                                                                                                         | reference level |                 |
| -Middle                                                                                                                      | -0.131118       | <b>0.02410</b>  |
| -High                                                                                                                        | -0.254242       | <b>0.000</b>    |
| <b>Self-reported general health</b>                                                                                          |                 |                 |
| -Bad/poor                                                                                                                    | reference level |                 |
| -Good                                                                                                                        | 0.024028        | 0.599688        |
| -Excellent/very good                                                                                                         | -0.020011       | 0.838705        |
| <b>Work in healthcare</b> (0 = never worked in healthcare; 1 = currently working in healthcare/worked in healthcare in past) | -0.038          | 0.358           |
| <b>Use of OTC drugs in year prior to questionnaire</b> (0 = no; 1 = yes)                                                     | -0.013010       | 0.813743        |
| <b>Constant</b>                                                                                                              | .               | <b>0.000</b>    |

Adjusted R-square: 0.07

\* Standardized coefficients

Figure 1: Consumers' confidence in their own OTC skills and in the OTC skills of others



**Choosing:** I am / others are able to make an appropriate choice between different types and brands of OTC drugs

**Using:** I / others know exactly how to use OTC drugs in a safe way

**Obtaining information on:** When I / others try to get advice on OTC drugs, I / others can easily get the right information

Review Only



**WHERE TO BUY OTC MEDICATIONS?  
A cross-sectional survey investigating consumers' confidence in over-the-counter (OTC) skills and their attitudes towards the availability of OTC painkillers.**

|                                 |                                                                                                                                                                                                                                                                                                                                                                                                                              |
|---------------------------------|------------------------------------------------------------------------------------------------------------------------------------------------------------------------------------------------------------------------------------------------------------------------------------------------------------------------------------------------------------------------------------------------------------------------------|
| Journal:                        | <i>BMJ Open</i>                                                                                                                                                                                                                                                                                                                                                                                                              |
| Manuscript ID:                  | bmjopen-2013-003455.R2                                                                                                                                                                                                                                                                                                                                                                                                       |
| Article Type:                   | Research                                                                                                                                                                                                                                                                                                                                                                                                                     |
| Date Submitted by the Author:   | 29-Aug-2013                                                                                                                                                                                                                                                                                                                                                                                                                  |
| Complete List of Authors:       | Brabers, Anne; NIVEL Netherlands institute for health services research, van Dijk, Liset; NIVEL Netherlands institute for health services research, Bouvy, Marcel; Utrecht Institute for Pharmaceutical Sciences, Utrecht University, Division of Pharmacoepidemiology and Clinical Pharmacology; SIR Institute for Pharmacy Practice and Policy, De Jong, Judith; NIVEL Netherlands institute for health services research, |
| <b>Primary Subject Heading</b>: | Health services research                                                                                                                                                                                                                                                                                                                                                                                                     |
| Secondary Subject Heading:      | Health policy                                                                                                                                                                                                                                                                                                                                                                                                                |
| Keywords:                       | Health & safety < HEALTH SERVICES ADMINISTRATION & MANAGEMENT, Health policy < HEALTH SERVICES ADMINISTRATION & MANAGEMENT, Organisation of health services < HEALTH SERVICES ADMINISTRATION & MANAGEMENT                                                                                                                                                                                                                    |
|                                 |                                                                                                                                                                                                                                                                                                                                                                                                                              |

SCHOLARONE™  
Manuscripts

only



**WHERE TO BUY OTC MEDICATIONS?**

**A cross-sectional survey investigating consumers' confidence in over-the-counter (OTC) skills and their attitudes towards the availability of OTC painkillers.**

Brabers AEM<sup>1§</sup>, Van Dijk L<sup>1</sup>, Bouvy ML<sup>23</sup>, De Jong JD<sup>1</sup>

<sup>1</sup> NIVEL, Netherlands Institute for Health Services Research, PO Box 1568, 3500 BN Utrecht, the Netherlands

<sup>2</sup> Division Pharmacoepidemiology & Clinical Pharmacology, Utrecht Institute for Pharmaceutical Sciences (UIPS), PO Box 80082, 3500 TB Utrecht, the Netherlands

<sup>3</sup> SIR Institute for Pharmacy Practice and Policy, Theda Mansholtstraat 5b, 2331 JE Leiden, the Netherlands

§ Corresponding author

Contact address corresponding author:

PO Box 1568, 3500 BN Utrecht, the Netherlands

Email addresses:

AB: [a.brabers@nivel.nl](mailto:a.brabers@nivel.nl)

LVD: [l.vandijk@nivel.nl](mailto:l.vandijk@nivel.nl)

MB: [m.l.bouvy@uu.nl](mailto:m.l.bouvy@uu.nl)

JDJ: [j.dejong@nivel.nl](mailto:j.dejong@nivel.nl)

Main work positions:

AB: Junior researcher NIVEL

LVD: Programme co-ordinator NIVEL

MB: Professor of Pharmaceutical Care, Division of Pharmacoepidemiology & Clinical Pharmacology, Utrecht Institute for Pharmaceutical Sciences (UIPS)

JDJ: Programme co-ordinator NIVEL

**ABSTRACT**

**Objective:** To examine consumers' confidence in their own, and also in other people's, over-the-counter (OTC) skills and to describe their attitudes towards the availability of OTC painkillers. Moreover we examined the association between confidence in OTC skills and attitudes.

**Design:** Cross-sectional survey. Mixed methods (postal and electronic) self-administered questionnaire.

**Participants:** Members of the Dutch Health Care Consumer Panel.

**Main outcome measures:** Consumers' confidence in their own, and in other people's, OTC skills was examined. Confidence was measured by three questions regarding obtaining information on, choosing, and using OTC medication. Consumers' attitudes towards availability were assessed using six safety profiles, by asking which channel consumers prefer for each profile.

**Results:** The response rate was 68% (N=972). Consumers feel confident about their own OTC skills (mean 3.74; 95% CI 3.69 to 3.79, on a 5-point Likert scale), but have less confidence in OTC skills of others (mean 2.92; 95% CI 2.88 to 2.96). Consumers are conservative in their attitudes towards the availability of OTC painkillers. Most consumers prefer painkillers to be available exclusively in pharmacies (41 to 71% per profile indicated pharmacy only). Moreover, there is an association between confidence in OTC skills and attitudes ( $p=0.005$ ;  $\beta=-0.114$ ). Consumers who are more confident about their own OTC skills prefer OTC painkillers to be more generally available.

**Conclusions:** Consumers feel confident about their own OTC skills. However, they would prefer painkillers with safety profiles resembling those currently available OTC, to be available as OTC in pharmacies exclusively. Consumers' confidence in the OTC skills of others is more consistent with their attitudes towards availability of OTC painkillers. Until consumers themselves realise they are also one of the others, they may overestimate their own OTC skills, which may entail health risks.

## Article summary

### Article focus

- Several studies have observed that consumers appear to be unaware of how to use OTC medications appropriately, which may entail health risks.
- Until now little is known about consumers' confidence in their own and other people's OTC skills and their attitudes towards the availability of OTC painkillers.
- This study aimed to examine consumers' confidence in both their own, and in other people's, OTC skills, to look too at their attitudes towards the availability of OTC painkillers, and to examine the association between confidence in OTC skills and attitudes.

### Key messages

- Consumers feel confident about their own OTC skills. However, they prefer that painkillers with safety profiles resembling those currently available OTC, to be available as OTC in pharmacies exclusively.
- Consumers have less confidence in the OTC skills of others. This perception is more consistent with their attitudes towards availability of OTC painkillers.
- Until consumers themselves realise they are also one of the others, they may overestimate their own OTC skills, which may entail health risks.

### Strengths and limitations of this study

- Strengths include the large sample size and the response rate of almost 70% and the inclusion of an indirect measurement of the concept 'attitudes towards availability' in our questionnaire instead of asking directly where certain specific OTC painkillers should be available. Another strength is that this study addresses a relatively unexplored area.
- Limitations include not being able to make a comparison between a direct as well as indirect measurements and not being able to link our results to the actual self-medication behaviour of the respondents. In addition, the study only relates to painkillers, the most used OTCs in the Netherlands.

## BACKGROUND

The need to save on health care spending and the trend to enhance self care have led to more emphasis on patients taking their own responsibility for the management of minor ailments, including the use of medication that is available without a prescription<sup>1,2</sup>. Today, a wide range of conditions can be treated using medications that are available OTC. Some examples of categories of medicines that have been reclassified to non-prescription medication in many countries are nonsteroidal anti-inflammatory drugs (NSAIDs), anti fungal creams and laxatives. However, inappropriate use of OTC medications entails considerable health risks. Several studies demonstrated that inappropriate use results in drug intoxication, drug interactions, side effects and increased health care costs as a consequence of extra visits to a doctor and hospitalization<sup>3-7</sup>. Nevertheless, in many countries, increasingly more drugs that were previously only available on prescription are being switched to OTC status<sup>2,8,9</sup>. The United States Government Accountability Office studied five countries (the UK, the USA, the Netherlands, Italy and Australia) and determined how medicines were classified in each. They found that since 1995 all these countries have increased OTC availability. This is due either to changes in the classification of non-prescription drugs or to the reclassification of medications into less restrictive classes<sup>10</sup>.

In the Netherlands, the availability of OTC drugs increased when the Dutch government changed the system for OTC medications. The Dutch healthcare policy is based on ideas that independent and critical consumers require an increased availability of OTC medication in order to select a particular drug themselves. Since the introduction of the Medicines Act on 1 July 2007, three categories of non-prescription drugs have been specified: 1) pharmacy only; 2) pharmacy or chemist only; and 3) general sales<sup>11</sup>. Before July 2007, the third category did not exist. In the Netherlands, there is a distinction between pharmacies and chemists. Pharmacies are run by a pharmacist and able to sell all prescription (when a prescription is given) and non-prescription drugs, while chemists are run by a druggist, who requires less training than a pharmacist and is able to sell many but not all non-prescription drugs<sup>10</sup>. When introducing the new legislation, the Dutch government argued that consumers are well-informed and know how to use OTC drugs appropriately<sup>11,12</sup>. This assumption was not supported by international literature. Earlier research, mainly focused on analgesics, observed that consumers appear to be unaware of how to use OTC medications appropriately<sup>4-6,13-16</sup>.

1  
2  
3  
4  
5  
6  
7  
8  
9  
10  
11  
12  
13  
14  
15  
16  
17  
18  
19  
20  
21  
22  
23  
24  
25  
26  
27  
28  
29  
30  
31  
32  
33  
34  
35  
36  
37  
38  
39  
40  
41  
42  
43  
44  
45  
46  
47  
48  
49  
50  
51  
52  
53  
54  
55  
56  
57  
58  
59  
60

There has been little research conducted into how consumers themselves perceive their skills in using OTC medications appropriately. It is important to gain some insight into areas such as overestimating OTC skills as this may result in risks to health. The purpose of the present study was to examine consumers' confidence in OTC skills. We examined consumers' confidence, both in their own OTC skills, and in those of others. This is because previous research has shown that "people tend to think positively of themselves, often to unrealistic degrees"<sup>17</sup>. Moreover, the literature demonstrated that consumers' estimates of their peers' attitudes and behaviours tend to be roughly accurate<sup>17</sup>. Furthermore, we examined which channels consumers prefer with regard to the availability of OTC painkillers. Finally, we examined the association between consumers' confidence in OTC skills and their attitudes towards the availability of OTC painkillers, as we expected that more confident consumers prefer them to be more generally available.

## METHODS

### Setting

Data were collected in the Dutch Health Care Consumer Panel<sup>18-20</sup>. This panel aims to measure opinions on and knowledge of health care as well as expectations and experiences with health care at a national level. At the time of the study (June 2010), the Consumer Panel consisted of approximately 3,000 people aged 18 years and older. Each individual member of the panel receives a questionnaire approximately three times a year and can quit the panel at any time. There is no possibility for consumers to sign up for the panel on their own initiative. The panel is renewed on regular base. Renewal is necessary to make sure that members do not develop specific knowledge of, and attention for, health care issues, and that no questionnaire-fatigue occurs. Moreover, renewal compensates for panel members who, for example, have died or moved without informing us about the new address. To recruit new panel members an address file is bought from an address supplier. As a result, possible new members are sampled at random from the general population in the Netherlands. Sampled people receive an information letter about the panel and are called within a week after receiving that letter. If they are interested, they receive a questionnaire on their demographic characteristics. When that questionnaire is returned, they are considered members of the panel. Data are anonymously processed, and the protection of the data collected is registered with the Dutch Data Protection Authority (nr. 1262949).

### Questionnaire

1 The questionnaire was developed based on the wider literature and experiences of the research team. In total, the  
2 questionnaire included 36 questions (with largely pre-defined answer categories of responses) focusing on  
3 different aspects of OTC medications. While a pilot study was not conducted due to time constraints, face and  
4 content validity of the questionnaire were assessed by two senior researchers (LVD and MB). In June 2010, the  
5 self-administered questionnaire was sent to 1,422 panel members. According to their previously stated preference,  
6 671 members received a questionnaire by post and 751 through the internet. Using a mixed methods approach  
7 helped to ensure that certain groups were not excluded from the study and may also have increased the response  
8 rate. Other methods used to increase the response rate included sending two electronic reminders and one postal  
9 reminder to panel members who had not responded yet. The closing date of the questionnaire was late July 2010.  
10  
11  
12  
13  
14  
15  
16  
17  
18  
19

### 20 Demographic characteristics

21 The demographic characteristics of the panel members including their age, gender, level of education, self-  
22 reported general health and whether they work(ed) or never worked in healthcare are documented at the start of  
23 the panel membership and are updated annually. Level of education reflected the highest level of education  
24 completed and was classified as low; middle; and high (see also Table 1). To measure self-reported general health  
25 one question from the SF-36 was used. In the SF-36 the answer categories (bad; fair; good; very good; excellent)  
26 are not defined, therefore we did not provide any explanation of these terms either.  
27  
28  
29  
30  
31  
32  
33  
34  
35  
36

### 37 The use of OTC drugs

38 The respondents were asked how long it has been since they had used OTC medications. We defined OTC  
39 medications in the questionnaire as follows: “OTC medications are medicines that you can buy at pharmacies and  
40 chemists without a doctors’ prescription. In addition, you can buy some of these medicines at supermarkets and  
41 petrol stations. Examples of OTC medications are painkillers, such as paracetamol or ibuprofen. Homeopathic  
42 medicines, nutritional supplements and contraceptives are not considered to be OTC medications”. Based on their  
43 answers, we generated a dichotomous variable for the use of OTC drugs in the year prior to the questionnaire  
44 (1=yes; 0=no). In addition, the respondents who had used OTC drugs in the year prior to the questionnaire were  
45 asked what kind of categories (pre-defined) of OTC drugs they had used in that year. All questions had pre-  
46 defined categories of answers.  
47  
48  
49  
50  
51  
52  
53  
54  
55  
56  
57

### 58 Confidence

1 Confidence was measured using three questions with regard to obtaining information on, choosing and using OTC  
2 medications. These were: 1) 'I am able to make an appropriate choice between different types and brands of OTC  
3 drugs'; 2) 'I know exactly how to use OTC drugs in a safe way'; and 3) 'When I try to get advice on OTC drugs, I  
4 can easily get the right information'. We used the same three items to examine consumers' confidence in the OTC  
5 skills of others, for example asking if: 'Others are able to make an appropriate choice between different types and  
6 brands of OTC drugs'. All items had a five-point Likert scale ranging from strongly disagrees to strongly agree.  
7 We evaluated for both scales whether the three items measured a single concept by calculating the internal  
8 consistency given by Cronbach's alpha. Only the respondents who filled out all three items were included (own:  
9 N=951; others: N=949). The internal consistency was good (for both scales Cronbach's alpha 0.81).  
10 Subsequently, a mean score was calculated for the respondents who filled out all three items ranging from 1 to 5,  
11 in which higher scores indicated greater confidence.  
12

#### 13 Attitudes towards availability

14 We presented six safety profiles of painkillers in order to assess consumers' attitudes towards availability. Each  
15 profile described a painkiller having properties that resemble current available painkillers in the Netherlands (e.g.  
16 paracetamol and ibuprofen). In the Netherlands, paracetamol 500 mg; several combinations of paracetamol 500  
17 mg with caffeine and/or vitamin C; several combinations of paracetamol 250 mg with propyphenazon 250 mg or  
18 acetylsalicylic acid 250 mg; ibuprofen 200 mg and 400 mg; naproxen 220 and 275 mg; diclofenac 12,5 mg;  
19 ketoprofen 25 mg; acetylsalicylic acid 500 mg; and carbasalate calcium 600 mg are all available OTC in oral  
20 formulations. In addition, diclofenac gel is registered OTC as topical preparation, however, only for pain due to  
21 arthrosis of finger and knees. The profiles were descriptions of possible adverse effects of their use,  
22 inappropriately or not, and were based on information reflected in patient information leaflets and summaries of  
23 product characteristics. They were constructed by one of the research members (MB), who is a pharmacist with  
24 special interest in OTC medication and author of a standard Dutch handbook of self-medication. We focused on  
25 OTC painkillers because painkillers are among the most commonly used medications<sup>14,16,21</sup>, and their  
26 inappropriate use can cause serious side effects<sup>5,6,13,21,22</sup>. The following six safety profiles were included: 1) 'No  
27 side effects when used as directed, but taking too many tablets can cause serious damage'; 2) 'Mild side effects,  
28 such as stomach and intestinal problems, but never serious side effects'; 3) 'In rare cases (less than 1 per 1,000)  
29 people suffer serious side effects, like gastrointestinal bleeding'; 4) 'Safe when used normally, but potentially  
30 serious side effects when used in combination with certain prescription drugs'; 5) 'Can be used safely by most  
31  
32  
33  
34  
35  
36  
37  
38  
39  
40  
41  
42  
43  
44  
45  
46  
47  
48  
49  
50  
51  
52  
53  
54  
55  
56  
57  
58  
59  
60

1 people, but potentially serious side effects when used by elderly people and those with severe concomitant  
2 diseases'; and 6) 'Can be used safely by most people, but potentially serious side effects when used by children'.  
3 We asked respondents to indicate their preferences for the availability of painkillers with the above described  
4 profiles, with the following options: general sales (defined in the questionnaire as supermarket / petrol station);  
5 chemist; pharmacy only; and prescription only. It should be noted that in the questionnaire the options were used  
6 in a different order, namely: pharmacy only; chemist; general sales; and prescription only. The answer options  
7 were based on the Dutch Medicines Act. The options were scored as 1 general sales; 2 chemist; 3 pharmacy only;  
8 and 4 prescription only. In addition, items scored as, 'I don't know', were recoded as missing (in total 115 times,  
9 16 to 25 per profile). To evaluate whether the six items measured a single concept, we calculated the internal  
10 consistency given by Cronbach's alpha. Respondents who did not fill out all profiles were excluded from the  
11 analyses (excluded N=228, included N=744). The excluded respondents did not differ significantly from the  
12 respondents included with regard to their demographics. However, they were significantly more restrictive in their  
13 preferences for the safety profiles for which they did provide an answer. Factor analysis of the data identified one  
14 factor and the internal consistency was good (Cronbach's alpha 0.77). Subsequently, a mean score was calculated  
15 for the items for the respondents who filled out all six profiles ranging from 1 to 4, whereby higher scores  
16 indicated a greater preference for restricting availability.  
17  
18  
19  
20  
21  
22  
23  
24  
25  
26  
27  
28  
29  
30  
31  
32  
33  
34

### 35 **Statistical analyses**

36 Firstly, we performed descriptive statistics. Then, by means of t-tests and one-way analyses of variance (ANOVA)  
37 ( $p < 0.01$ ), we tested the association between the outcomes (consumers' confidence in their own OTC skills and  
38 consumers' attitudes) and demographic characteristics (gender, age in three categories, level of education, self-  
39 reported general health and whether they work(ed) or never worked in healthcare) and the use of OTC  
40 medications. Finally, we conducted a regression analysis to investigate the association between the dependent  
41 variable, consumers' attitudes, and the independent variables, consumers' confidence in their own OTC skills,  
42 demographic characteristics and use of OTC medications ( $p < 0.05$ ). We repeated this association using the total  
43 number of times respondents scored the options 'pharmacy only' and 'prescription only' (ranging from 0 to 6),  
44 instead of their mean scores, as a dependent variable. In the regression analyses, categorical variables were  
45 recoded into dummy variables. All statistical analyses were done using STATA, version 12.1.  
46  
47  
48  
49  
50  
51  
52  
53  
54  
55  
56  
57

## 58 **RESULTS**



1 In total, 972 panel members returned the questionnaire (response rate 68%). The response to the online  
2 questionnaire was lower than to the written questionnaire (62% respectively 76%). More than half (56%) of the  
3 respondents were female (Table 1). The age category 40 to 64 years included 54% of the respondents. Almost half  
4 (47%) had a middle level of education. General health was self-reported as excellent/very good in 31% of the  
5 cases. 72% of the respondents had never worked in healthcare. Compared to the Dutch population aged 18 years  
6 and older<sup>18</sup>, it was mainly young people (18 to 39 years) who were underrepresented in the group of respondents  
7 (see Table 1).  
8  
9  
10  
11  
12  
13  
14

### 15 **The use of OTC drugs**

16 Among the respondents, 83% used OTC medications in the year prior to the questionnaire (see Table 1). Almost  
17 all respondents that had used OTC drugs in the year prior to the questionnaire, indicated that they had used pain  
18 and antipyretic medicines (97%). Furthermore, 76% of the respondents that had used OTC drugs in the year prior  
19 to the questionnaire indicated that they had used medicines for coughs, colds, flu and a sore throat.  
20  
21  
22  
23  
24  
25  
26  
27

### 28 **Confidence**

29 The mean score for consumers' confidence in their own OTC skills was 3.74 (95% CI: 3.69 to 3.79, on a 5-point  
30 Likert scale), indicating that respondents felt quite confident about their own OTC skills. Clearly, the respondents  
31 felt less confident about the OTC skills of others (mean score 2.92 and 95% CI: 2.88 to 2.96).  
32  
33  
34  
35

36 As reflected in Figure 1, seven out of the ten respondents agreed, or strongly agreed, that they are able to make an  
37 appropriate choice between different types and brands of OTC drugs. Only 16% of them thought that others are  
38 able to make an appropriate choice. Furthermore, 65% of the respondents agreed, or strongly agreed, that they  
39 know exactly how to use OTC drugs in a safe way, while only 11% of them thought that others know how to use  
40 OTC drugs safely. Lastly, 76% of the respondents agreed, or strongly agreed, that they can easily get the right  
41 information when trying to get advice on OTC drugs, compared to 30% of them who believed that others are able  
42 to get the right information.  
43  
44  
45  
46  
47  
48  
49

50 ANOVAs and t-tests showed significant but modest differences between consumers' confidence in their own OTC  
51 skills and gender, age, level of education and whether they work(ed) or never worked in healthcare. Women felt  
52 slightly more confident about their own OTC skills than men. Furthermore, the elderly ( $\geq 65$  years) and people  
53 with a low level of education had slightly less confidence than younger people and people with a middle and high  
54 level of education. People that currently work in healthcare or have worked in healthcare in the past felt slightly  
55  
56  
57  
58  
59  
60

1 more confident about their own OTC skills than people that never worked in healthcare. In addition, ANOVA  
2 showed that people who had used OTC medications in the year prior to the questionnaire were more confident  
3 about their own OTC skills than those who had not used OTC medications in the year prior to the questionnaire  
4 (mean 3.84 respectively 3.24,  $p < 0.001$ ).  
5  
6  
7  
8

### 9 10 11 **Attitudes towards availability**

12 Table 2 shows that the pharmacy is often mentioned as preferred channel where painkillers with the described  
13 profiles should be available (range 41% to 71%). For five out of the six profiles most respondents preferred that  
14 painkillers with such a profile should be available exclusively in pharmacies. Only 1% to 8% chose supermarkets  
15 or petrol stations as their preferred option. ANOVAs and t-tests showed significant but modest differences  
16 between consumers' attitudes and age and level of education. Elderly ( $\geq 65$  years) were more restrictive in their  
17 preferences for availability than younger people. Moreover, people with a low level of education were more  
18 restrictive in their preferences than people with a middle and high level of education.  
19

20 The last research question focused on the association between consumers' confidence in their own OTC skills and  
21 their attitudes towards availability (see Table 3). The regression analysis showed that respondents who were more  
22 confident about their own OTC skills preferred OTC painkillers to be more generally available. This association  
23 was observed in addition to the effects of age and the level of education already mentioned. The association  
24 between own OTC skills and attitudes towards availability was also found when we performed an additional  
25 regression analysis, in which we used the total number of times respondents scored the options 'pharmacy only'  
26 and 'prescription only' as a dependent variable.  
27  
28  
29  
30  
31  
32  
33  
34  
35  
36  
37  
38  
39  
40  
41

## 42 **DISCUSSION**

### 43 **Principal findings**

44 Consumers feel confident about their own OTC skills, but they have less confidence in the OTC skills of others.  
45 In other words, consumers presume that, compared to themselves, other people are less able to use self-medication  
46 appropriately. Although consumers are confident, they are conservative in their attitudes towards the general  
47 availability of OTC painkillers. Most consumers prefer that painkillers with the described profiles (e.g.  
48 paracetamol and ibuprofen) should be available in pharmacies exclusively. Currently, painkillers with profiles  
49 similar to those described are available for general sale in most European countries, including the Netherlands.  
50 Finally, we observed that more confident consumers preferred OTC painkillers to be more generally available.  
51  
52  
53  
54  
55  
56  
57  
58  
59  
60

### Comparisons with other studies

There appears to be a discrepancy between our findings on the public perception about their own OTC skills and earlier research on the public awareness, perception and knowledge of OTC medication. While our study showed that consumers have high confidence in their own skills, previous studies found that, consumers are unaware of the fact that OTC medications can cause adverse events when used with other medications<sup>5,23</sup> and also of the toxicities of OTC medications<sup>4,14</sup>. Neither do they know, or are concerned, about the potential side effects of OTC analgesics<sup>13,14</sup>. They perceive OTC drugs as safe<sup>14,15</sup> and “too weak to cause any real harm”<sup>6</sup>. In addition, a recent study in Australia observed that fewer people are using NSAIDs appropriately according to the label, since ibuprofen has become available outside the pharmacy<sup>16</sup>. Summarized, while previous studies show that consumers seem to be unaware of how to use OTC medications appropriately our study shows that consumers are convinced they know how to use OTC medications appropriately. Yet, the confidence consumers have in the skills of others seems more consistent with the literature. It also probably better connects to reality, since, in general, the estimates of consumers regarding their peers’ attitudes and behaviours tend to be roughly accurate<sup>17</sup>. Moreover, the confidence consumers have in the skills of others is in line with their attitudes towards availability of OTC painkillers. It appears that consumers have taken into account in their attitudes the confidence, or lack of it, that they have in the OTC skills of others. The assumption of the Dutch government that consumers prefer a less restrictive availability is not supported by our findings when consumers are confronted with safety information on medication. Nevertheless, in many countries an increasing number of drugs that were previously only available on prescription have been switched to OTC status<sup>2,8,9</sup>.

### Implications

Confidence in self-medication does not imply that the use of OTC medications is always optimal or appropriate<sup>24</sup>. The difference between consumers’ confidence in their own skills compared to those of others indicate that some OTC users may be overconfident of their own OTC skills. This view is supported by the fact that consumers would like to limit the availability of OTC drugs with profiles that match currently widely available OTC drugs. This suggests that not all consumers are able to comprehend the proper use of OTC drugs which may entail health risks. For example, Leendertse et al. (2008)<sup>25</sup> observed that NSAIDs (amongst which also OTC drugs) are one of the medicines associated most often with potentially preventable medication-related hospital admissions. Moreover, Pirmohamed (2004)<sup>26</sup> observed that, among others, NSAIDs were most commonly implicated in

1 admissions related to adverse drug reactions. Furthermore, a Dutch study showed that during the last decade there  
2 had been an increase in requests on paracetamol poisoning to the National Poisons Information Center <sup>27</sup>. There  
3 also have been some concerns regarding switching the status of prescription drugs to OTC availability. Examples  
4 of such concerns are an inaccurate diagnosis by patients and delay in obtaining medical assistance <sup>28</sup>. We were  
5 unable to link our results to the actual self-medication behaviour of the respondents. Therefore, further research is  
6 recommended to examine this.  
7  
8  
9  
10  
11  
12

13 The fact that inappropriate use of medication entails health risks led to recommendations to increase the risk  
14 awareness and knowledge among the public, and to educate them about OTC medication and its potential risks  
15 <sup>6;13;14;16;29</sup>. The question is whether people are either unable to understand and find the correct information, or  
16 whether they do not want, read, search or ask for this information. Therefore, it is not clear yet, how to increase  
17 public awareness. What seems clear is that consumers consider pharmacies as a safe environment, since most of  
18 them prefer the painkillers described to be available in pharmacies exclusively. This is similar to findings of an  
19 earlier study where was found that Dutch consumers consider pharmacists as the most reliable source of  
20 information regarding OTC medication <sup>30</sup>. Although Dutch consumers expect to be provided with reliable  
21 information from pharmacies, it is possible that there are differences between pharmacies with regards to the  
22 quality of their advice. Furthermore, in 2010, 88% of the Dutch adult population put much or very much trust in  
23 pharmacists <sup>31</sup>. As a result, pharmacists can have an important role in questioning and informing patients about  
24 OTC medications.  
25  
26  
27  
28  
29  
30  
31  
32  
33  
34  
35  
36  
37  
38

### 39 **The strengths and limitations of the study**

40 This study addresses a relatively unexplored area. An important strength of our study is the large sample size and  
41 the response rate of almost 70%. However, the respondents in our study are not fully representative of the adult  
42 Dutch population aged 18 plus. Therefore, we performed analyses to see whether there are differences between  
43 groups of consumers. We observed some small but significant differences. However, they do not appear to affect  
44 our conclusions. We included an indirect measurement of the concept 'attitudes towards availability' in our  
45 questionnaire instead of asking directly where certain specific OTC painkillers should be available. Earlier  
46 research in the Netherlands demonstrated that when trade names of painkillers are presented to consumers, they  
47 judge them as safe. More than 95%, respectively 70%, of the consumers considered paracetamol and ibuprofen as  
48 safe, or very safe <sup>32</sup>. Unfortunately, we did not include direct as well as indirect measurements in our  
49 questionnaire, as we are now not able to make a comparison between both measurements. We also did not provide  
50  
51  
52  
53  
54  
55  
56  
57  
58  
59  
60

1 information on the pack sizes/quantity in the questionnaire. Providing such information might influence the  
2 attitudes towards availability of the respondents. It could, for example, be assumed that consumers prefer a more  
3 restrictive availability for larger pack sizes of OTC medicines. Another possible limitation might be that the study  
4 only relates to painkillers, albeit those are the most used OTCs in the Netherlands. Furthermore, we did not  
5 include internet as a channel in our questionnaire, because this study was part of a policy evaluation in which only  
6 the official Dutch sales channels were evaluated. With the increasing growth of internet pharmacy, it would be  
7 interested to include this channel in further research. Another possible limitation is that we excluded quite a  
8 considerable number of respondents (N=228), because they did not fill out all six safety profiles. The excluded  
9 respondents were more restrictive in their preferences, possibly implying a slight underestimation of the observed  
10 effects in our analyses. Finally, a possible limitation is that we were not able to conduct a pilot study due to time  
11 constraints. By performing a pilot study some issues could have been identified and addressed from the onset to  
12 improve the questionnaire.

## 26 **Conclusions**

27 This study aimed to examine consumers' confidence in OTC skills and their attitudes towards the availability of  
28 OTC painkillers. The Dutch government assumed that consumers are well-informed, know how to use OTC  
29 medications appropriately, and prefer a wider availability. It could be questioned whether these assumptions are  
30 true. Consumers feel confident about their own OTC skills; however, they would prefer painkillers with safety  
31 profiles resembling currently available OTC painkillers, to be available as OTC in pharmacies exclusively.  
32 Furthermore, the confidence consumers have in the OTC skills of others seems more consistent with their  
33 attitudes towards availability. Until consumers themselves realise they are also one of the others, they may  
34 overestimate their OTC skills, which may entail health risks.

**Footnotes**

We thank the panel members of the Dutch Health Care Consumer Panel who participated in this study.

Preliminary results of part of this manuscript were presented at the 4<sup>th</sup> European Public Health Conference:

‘Public Health and Welfare – Welfare Development and Public Health’ from 9 to 12 November 2011,

Copenhagen. An abstract is available in the European Journal of Public Health, 21 (2011) suppl. 1, p 129.

Contributors: The study was devised and designed by LVD and MB. JDJ was responsible for the data collection in the Dutch Health Care Consumer Panel. AB performed the statistical analyses and drafted the manuscript. All other authors critically revised it. All authors gave their final approval for the manuscript version to be published. All authors are responsible for the overall content as guarantors.

Funding: Data collection of this study was funded by the Dutch Ministry of Health, Welfare and Sport. The funder had no role in the design, execution, and writing of the study.

Competing interests: All authors have completed the Unified Competing Interest form at [www.ijemje.org/coi\\_disclosure.pdf](http://www.ijemje.org/coi_disclosure.pdf) (available on request from the corresponding author) and declare: the authors received support for the data collection from the Dutch Ministry of Health, Welfare and Sport for the work submitted. AB and JDJ there was no financial relationship with any organisations that might have an interest in the submitted work in the previous three years. LVD received unrestricted grants from Bristol-Myers Squibb and Astra Zeneca for studies not related to this study in 2011 and 2012. MB performed occasional consultancy work for both organisations of pharmacists, druggists and government. And all authors that there was no other relationships or activities that could appear to have influenced the submitted work.

Ethical approval: According to the Dutch law, no ethical approval was needed. The protection of the collected data is registered with the Dutch Data Protection Authority (nr. 1262949).

Data sharing: Data is available on request and subject to approval by the programme committee of the Dutch Health Care Consumer Panel. The questionnaire (in Dutch) is available on request from the authors.

Exclusive licence: The Corresponding Author has the right to grant on behalf of all authors and does grant on behalf of all authors, an exclusive licence (or non exclusive for government employees) on a worldwide basis to the BMJ Publishing Group Ltd and its Licensees to permit this article (if accepted) to be published in BMJ editions and any other BMJ PGL products and sublicences to exploit all subsidiary rights, as set out in our licence.

## Reference List

- 1  
2  
3  
4 (1) Barber N. Drugs: from prescription only to pharmacy only. *BMJ* 1993; 307(6905):640.
- 5  
6 (2) Blenkinsopp A, Bradley C. Patients, society, and the increase in self medication. *BMJ* 1996;  
7  
8 312(7031):629-632.
- 9  
10 (3) Schoenemann JH, Muller-Oerlinghausen B, Munter KH, et al. Adverse drug reactions (ADR)  
11  
12 causing hospital admissions. *Pharmacoepidemiol Drug Saf* 1998; 7 Suppl 1:S1-S3.
- 13  
14 (4) Huott MA, Storrow AB. A survey of adolescents' knowledge regarding toxicity of over-the-  
15  
16 counter medications. *Acad Emerg Med* 1997; 4(3):214-218.
- 17  
18 (5) Fendrick AM, Pan DE, Johnson GE. OTC analgesics and drug interactions: clinical implications.  
19  
20 *Osteopath Med Prim Care* 2008; 2:2.
- 21  
22 (6) Roumie CL, Griffin MR. Over-the-counter analgesics in older adults: a call for improved labelling  
23  
24 and consumer education. *Drugs Aging* 2004; 21(8):485-498.
- 25  
26 (7) Sheen CL, Dillon JF, Bateman DN, et al. Paracetamol toxicity: epidemiology, prevention and costs  
27  
28 to the health-care system. *QJM* 2002; 95(9):609-619.
- 29  
30 (8) Hanna LA, Hughes CM. Public's views on making decisions about over-the-counter medication  
31  
32 and their attitudes towards evidence of effectiveness: a cross-sectional questionnaire study. *Patient*  
33  
34 *Educ Couns* 2011; 83(3):345-351.
- 35  
36 (9) Francis SA, Barnett N, Denham M. Switching of prescription drugs to over-the-counter status: is it  
37  
38 a good thing for the elderly? *Drugs Aging* 2005; 22(5):361-370.
- 39  
40 (10) US Government Accountability Office. Nonprescription drugs: Considerations regarding a behind-  
41  
42 the-counter drug class. Washington: 2009.
- 43  
44 (11) Van Dijk L, Van der Maat M, Salimans R, et al. Evaluatie van de indeling van  
45  
46 zelfzorggeneesmiddelen en de rol van drogist en apotheek bij de verstrekking. Utrecht: NIVEL;  
47  
48 2010.
- 49  
50 (12) Van Dijk L, Vervloet M, Plas M, et al. Negatieve effecten van normaal en verkeerd gebruik van  
51  
52 geneesmiddelen. Een literatuurstudie. Utrecht: NIVEL; 2005.
- 53  
54 (13) Cham E, Hall L, Ernst AA, et al. Awareness and use of over-the-counter pain medications: a  
55  
56 survey of emergency department patients. *South Med J* 2002; 95(5):529-535.
- 57  
58  
59  
60



- 1  
2  
3  
4  
5  
6  
7  
8  
9  
10  
11  
12  
13  
14  
15  
16  
17  
18  
19  
20  
21  
22  
23  
24  
25  
26  
27  
28  
29  
30  
31  
32  
33  
34  
35  
36  
37  
38  
39  
40  
41  
42  
43  
44  
45  
46  
47  
48  
49  
50  
51  
52  
53  
54  
55  
56  
57  
58  
59  
60
- (14) Wilcox CM, Cryer B, Triadafilopoulos G. Patterns of use and public perception of over-the-counter pain relievers: focus on nonsteroidal antiinflammatory drugs. *J Rheumatol* 2005; 32(11):2218-2224.
- (15) Clark D, Layton D, Shakir SA. Monitoring the safety of over the counter drugs. We need a better way than spontaneous reports. *BMJ* 2001; 323(7315):706-707.
- (16) Stosic R, Dunagan F, Palmer H, et al. Responsible self-medication: perceived risks and benefits of over-the-counter analgesic use. *Int J Pharm Pract* 2011; 19(4):236-245.
- (17) Balcetis E, Dunning D. Considering the situation: Why people are better social psychologists than self-psychologists. *Self and Identity* 2011.
- (18) Brabers AEM, Reitsma-van Rooijen M, De Jong JD. Consumentenpanel Gezondheidszorg. Basisrapport met informatie over het panel (2012). Utrecht: NIVEL; 2012.
- (19) Reitsma-van RM, de Jong JD, Rijken M. Regulated competition in health care: switching and barriers to switching in the Dutch health insurance system. *BMC Health Serv Res* 2011; 11:95.
- (20) de Jong JD, Brink-Muinen A, Groenewegen PP. The Dutch health insurance reform: switching between insurers, a comparison between the general population and the chronically ill and disabled. *BMC Health Serv Res* 2008; 8:58.
- (21) Singh G. Gastrointestinal complications of prescription and over-the-counter nonsteroidal anti-inflammatory drugs: a view from the ARAMIS database. Arthritis, Rheumatism, and Aging Medical Information System. *Am J Ther* 2000; 7(2):115-121.
- (22) Butt JH, Barthel JS, Moore RA. Clinical spectrum of the upper gastrointestinal effects of nonsteroidal anti-inflammatory drugs. Natural history, symptomatology, and significance. *Am J Med* 1988; 84(2A):5-14.
- (23) Indermitte J, Reber D, Beutler M, et al. Prevalence and patient awareness of selected potential drug interactions with self-medication. *J Clin Pharm Ther* 2007; 32(2):149-159.
- (24) Hughes CM, McElnay JC, Fleming GF. Benefits and risks of self medication. *Drug Saf* 2001; 24(14):1027-1037.
- (25) Leendertse AJ, Egberts AC, Stoker LJ, et al. Frequency of and risk factors for preventable medication-related hospital admissions in the Netherlands. *Arch Intern Med* 2008; 168(17):1890-1896.



- 1  
2  
3 (26) Pirmohamed M, James S, Meakin S, et al. Adverse drug reactions as cause of admission to  
4 hospital: prospective analysis of 18 820 patients. *BMJ* 2004; 329(7456):15-19.  
5  
6 (27) Van Dijk L, Van der Maat M, Bouvy M. Zelfzorggeneesmiddelen: actieve voorlichting over  
7 zelfzorg nodig. Aantal paracetamolvergiftigingen gestegen. *Pharmaceutisch Weekblad* 2010;  
8 146(51-52):18-20.  
9  
10 (28) Brass EP. Changing the status of drugs from prescription to over-the-counter availability. *N Engl J*  
11 *Med* 2001; 345(11):810-816.  
12  
13 (29) Calamusa A, Di MA, Cristofani R, et al. Factors that influence Italian consumers' understanding of  
14 over-the-counter medicines and risk perception. *Patient Educ Couns* 2012; 87(3):395-401.  
15  
16 (30) Brinkman A.C.A., Vervloet M, Van Dijk, et al. Evaluatie reclamebesluit geneesmiddelen. 2008.  
17  
18 (31) Brabers AEM, Reitsma-van Rooijen M, De Jong JD. Barometer Vertrouwen in de  
19 gezondheidszorg. 14-8-2013. [www.nivel.nl/consumentenpanel-gezondheidszorg](http://www.nivel.nl/consumentenpanel-gezondheidszorg).

20  
21  
22 Ref Type: Online Source

- 23  
24  
25 (32) TNS/Nipo. Advisering bij zelfzorgeneesmiddelen in drogisterijen. Amsterdam: 2010.  
26  
27  
28  
29  
30  
31  
32  
33  
34  
35  
36  
37  
38  
39  
40  
41  
42  
43  
44  
45  
46  
47  
48  
49  
50  
51  
52  
53  
54  
55  
56  
57  
58  
59  
60

1  
2  
3  
4  
5  
6  
7  
8  
9  
10  
11  
12  
13  
14  
15  
16  
17  
18  
19  
20  
21  
22  
23  
24  
25  
26  
27  
28  
29  
30  
31  
32  
33  
34  
35  
36  
37  
38  
39  
40  
41  
42  
43  
44  
45  
46  
47  
48  
49  
50  
51  
52  
53  
54  
55  
56  
57  
58  
59  
60

For peer review only

## Tables and figures

Table 1: Demographic characteristics of the respondents and the Dutch population aged 18 years and older

|                                                        | Respondents |      | Dutch population aged 18 years and older* |      |
|--------------------------------------------------------|-------------|------|-------------------------------------------|------|
|                                                        | N           | %    | %                                         |      |
| <b>Gender</b>                                          | <b>972</b>  |      |                                           |      |
| Male                                                   | 424         | 43.6 | 49.0                                      |      |
| Female                                                 | 548         | 56.4 | 51.0                                      |      |
| <b>Age</b>                                             | <b>972</b>  |      |                                           |      |
| 18-39 years                                            | 88          | 9.1  | 35.3                                      |      |
| 40-64 years                                            | 527         | 54.2 | 45.3                                      |      |
| 65 years and older                                     | 357         | 36.7 | 19.5                                      |      |
| <b>Education</b>                                       | <b>948</b>  |      |                                           |      |
| Low (none, primary school or pre-vocational education) | 184         | 19.4 | 33.8                                      |      |
| Middle (secondary or vocational education)             | 448         | 47.3 | 40.5                                      |      |
| High (professional higher education or university)     | 316         | 33.3 | 25.7                                      |      |
| <b>Self-reported general health</b>                    | <b>965</b>  |      |                                           |      |
| Poor/fair                                              | 175         | 18.1 | Less than good**                          | 18.6 |
| Good                                                   | 487         | 50.5 | Good                                      | 52.7 |
| Excellent/very good                                    | 303         | 31.4 | Very good                                 | 28.8 |
| <b>Working in healthcare</b>                           | <b>919</b>  |      |                                           |      |
| No, never worked in healthcare                         | 663         | 72.1 | Not available                             |      |
| Yes, I am currently working in healthcare              | 119         | 13.0 | Not available                             |      |
| Yes, I have worked in healthcare in the past           | 137         | 14.9 | Not available                             |      |

| Use of OTC drugs in the year prior to the questionnaire | 960 |      |               |
|---------------------------------------------------------|-----|------|---------------|
| No                                                      | 160 | 16.7 | Not available |
| Yes                                                     | 800 | 83.3 | Not available |

\* Data of the Dutch population aged 18 years and older is based on information from Statistics Netherland.

\*\* Statistics Netherlands has three categories of self-reported general health. The percentage of Statistics Netherlands relate to the overall health of the entire general population, including those under 18 years.

Table 2: Percentage of respondents that prefer a specific channel with regards to the availability of OTC painkillers

| Safety profiles*                                                                                                                               | N   | Percentage of respondents that prefer a channel |         |                  |                      | Mean score **<br>(95% CI)     |
|------------------------------------------------------------------------------------------------------------------------------------------------|-----|-------------------------------------------------|---------|------------------|----------------------|-------------------------------|
|                                                                                                                                                |     | Supermarket/<br>petrol station                  | Chemist | Pharmacy<br>only | Prescription<br>only |                               |
| Safe when used normally, but potentially serious side effects when used in combination with certain prescription drugs                         | 876 | 1.1                                             | 7.4     | 70.8             | 20.7                 | <b>3.11</b><br>(3.07 to 3.15) |
| Can be used safely by most people, but potentially serious side effects when used by elderly people and those with severe concomitant diseases | 875 | 1.0                                             | 12.6    | 65.3             | 21.1                 | <b>3.07</b><br>(3.02 to 3.11) |
| Can be used safely by most people, but potentially serious side effects when used by children                                                  | 859 | 2.2                                             | 18.6    | 59.6             | 19.6                 | <b>2.97</b><br>(2.92 to 3.01) |
| In rare cases (less than 1 per 1,000) people suffer serious side effects, like gastrointestinal bleedings                                      | 848 | 3.5                                             | 25.4    | 52.7             | 18.4                 | <b>2.86</b><br>(2.81 to 2.91) |
| No side effects when used as directed, but taking too many tablets can cause serious damage                                                    | 813 | 8.1                                             | 34.0    | 46.0             | 11.9                 | <b>2.62</b><br>(2.56 to 2.67) |
| Mild side effects, such as stomach and intestinal problems, but never serious side effects                                                     | 841 | 4.8                                             | 45.3    | 40.7             | 9.3                  | <b>2.54</b><br>(2.50 to 2.59) |

\* Safety profiles are ordered based on their mean score. In the questionnaire, they were ordered in another way.

\*\* Ranging from 1 to 4 (1 = wide availability; 4 = restrictive availability).

Table 3: Regression model for attitudes towards availability (N=672)

|                                                                                                                              | Beta*           | P-value      |
|------------------------------------------------------------------------------------------------------------------------------|-----------------|--------------|
| <b>Availability</b> (1= wide; 4 = restrictive)                                                                               |                 |              |
| <b>Confidence</b> (1 = low; 5 = high)                                                                                        | -0.114          | <b>0.005</b> |
| <b>Gender</b> (0 = man; 1 = woman)                                                                                           | 0.010           | 0.807        |
| <b>Age</b>                                                                                                                   | 0.102           | <b>0.012</b> |
| <b>Level of education</b>                                                                                                    |                 |              |
| -Low                                                                                                                         | reference level |              |
| -Middle                                                                                                                      | -0.118          | <b>0.024</b> |
| -High                                                                                                                        | -0.242          | <b>0.000</b> |
| <b>Self-reported general health</b>                                                                                          |                 |              |
| -Poor/fair                                                                                                                   | reference level |              |
| -Good                                                                                                                        | 0.028           | 0.599        |
| -Excellent/very good                                                                                                         | -0.011          | 0.838        |
| <b>Work in healthcare</b> (0 = never worked in healthcare; 1 = currently working in healthcare/worked in healthcare in past) | -0.038          | 0.358        |
| <b>Use of OTC drugs in year prior to questionnaire</b> (0 = no; 1 = yes)                                                     | -0.010          | 0.813        |
| <b>Constant</b>                                                                                                              | .               | <b>0.000</b> |

Adjusted R-square: 0.07

\* Standardized coefficients

1  
2  
3  
4  
5  
6  
7  
8  
9  
10  
11  
12  
13  
14  
15  
16  
17  
18  
19  
20  
21  
22  
23  
24  
25  
26  
27  
28  
29  
30  
31  
32  
33  
34  
35  
36  
37  
38  
39  
40  
41  
42  
43  
44  
45  
46  
47  
48  
49

Figure 1: Consumers' confidence in their own OTC skills and in the OTC skills of others

- Choosing:** I am / others are able to make an appropriate choice between different types and brands of OTC drugs
- Using:** I / others know exactly how to use OTC drugs in a safe way
- Obtaining information on:** When I / others try to get advice on OTC drugs, I / others can easily get the right information

For peer review only

1  
2  
3  
4  
5  
6  
7  
8  
9  
10  
11  
12  
13  
14  
15  
16  
17  
18  
19  
20  
21  
22  
23  
24  
25  
26  
27  
28  
29  
30  
31  
32  
33  
34  
35  
36  
37  
38  
39  
40  
41  
42  
43  
44  
45  
46  
47  
48  
49  
50  
51  
52  
53  
54  
55  
56  
57  
58  
59  
60

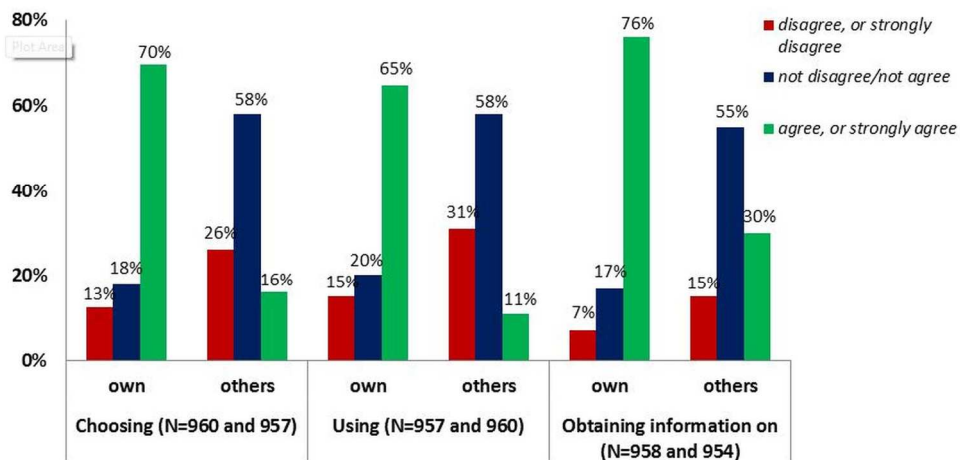

246x119mm (300 x 300 DPI)

er review only



STROBE 2007 (v4) Statement—Checklist of items that should be included in reports of *cross-sectional studies*

| Section/Topic             | Item # | Recommendation                                                                                                                                                                       | Reported on page #                                  |
|---------------------------|--------|--------------------------------------------------------------------------------------------------------------------------------------------------------------------------------------|-----------------------------------------------------|
| Title and abstract        | 1      | (a) Indicate the study’s design with a commonly used term in the title or the abstract                                                                                               | page 1                                              |
|                           |        | (b) Provide in the abstract an informative and balanced summary of what was done and what was found                                                                                  | page 2 & 3 (Article Summary)                        |
| <b>Introduction</b>       |        |                                                                                                                                                                                      |                                                     |
| Background/rationale      | 2      | Explain the scientific background and rationale for the investigation being reported                                                                                                 | page 4 & 5                                          |
| Objectives                | 3      | State specific objectives, including any prespecified hypotheses                                                                                                                     | page 4 & 5                                          |
| <b>Methods</b>            |        |                                                                                                                                                                                      |                                                     |
| Study design              | 4      | Present key elements of study design early in the paper                                                                                                                              | page 5 & 6                                          |
| Setting                   | 5      | Describe the setting, locations, and relevant dates, including periods of recruitment, exposure, follow-up, and data collection                                                      | page 5 & 6<br>(Data collection in June & July 2010) |
| Participants              | 6      | (a) Give the eligibility criteria, and the sources and methods of selection of participants                                                                                          | page 5 & 6                                          |
| Variables                 | 7      | Clearly define all outcomes, exposures, predictors, potential confounders, and effect modifiers. Give diagnostic criteria, if applicable                                             | page 6, 7 & 8                                       |
| Data sources/ measurement | 8*     | For each variable of interest, give sources of data and details of methods of assessment (measurement). Describe comparability of assessment methods if there is more than one group | page 6, 7 & 8                                       |
| Bias                      | 9      | Describe any efforts to address potential sources of bias                                                                                                                            | page 5                                              |
| Study size                | 10     | Explain how the study size was arrived at                                                                                                                                            | page 6                                              |
| Quantitative variables    | 11     | Explain how quantitative variables were handled in the analyses. If applicable, describe which groupings were chosen and why                                                         | page 8 & 9                                          |
| Statistical methods       | 12     | (a) Describe all statistical methods, including those used to control for confounding                                                                                                | page 8 & 9                                          |
|                           |        | (b) Describe any methods used to examine subgroups and interactions                                                                                                                  | page 8 & 9                                          |
|                           |        | (c) Explain how missing data were addressed                                                                                                                                          | page 6, 7 & 8                                       |
|                           |        | (d) If applicable, describe analytical methods taking account of sampling strategy                                                                                                   | NA                                                  |

|                          |     |                                                                                                                                                                                                              |                                                                                     |
|--------------------------|-----|--------------------------------------------------------------------------------------------------------------------------------------------------------------------------------------------------------------|-------------------------------------------------------------------------------------|
|                          |     | (e) Describe any sensitivity analyses                                                                                                                                                                        | page 9                                                                              |
| <b>Results</b>           |     |                                                                                                                                                                                                              |                                                                                     |
| Participants             | 13* | (a) Report numbers of individuals at each stage of study—eg numbers potentially eligible, examined for eligibility, confirmed eligible, included in the study, completing follow-up, and analysed            | page 6                                                                              |
|                          |     | (b) Give reasons for non-participation at each stage                                                                                                                                                         | NA                                                                                  |
|                          |     | (c) Consider use of a flow diagram                                                                                                                                                                           | NA                                                                                  |
| Descriptive data         | 14* | (a) Give characteristics of study participants (eg demographic, clinical, social) and information on exposures and potential confounders                                                                     | See table 1 (page 18 & 19) & page 9                                                 |
|                          |     | (b) Indicate number of participants with missing data for each variable of interest                                                                                                                          | See table 1 (page 18 & 19), table 2 (page 20), figure 1 (page 22) and page 6, 7 & 8 |
| Outcome data             | 15* | Report numbers of outcome events or summary measures                                                                                                                                                         | page 9 & 10                                                                         |
| Main results             | 16  | (a) Give unadjusted estimates and, if applicable, confounder-adjusted estimates and their precision (eg, 95% confidence interval). Make clear which confounders were adjusted for and why they were included | NA                                                                                  |
|                          |     | (b) Report category boundaries when continuous variables were categorized                                                                                                                                    | See table 1 (page 18 & 19)                                                          |
|                          |     | (c) If relevant, consider translating estimates of relative risk into absolute risk for a meaningful time period                                                                                             | NA                                                                                  |
| Other analyses           | 17  | Report other analyses done—eg analyses of subgroups and interactions, and sensitivity analyses                                                                                                               | page 9 & 10                                                                         |
| <b>Discussion</b>        |     |                                                                                                                                                                                                              |                                                                                     |
| Key results              | 18  | Summarise key results with reference to study objectives                                                                                                                                                     | page 11                                                                             |
| Limitations              | 19  | Discuss limitations of the study, taking into account sources of potential bias or imprecision. Discuss both direction and magnitude of any potential bias                                                   | page 11, 12 & 13                                                                    |
| Interpretation           | 20  | Give a cautious overall interpretation of results considering objectives, limitations, multiplicity of analyses, results from similar studies, and other relevant evidence                                   | page 11, 12 & 13                                                                    |
| Generalisability         | 21  | Discuss the generalisability (external validity) of the study results                                                                                                                                        | page 12 & 13                                                                        |
| <b>Other information</b> |     |                                                                                                                                                                                                              |                                                                                     |
| Funding                  | 22  | Give the source of funding and the role of the funders for the present study and, if applicable, for the original study on which the present article is based                                                | page 14                                                                             |

1  
2  
3  
4  
5  
6  
7  
8  
9  
10  
11  
12  
13  
14  
15  
16  
17  
18  
19  
20  
21  
22  
23  
24  
25  
26  
27  
28  
29  
30  
31  
32  
33  
34  
35  
36  
37  
38  
39  
40  
41  
42  
43  
44  
45  
46  
47  
48  
49

\*Give information separately for cases and controls in case-control studies and, if applicable, for exposed and unexposed groups in cohort and cross-sectional studies.

**Note:** An Explanation and Elaboration article discusses each checklist item and gives methodological background and published examples of transparent reporting. The STROBE checklist is best used in conjunction with this article (freely available on the Web sites of PLoS Medicine at <http://www.plosmedicine.org/>, Annals of Internal Medicine at <http://www.annals.org/>, and Epidemiology at <http://www.epidem.com/>). Information on the STROBE Initiative is available at [www.strobe-statement.org](http://www.strobe-statement.org).

For peer review only

## WHERE TO BUY OTC MEDICATIONS?

**A cross-sectional survey investigating consumers' confidence in over-the-counter (OTC) skills and their attitudes towards the availability of OTC painkillers.**

Brabers AEM<sup>1§</sup>, Van Dijk L<sup>1</sup>, Bouvy ML<sup>23</sup>, De Jong JD<sup>1</sup>

<sup>1</sup> NIVEL, Netherlands Institute for Health Services Research, PO Box 1568, 3500 BN Utrecht, the Netherlands

<sup>2</sup> Division Pharmacoepidemiology & Clinical Pharmacology, Utrecht Institute for Pharmaceutical Sciences (UIPS), PO Box 80082, 3500 TB Utrecht, the Netherlands

<sup>3</sup> SIR Institute for Pharmacy Practice and Policy, Theda Mansholtstraat 5b, 2331 JE Leiden, the Netherlands

§ Corresponding author

Contact address corresponding author:

PO Box 1568, 3500 BN Utrecht, the Netherlands

Email addresses:

AB: [a.brabers@nivel.nl](mailto:a.brabers@nivel.nl)

LVD: [l.vandijk@nivel.nl](mailto:l.vandijk@nivel.nl)

MB: [m.l.bouvy@uu.nl](mailto:m.l.bouvy@uu.nl)

JDJ: [j.dejong@nivel.nl](mailto:j.dejong@nivel.nl)

Main work positions:

AB: Junior researcher NIVEL

LVD: Programme co-ordinator NIVEL

MB: Professor of Pharmaceutical Care, Division of Pharmacoepidemiology & Clinical Pharmacology, Utrecht Institute for Pharmaceutical Sciences (UIPS)

JDJ: Programme co-ordinator NIVEL

**ABSTRACT**

**Objective:** To examine consumers' confidence in their own, and also in other people's, over-the-counter (OTC) skills and to describe their attitudes towards the availability of OTC painkillers. Moreover we examined the association between confidence in OTC skills and attitudes.

**Design:** Cross-sectional survey. Mixed methods (postal and electronic) self-administered questionnaire.

**Participants:** Members of the Dutch Health Care Consumer Panel.

**Main outcome measures:** Consumers' confidence in their own, and in other people's, OTC skills was examined. Confidence was measured by three questions regarding obtaining information on, choosing, and using OTC medication. Consumers' attitudes towards availability were assessed using six safety profiles, by asking which channel consumers prefer for each profile.

**Results:** The response rate was 68% (N=972). Consumers feel confident about their own OTC skills (mean 3.74; 95% CI 3.69 to 3.79, on a 5-point Likert scale), but have less confidence in OTC skills of others (mean 2.92; 95% CI 2.88 to 2.96). Consumers are conservative in their attitudes towards the availability of OTC painkillers. Most consumers prefer painkillers to be available exclusively in pharmacies (41 to 71% per profile indicated pharmacy only). Moreover, there is an association between confidence in OTC skills and attitudes ( $p=0.005$ ;  $\beta=-0.114$ ). Consumers who are more confident about their own OTC skills prefer OTC painkillers to be more generally available.

**Conclusions:** Consumers feel confident about their own OTC skills. However, they would prefer painkillers with safety profiles resembling those currently available OTC, to be available as OTC in pharmacies exclusively. Consumers' confidence in the OTC skills of others is more consistent with their attitudes towards availability of OTC painkillers. Until consumers themselves realise they are also one of the others, they may overestimate their own OTC skills, which may entail health risks.

## Article summary

### Article focus

- Several studies have observed that consumers appear to be unaware of how to use OTC medications appropriately, which may entail health risks.
- Until now little is known about consumers' confidence in their own and other people's OTC skills and their attitudes towards the availability of OTC painkillers.
- This study aimed to examine consumers' confidence in both their own, and in other people's, OTC skills, to look too at their attitudes towards the availability of OTC painkillers, and to examine the association between confidence in OTC skills and attitudes.

### Key messages

- Consumers feel confident about their own OTC skills. However, they prefer that painkillers with safety profiles resembling those currently available OTC, to be available as OTC in pharmacies exclusively.
- Consumers have less confidence in the OTC skills of others. This perception is more consistent with their attitudes towards availability of OTC painkillers.
- Until consumers themselves realise they are also one of the others, they may overestimate their own OTC skills, which may entail health risks.

### Strengths and limitations of this study

- Strengths include the large sample size and the response rate of almost 70% and the inclusion of an indirect measurement of the concept 'attitudes towards availability' in our questionnaire instead of asking directly where certain specific OTC painkillers should be available. Another strength is that this study addresses a relatively unexplored area.
- Limitations include not being able to make a comparison between a direct as well as indirect measurements and not being able to link our results to the actual self-medication behaviour of the respondents. In addition, the study only relates to painkillers, the most used OTCs in the Netherlands.

## BACKGROUND

The need to save on health care spending and the trend to enhance self care have led to more emphasis on patients taking their own responsibility for the management of minor ailments, including the use of medication that is available without a prescription<sup>1,2</sup>. Today, a wide range of conditions can be treated using medications that are available OTC. Some examples of categories of medicines that have been reclassified to non-prescription medication in many countries are [nonsteroidal anti-inflammatory drugs \(NSAIDs\)](#), anti fungal creams and laxatives. However, inappropriate use of OTC medications entails considerable health risks. Several studies demonstrated that inappropriate use results in drug intoxication, drug interactions, side effects and increased health care costs as a consequence of extra visits to a doctor and hospitalization<sup>3-7</sup>. Nevertheless, in many countries, increasingly more drugs that were previously only available on prescription are being switched to OTC status<sup>2,8,9</sup>. [The United States Government Accountability Office studied five countries A study of the US Government Accountability Office conducted in \(the UK, the USA, the Netherlands, Italy and Australia\) and determined how medicines were classified in each. They found, showed](#) that since 1995 all these countries have increased OTC availability. This is due either to changes in the classification of non-prescription drugs or to the reclassification of medications into less restrictive classes<sup>10</sup>.

In the Netherlands, the availability of OTC drugs increased when the Dutch government changed the system for OTC medications. The Dutch healthcare policy is based on ideas that independent and critical consumers require an increased availability of OTC medication in order to select a particular drug themselves. Since the introduction of the Medicines Act on 1 July 2007, three categories of non-prescription drugs have been specified: 1) pharmacy only; 2) pharmacy or chemist only; and 3) general sales<sup>11</sup>. Before July 2007, the third category did not exist. In the Netherlands, there is a distinction between pharmacies and chemists. Pharmacies are run by a pharmacist and able to sell all prescription ([when a prescription is given](#)) and non-prescription drugs, while chemists are run by a druggist, who requires less training than a pharmacist and is able to sell many but not all non-prescription drugs<sup>10</sup>. When introducing the new legislation, the Dutch government argued that consumers are well-informed and know how to use OTC drugs appropriately<sup>11,12</sup>. This assumption was not supported by international literature. Earlier research, mainly focused on analgesics, observed that consumers appear to be unaware of how to use OTC medications appropriately<sup>4-6,13-16</sup>.

1  
2  
3  
4  
5  
6  
7  
8  
9  
10  
11  
12  
13  
14  
15  
16  
17  
18  
19  
20  
21  
22  
23  
24  
25  
26  
27  
28  
29  
30  
31  
32  
33  
34  
35  
36  
37  
38  
39  
40  
41  
42  
43  
44  
45  
46  
47  
48  
49  
50  
51  
52  
53  
54  
55  
56  
57  
58  
59  
60

There has been little research conducted into how consumers themselves perceive their skills in using OTC medications appropriately. It is important to gain some insight into areas such as overestimating OTC skills as this may result in risks to health. The purpose of the present study was to examine consumers' confidence in OTC skills. We examined consumers' confidence, both in their own OTC skills, and in those of others. This is because previous research has shown that "people tend to think positively of themselves, often to unrealistic degrees"<sup>17</sup>. Moreover, the literature demonstrated that consumers' estimates of their peers' attitudes and behaviours tend to be roughly accurate<sup>17</sup>. Furthermore, we examined which channels consumers prefer with regard to the availability of OTC painkillers. Finally, we examined the association between consumers' confidence in OTC skills and their attitudes towards the availability of OTC painkillers, as we expected that more confident consumers prefer them to be more generally available.

## METHODS

### Setting

Data were collected in the Dutch Health Care Consumer Panel<sup>18-20</sup>. This panel aims to measure opinions on and knowledge of health care as well as expectations and experiences with health care at a national level. At the time of the study (June 2010), the Consumer Panel consisted of approximately 3,000 people aged 18 years and older.

Each individual member of the panel receives a questionnaire approximately three times a year and can quite the panel at any time. There is no possibility for consumers to sign up for the panel on their own initiative. The panel is renewed on regular base. Renewal is necessary to make sure that members do not develop specific knowledge of, and attention for, health care issues, and that no questionnaire-fatigue occurs. Moreover, renewal compensates for panel members who, for example, have died or moved without informing us about the new address. To recruit new panel members an address file is bought from an address supplier. As a result, possible new members are sampled at random from the general population in the Netherlands. Sampled people receive an information letter about the panel and are called within a week after receiving that letter. If they are interested, they receive a questionnaire on their demographic characteristics. When that questionnaire is returned, they are considered members of the panel. ~~The demographic characteristics of the panel members including their age, gender, level of education, self-reported general health and whether they work(ed) or never worked in healthcare are documented at the start of the panel membership and are updated annually.~~ Data are anonymously processed, and the protection of the data collected is registered with the Dutch Data Protection Authority (nr. 1262949).



## Questionnaire

The questionnaire was developed based on the wider literature and experiences of the research team. In total, the questionnaire included 36 questions (with largely pre-defined answer categories of responses) focusing on different aspects of OTC medications. While a pilot study was not conducted due to time constraints, face and content validity of the questionnaire were assessed by two senior researchers (LVD and MB). In June 2010, the self-administered questionnaire was sent to 1,422 panel members. According to their previously stated preference, 671 members received a questionnaire by post and 751 through the internet. Using a mixed methods approach helped to ensure that certain groups were not excluded from the study and may also have increased the response rate. Other methods used to increase the response rate included sending two electronic reminders and one postal reminder to panel members who had not responded yet. The closing date of the questionnaire was late July 2010. In June 2010, a self-administered questionnaire was sent to 1,422 panel members and returned by 972 members. According to their previously stated preference, 671 members received a questionnaire by post and 751 through the internet. In total, the questionnaire included 36 questions focusing on different aspects of OTC medications. To increase the response from the onset, two electronic reminders and one postal reminder were sent to panel members who had not responded yet.

## Demographic characteristics

The demographic characteristics of the panel members including their age, gender, level of education, self-reported general health and whether they work(ed) or never worked in healthcare are documented at the start of the panel membership and are updated annually. Level of education reflected the highest level of education completed and was classified as low; middle; and high (see also Table 1). To measure self-reported general health one question from the SF-36 was used. In the SF-36 the answer categories (bad; fair; good; very good; excellent) are not defined, therefore we did not provide any explanation of these terms either.

## The use of OTC drugs

The respondents were asked how long it has been since they had used OTC medications. We defined OTC medications ~~were defined~~ in the questionnaire as follows: “OTC medications are medicines that you can buy at pharmacies and chemists without a doctors’ prescription. In addition, you can buy some of these medicines at supermarkets and petrol stations. Examples of OTC medications are painkillers, such as paracetamol or ibuprofen. Homeopathic medicines, nutritional supplements and contraceptives are not considered to be OTC medications”.

1  
2  
3  
4  
5  
6  
7  
8  
9  
10  
11  
12  
13  
14  
15  
16  
17  
18  
19  
20  
21  
22  
23  
24  
25  
26  
27  
28  
29  
30  
31  
32  
33  
34  
35  
36  
37  
38  
39  
40  
41  
42  
43  
44  
45  
46  
47  
48  
49  
50  
51  
52  
53  
54  
55  
56  
57  
58  
59  
60

Based on their answers, we generated a dichotomous variable for the use of OTC drugs in the year prior to the questionnaire (1=yes; 0=no). In addition, the respondents who had used OTC drugs in the year prior to the questionnaire were asked what kind of categories (pre-defined) of OTC drugs they had used in that year. All questions had pre-defined categories of answers.

### Confidence

Confidence was measured using three questions with regard to obtaining information on, choosing and using OTC medications. These were: 1) 'I am able to make an appropriate choice between different types and brands of OTC drugs'; 2) 'I know exactly how to use OTC drugs in a safe way'; and 3) 'When I try to get advice on OTC drugs, I can easily get the right information'. We used the same three items to examine consumers' confidence in the OTC skills of others, for example asking if: 'Others are able to make an appropriate choice between different types and brands of OTC drugs'. All items had a five-point Likert scale ranging from strongly disagrees to strongly agree. We evaluated for both scales whether the three items measured a single concept by calculating the internal consistency given by Cronbach's alpha. Only the respondents who filled out all three items were included (own: N=951; others: N=949). The internal consistency was good (for both scales Cronbach's alpha 0.81). Subsequently, a mean score was calculated for the respondents who filled out all three items ranging from 1 to 5, in which higher scores indicated greater confidence.

### Attitudes towards availability

We presented six safety profiles of painkillers in order to assess consumers' attitudes towards availability. Each profile described a painkiller having properties that resemble current available painkillers in the Netherlands (e.g. paracetamol and ibuprofen). [In the Netherlands, paracetamol 500 mg; several combinations of paracetamol 500 mg with caffeine and/or vitamin C; several combinations of paracetamol 250 mg with propyhenazon 250 mg or acetylsalicylic acid 250 mg; ibuprofen 200 mg and 400 mg; naproxen 220 and 275 mg; diclofenac 12.5 mg; ketoprofen 25 mg; acetylsalicylic acid 500 mg; and carbasalate calcium 600 mg are all available OTC in oral formulations. In addition, diclofenac gel is registered OTC as topical preparation, however, only for pain due to arthrosis of finger and knees.](#) The profiles were descriptions of possible adverse effects of their use, inappropriately or not, and were based on information reflected in patient information leaflets and summaries of product characteristics. They were constructed by one of the research members (MB), who is a pharmacist with special interest in OTC medication and author of a standard Dutch handbook of self-medication. We focused on

1 OTC painkillers because painkillers are among the most commonly used medications<sup>14;16;21</sup>, and their  
2  
3 inappropriate use can cause serious side effects<sup>5;6;13;21;22</sup>. The following six safety profiles were included: 1) 'No  
4  
5 side effects when used as directed, but taking too many tablets can cause serious damage'; 2) 'Mild side effects,  
6  
7 such as stomach and intestinal problems, but never serious side effects'; 3) 'In rare cases (less than 1 per 1,000)  
8  
9 people suffer serious side effects, like gastrointestinal bleeding'; 4) 'Safe when used normally, but potentially  
10  
11 serious side effects when used in combination with certain prescription drugs'; 5) 'Can be used safely by most  
12  
13 people, but potentially serious side effects when used by elderly people and those with severe concomitant  
14  
15 diseases'; and 6) 'Can be used safely by most people, but potentially serious side effects when used by children'.  
16  
17 We asked respondents to indicate their preferences for the availability of painkillers with the above described  
18  
19 profiles, with the following options: general sales (defined in the questionnaire as supermarket / petrol station);  
20  
21 chemist; pharmacy only; and -prescription only. It should be noted that in the questionnaire the options were used  
22  
23 in a different order, namely: -pharmacy only; -chemist; -general sales; and -prescription only. The answer options  
24  
25 were based on the Dutch Medicines Act. The options were scored as 1 general sales; 2 chemist; 3 pharmacy only;  
26  
27 and 4 prescription only. In addition, items scored as, 'I don't know', were recoded as missing (in total 115 times,  
28  
29 16 to 25 per profile). To evaluate whether the six items measured a single concept, we calculated the internal  
30  
31 consistency given by Cronbach's alpha. Respondents who did not fill out all profiles were excluded from the  
32  
33 analyses (excluded N=228, included N=744). The excluded respondents did not differ significantly from the  
34  
35 respondents included with regard to their demographics. However, they were significantly more restrictive in their  
36  
37 preferences for the safety profiles for which they did provide an answer. Factor analysis of the data identified one  
38  
39 factor and the internal consistency was good (Cronbach's alpha 0.77). Subsequently, a mean score was calculated  
40  
41 for the items for the respondents who filled out all six profiles ranging from 1 to 4, whereby higher scores  
42  
43 indicated a greater preference for restricting availability.  
44  
45

### 46 **Statistical analyses**

47  
48 Firstly, we performed descriptive statistics. Then, by means of t-tests and one-way analyses of variance (ANOVA)  
49  
50 ( $p < 0.01$ ), we tested the association between the outcomes (consumers' confidence in their own OTC skills and  
51  
52 consumers' attitudes) and demographic characteristics (gender, age in three categories, level of education, self-  
53  
54 reported general health and whether they work(ed) or never worked in healthcare) and the use of OTC  
55  
56 medications. Finally, we conducted a regression analysis to investigate the association between the dependent  
57  
58 variable, consumers' attitudes, and the independent variables, consumers' confidence in their own OTC skills,  
59  
60

1 demographic characteristics and use of OTC medications ( $p < 0.05$ ). We repeated this association using the total  
2 number of times respondents scored the options 'pharmacy only' and 'prescription only' (ranging from 0 to 6),  
3 instead of their mean scores, as a dependent variable. In the regression analyses, categorical variables were  
4 recoded into dummy variables. All statistical analyses were done using STATA, version 12.1.  
5  
6  
7  
8  
9

## 10 RESULTS

11 In total, 972 panel members returned the questionnaire (response rate 68%). The response to the online  
12 questionnaire was lower than to the written questionnaire (62% respectively 76%). More than half (56%) of the  
13 respondents were female (Table 1). The age category 40 to 64 years included 54% of the respondents. Almost half  
14 (47%) had a middle level of education. General health was self-reported as excellent/very good in 31% of the  
15 cases. 72% of the respondents had never worked in healthcare. Compared to the Dutch population aged 18 years  
16 and older<sup>18</sup>, it was mainly young people (18 to 39 years) who were underrepresented in the group of respondents  
17 (see Table 1).  
18  
19  
20  
21  
22  
23  
24  
25  
26  
27  
28

### 29 The use of OTC drugs

30 Among the respondents, 83% used OTC medications in the year prior to the questionnaire (see Table 1). Almost  
31 all respondents that had used OTC-drugs in the year prior to the questionnaire, indicated that they had used pain  
32 and antipyretic medicines (97%). Furthermore, 76% of the respondents that had used OTC-drugs in the year prior  
33 to the questionnaire indicated that they had used medicines for coughs, colds, flu and a sore throat.  
34  
35  
36  
37  
38  
39

### 40 Confidence

41 The mean score for consumers' confidence in their own OTC skills was 3.74 (95% CI: 3.69 to 3.79, on a 5-point  
42 Likert scale), indicating that respondents felt quite confident about their own OTC skills. Clearly, the respondents  
43 felt less confident about the OTC skills of others (mean score 2.92 and 95% CI: 2.88 to 2.96).  
44  
45  
46  
47

48 As reflected in Figure 1, seven out of the ten respondents agreed, or strongly agreed, that they are able to make an  
49 appropriate choice between different types and brands of OTC drugs. Only 16% of them thought that others are  
50 able to make an appropriate choice. Furthermore, 65% of the respondents agreed, or strongly agreed, that they  
51 know exactly how to use OTC drugs in a safe way, while only 11% of them thought that others know how to use  
52 OTC drugs safely. Lastly, 76% of the respondents agreed, or strongly agreed, that they can easily get the right  
53  
54  
55  
56  
57  
58  
59  
60

1 information when trying to get advice on OTC drugs, compared to 30% of them who believed that others are able  
2 to get the right information.  
3

4 ANOVAs and t-tests showed significant but modest differences between consumers' confidence in their own OTC  
5 skills and gender, age, level of education and whether they work(ed) or never worked in healthcare. Women felt  
6 slightly more confident about their own OTC skills than men. Furthermore, the elderly ( $\geq 65$  years) and people  
7 with a low level of education had slightly less confidence than younger people and people with a middle and high  
8 level of education. People that currently work in healthcare or have worked in healthcare in the past felt slightly  
9 more confident about their own OTC skills than people that never worked in healthcare. In addition, ANOVA  
10 showed that people who had used OTC medications in the year prior to the questionnaire were more confident  
11 about their own OTC skills than those who had not used OTC medications in the year prior to the questionnaire  
12 (mean 3.84 respectively 3.24,  $p < 0.001$ ).  
13  
14  
15  
16  
17  
18  
19  
20  
21  
22  
23

#### 24 **Attitudes towards availability**

25 Table 2 shows that the pharmacy is often mentioned as preferred channel where painkillers with the described  
26 profiles should be available (range 41% to 71%). For five out of the six profiles most respondents preferred that  
27 painkillers with such a profile should be available exclusively in pharmacies. Only 1% to 8% chose supermarkets  
28 or petrol stations as [their](#) preferred option. ANOVAs and t-tests showed significant but modest differences  
29 between consumers' attitudes and age and level of education. Elderly ( $\geq 65$  years) were more restrictive in their  
30 preferences for availability than younger people. Moreover, people with a low level of education were more  
31 restrictive in their preferences than people with a middle and high level of education.  
32

33 The last research question focused on the association between consumers' confidence in their own OTC skills and  
34 their attitudes towards availability (see Table 3). The regression analysis showed that respondents who were more  
35 confident about their own OTC skills preferred OTC painkillers to be more generally available. This association  
36 was observed in addition to the effects of age and the level of education already mentioned. The association  
37 between own OTC skills and attitudes towards availability was also found when we performed an additional  
38 regression analysis, in which we used the total number of times respondents scored the options 'pharmacy only'  
39 and 'prescription only' as a dependent variable.  
40  
41  
42  
43  
44  
45  
46  
47  
48  
49  
50  
51  
52  
53  
54

## 55 **DISCUSSION**

### 56 **Principal findings**

1 Consumers feel confident about their own OTC skills, but they have less confidence in the OTC skills of others.  
2  
3 In other words, consumers presume that, compared to themselves, other people are less able to use self-medication  
4 appropriately. Although consumers are confident, they are conservative in their attitudes towards the general  
5 availability of OTC painkillers. Most consumers prefer that painkillers with the described profiles (e.g.  
6 paracetamol and ibuprofen) should be available in pharmacies exclusively. Currently, painkillers with profiles  
7 similar to those described are available for general sale in most European countries, including the Netherlands.  
8  
9 Finally, we observed that more confident consumers preferred OTC painkillers to be more generally available.  
10  
11  
12  
13  
14  
15  
16

### 17 **Comparisons with other studies**

18  
19 There appears to be a discrepancy between our findings on the public perception about their own OTC skills and  
20 earlier research on- the public awareness, perception and knowledge of OTC medication. While our study showed  
21 that consumers have high confidence in their own skills, previous studies found that, consumers are unaware of  
22 the fact that OTC medications can cause adverse events when used with other medications <sup>5;23</sup> and also of the  
23 toxicities of OTC medications <sup>4;14</sup>. Neither do they know, or are concerned, about the potential side effects of  
24 OTC analgesics <sup>13;14</sup>. They perceive OTC drugs as safe <sup>14;15</sup> and “too weak to cause any real harm” <sup>6</sup>. In addition, a  
25 recent study in Australia observed that fewer people are using NSAIDs appropriately according to the label, since  
26 ibuprofen has become available outside the pharmacy <sup>16</sup>. Summarized, while previous studies show that  
27 consumers seem to be unaware of how to use OTC medications appropriately our study shows that consumers are  
28 convinced they know how to use OTC medications appropriately. Yet, the confidence consumers have in the skills  
29 of others seems more consistent with the literature. It also probably better connects to reality, since, in general, the  
30 estimates of consumers regarding their peers’ attitudes and behaviours tend to be roughly accurate <sup>17</sup>. Moreover,  
31 the confidence consumers have in the skills of others is in line with their attitudes towards availability of OTC  
32 painkillers. It appears that consumers have taken into account in their attitudes the confidence, or lack of it, that  
33 they have in the OTC skills of others. The assumption of the Dutch government that consumers prefer a less  
34 restrictive availability is not supported by our findings when consumers are confronted with safety information on  
35 medication. Nevertheless, in many countries an increasing number of drugs that were previously only available on  
36 prescription have been switched to OTC status <sup>2;8;9</sup>.  
37  
38  
39  
40  
41  
42  
43  
44  
45  
46  
47  
48  
49  
50  
51  
52  
53  
54  
55

### 56 **Implications**

1 Confidence in self-medication does not imply that the use of OTC medications is always optimal or appropriate  
2  
3  
4  
5  
6  
7  
8  
9  
10  
11  
12  
13  
14  
15  
16  
17  
18  
19  
20  
21  
22  
23  
24  
25  
26  
27  
28  
29  
30  
31  
32  
33  
34  
35  
36  
37  
38  
39  
40  
41  
42  
43  
44  
45  
46  
47  
48  
49  
50  
51  
52  
53  
54  
55  
56  
57  
58  
59  
60

Confidence in self-medication does not imply that the use of OTC medications is always optimal or appropriate  
24. The difference between consumers' confidence in their own skills compared to those of others indicate that some OTC users may be overconfident of their own OTC skills. This view is supported by the fact that consumers would like to limit the availability of OTC drugs with profiles that match currently widely available OTC drugs. This suggests that not all consumers are able to comprehend the proper use of OTC drugs which may entail health risks. For example, Leendertse et al. (2008)<sup>25</sup> observed that NSAIDs (amongst which also OTC drugs) are one of the medicines associated most often with potentially preventable medication-related hospital admissions. Moreover, Pirmohamed (2004)<sup>26</sup> observed that, among others, NSAIDs were most commonly implicated in admissions related to adverse drug reactions. Furthermore, a Dutch study showed that during the last decade there had been an increase in requests on paracetamol poisoning to the National Poisons Information Center<sup>27</sup>. There also have been some concerns regarding switching the status of prescription drugs to OTC availability. Examples of such concerns are an inaccurate diagnosis by patients and delay in obtaining medical assistance<sup>28</sup>. We were unable to link our results to the actual self-medication behaviour of the respondents. Therefore, further research is recommended to examine this.

29  
30  
31  
32  
33  
34  
35  
36  
37  
38  
39  
40  
41  
42  
43  
44  
45  
46  
47  
48  
49  
50  
51  
52  
53  
54  
55  
56  
57  
58  
59  
60

The fact that inappropriate use of medication entails health risks led to recommendations to increase the risk awareness and knowledge among the public, and to educate them about OTC medication and its potential risks<sup>6;13;14;16;29</sup>. The question is whether people are either unable to understand and find the correct information, or whether they do not want, read, search or ask for this information. Therefore, it is not clear yet, how to increase public awareness. What seems clear is that consumers consider pharmacies as a safe environment, since most of them prefer the painkillers described to be available in pharmacies exclusively. This is [confirmed-similar to findings of](#) an earlier study where was found that Dutch consumers consider pharmacists as the most reliable source of information regarding OTC medication<sup>30</sup>. Although Dutch consumers expect to be provided with reliable information from pharmacies, it is possible that there are differences between pharmacies with regards to the quality of their advice. Furthermore, in 2010, 88% of the Dutch adult population put much or very much trust in pharmacists<sup>31</sup>. As a result, pharmacists can have an important role in questioning and informing patients about OTC medications.

#### **The strengths and limitations of the study**

This study addresses a relatively unexplored area. An important strength of our study is the large sample size and the response rate of almost 70%. However, the respondents in our study are not fully representative of the adult



1 Dutch population aged 18 plus. Therefore, we performed analyses to see whether there are differences between  
2 groups of consumers. We observed some small but significant differences. However, they do not appear to affect  
3 our conclusions. We included an indirect measurement of the concept ‘attitudes towards availability’ in our  
4 questionnaire instead of asking directly where certain specific OTC painkillers should be available. Earlier  
5 research in the Netherlands demonstrated that when trade names of painkillers are presented to consumers, they  
6 judge them as safe. More than 95%, respectively 70%, of the consumers considered paracetamol and ibuprofen as  
7 safe, or very safe<sup>32</sup>. Unfortunately, we did not include direct as well as indirect measurements in our  
8 questionnaire, as we are now not able to make a comparison between both measurements. We also did not provide  
9 information on the pack sizes/quantity in the questionnaire. Providing such information might influence the  
10 attitudes towards availability of the respondents. It could, for example, be assumed that consumers prefer a more  
11 restrictive availability for larger pack sizes of OTC medicines. Another possible limitation might be that the study  
12 only relates to painkillers, albeit those are the most used OTCs in the Netherlands. Furthermore, we did not  
13 include internet as a channel in our questionnaire, because this study was part of a policy evaluation in which only  
14 the official Dutch sales channels were evaluated. With the increasing growth of internet pharmacy, it would be  
15 interested to include this channel in further research. Another possible limitation is that we excluded quite a  
16 considerable number of respondents (N=228), because they did not fill out all six safety profiles. The excluded  
17 respondents were more restrictive in their preferences, possibly implying a slight underestimation of the observed  
18 effects in our analyses. [Finally, a possible limitation is that we were not able to conduct a pilot study due to time  
19 constraints. By performing a pilot study some issues could have been identified and addressed from the onset to  
20 improve the questionnaire.](#)

## 21 Conclusions

22 This study aimed to examine consumers’ confidence in OTC skills and their attitudes towards the availability of  
23 OTC painkillers. The Dutch government assumed that consumers are well-informed, know how to use OTC  
24 medications appropriately, and prefer a wider availability. It could be questioned whether these assumptions are  
25 true. Consumers feel confident about their own OTC skills; however, they would prefer painkillers with safety  
26 profiles resembling currently available OTC painkillers, to be available as OTC in pharmacies exclusively.  
27 Furthermore, the confidence consumers have in the OTC skills of others seems more consistent with their  
28 attitudes towards availability. Until consumers themselves realise they are also one of the others, they may  
29 overestimate their OTC skills, which may entail health risks.



**Footnotes**

We thank the panel members of the Dutch Health Care Consumer Panel who participated in this study.

Preliminary results of part of this manuscript were presented at the 4<sup>th</sup> European Public Health Conference:

‘Public Health and Welfare – Welfare Development and Public Health’ from 9 to 12 November 2011,

Copenhagen. An abstract is available in the European Journal of Public Health, 21 (2011) suppl. 1, p 129.

Contributors: The study was devised and designed by LVD and MB. JDJ was responsible for the data collection in the Dutch Health Care Consumer Panel. AB performed the statistical analyses and drafted the manuscript. All other authors critically revised it. All authors gave their final approval for the manuscript version to be published. All authors are responsible for the overall content as guarantors.

Funding: Data collection of this study was funded by the Dutch Ministry of Health, Welfare and Sport. The funder had no role in the design, execution, and writing of the study.

Competing interests: All authors have completed the Unified Competing Interest form at [www.ijemje.org/coi\\_disclosure.pdf](http://www.ijemje.org/coi_disclosure.pdf) (available on request from the corresponding author) and declare: the authors received support for the data collection from the Dutch Ministry of Health, Welfare and Sport for the work submitted. AB and JDJ there was no financial relationship with any organisations that might have an interest in the submitted work in the previous three years. LVD received unrestricted grants from Bristol-Myers Squibb and Astra Zeneca for studies not related to this study in 2011 and 2012. MB performed occasional consultancy work for both organisations of pharmacists, druggists and government. And all authors that there was no other relationships or activities that could appear to have influenced the submitted work.

Ethical approval: According to the Dutch law, no ethical approval was needed. The protection of the collected data is registered with the Dutch Data Protection Authority (nr. 1262949).

Data sharing: Data is available on request and subject to approval by the programme committee of the Dutch Health Care Consumer Panel. The questionnaire (in Dutch) is available on request from the authors.

Exclusive licence: The Corresponding Author has the right to grant on behalf of all authors and does grant on behalf of all authors, an exclusive licence (or non exclusive for government employees) on a worldwide basis to the BMJ Publishing Group Ltd and its Licensees to permit this article (if accepted) to be published in BMJ editions and any other BMJ PGL products and sublicences to exploit all subsidiary rights, as set out in our licence.

## Reference List

- 1  
2  
3  
4 (1) Barber N. Drugs: from prescription only to pharmacy only. *BMJ* 1993; 307(6905):640.
- 5  
6 (2) Blenkinsopp A, Bradley C. Patients, society, and the increase in self medication. *BMJ* 1996;  
7  
8 312(7031):629-632.
- 9  
10 (3) Schoenemann JH, Muller-Oerlinghausen B, Munter KH, Enayati-Kashani S. Adverse drug  
11  
12 reactions (ADR) causing hospital admissions. *Pharmacoepidemiol Drug Saf* 1998; 7 Suppl 1:S1-  
13  
14 S3.
- 15  
16 (4) Huott MA, Storrow AB. A survey of adolescents' knowledge regarding toxicity of over-the-  
17  
18 counter medications. *Acad Emerg Med* 1997; 4(3):214-218.
- 19  
20 (5) Fendrick AM, Pan DE, Johnson GE. OTC analgesics and drug interactions: clinical implications.  
21  
22 *Osteopath Med Prim Care* 2008; 2:2.
- 23  
24 (6) Roumie CL, Griffin MR. Over-the-counter analgesics in older adults: a call for improved labelling  
25  
26 and consumer education. *Drugs Aging* 2004; 21(8):485-498.
- 27  
28 (7) Sheen CL, Dillon JF, Bateman DN, Simpson KJ, Macdonald TM. Paracetamol toxicity:  
29  
30 epidemiology, prevention and costs to the health-care system. *QJM* 2002; 95(9):609-619.
- 31  
32 (8) Hanna LA, Hughes CM. Public's views on making decisions about over-the-counter medication  
33  
34 and their attitudes towards evidence of effectiveness: a cross-sectional questionnaire study. *Patient*  
35  
36 *Educ Couns* 2011; 83(3):345-351.
- 37  
38 (9) Francis SA, Barnett N, Denham M. Switching of prescription drugs to over-the-counter status: is it  
39  
40 a good thing for the elderly? *Drugs Aging* 2005; 22(5):361-370.
- 41  
42 (10) US Government Accountability Office. Nonprescription drugs: Considerations regarding a behind-  
43  
44 the-counter drug class. Washington: 2009.
- 45  
46 (11) Van Dijk L, Van der Maat M, Salimans R, Bouvy M. De balans tussen verkrijgbaarheid en  
47  
48 veiligheid. Evaluatie van de indeling van zelfzorggeneesmiddelen en de rol van drogist en  
49  
50 apotheek bij de verstrekking. Utrecht: NIVEL; 2010.
- 51  
52 (12) Van Dijk L, Vervloet M, Plas M, Breuning E, Van den Ende E. Negatieve effecten van normaal en  
53  
54 verkeerd gebruik van geneesmiddelen. Een literatuurstudie. Utrecht: NIVEL; 2005.
- 55  
56 (13) Cham E, Hall L, Ernst AA, Weiss SJ. Awareness and use of over-the-counter pain medications: a  
57  
58 survey of emergency department patients. *South Med J* 2002; 95(5):529-535.
- 59  
60

- 1  
2  
3  
4  
5  
6  
7  
8  
9  
10  
11  
12  
13  
14  
15  
16  
17  
18  
19  
20  
21  
22  
23  
24  
25  
26  
27  
28  
29  
30  
31  
32  
33  
34  
35  
36  
37  
38  
39  
40  
41  
42  
43  
44  
45  
46  
47  
48  
49  
50  
51  
52  
53  
54  
55  
56  
57  
58  
59  
60
- (14) Wilcox CM, Cryer B, Triadafilopoulos G. Patterns of use and public perception of over-the-counter pain relievers: focus on nonsteroidal antiinflammatory drugs. *J Rheumatol* 2005; 32(11):2218-2224.
- (15) Clark D, Layton D, Shakir SA. Monitoring the safety of over the counter drugs. We need a better way than spontaneous reports. *BMJ* 2001; 323(7315):706-707.
- (16) Stosic R, Dunagan F, Palmer H, Fowler T, Adams I. Responsible self-medication: perceived risks and benefits of over-the-counter analgesic use. *Int J Pharm Pract* 2011; 19(4):236-245.
- (17) Balcetis E, Dunning D. Considering the situation: Why people are better social psychologists than self-psychologists. *Self and Identity* 2011.
- (18) Brabers AEM, Reitsma-van Rooijen M, De Jong JD. Consumentenpanel Gezondheidszorg. Basisrapport met informatie over het panel (2012). Utrecht: NIVEL; 2012.
- (19) Reitsma-van RM, de Jong JD, Rijken M. Regulated competition in health care: switching and barriers to switching in the Dutch health insurance system. *BMC Health Serv Res* 2011; 11:95.
- (20) de Jong JD, Brink-Muinen A, Groenewegen PP. The Dutch health insurance reform: switching between insurers, a comparison between the general population and the chronically ill and disabled. *BMC Health Serv Res* 2008; 8:58.
- (21) Singh G. Gastrointestinal complications of prescription and over-the-counter nonsteroidal anti-inflammatory drugs: a view from the ARAMIS database. Arthritis, Rheumatism, and Aging Medical Information System. *Am J Ther* 2000; 7(2):115-121.
- (22) Butt JH, Barthel JS, Moore RA. Clinical spectrum of the upper gastrointestinal effects of nonsteroidal anti-inflammatory drugs. Natural history, symptomatology, and significance. *Am J Med* 1988; 84(2A):5-14.
- (23) Indermitte J, Reber D, Beutler M, Bruppacher R, Hersberger KE. Prevalence and patient awareness of selected potential drug interactions with self-medication. *J Clin Pharm Ther* 2007; 32(2):149-159.
- (24) Hughes CM, McElnay JC, Fleming GF. Benefits and risks of self medication. *Drug Saf* 2001; 24(14):1027-1037.

- 1  
2  
3  
4  
5  
6  
7  
8  
9  
10  
11  
12  
13  
14  
15  
16  
17  
18  
19  
20  
21  
22  
23  
24  
25  
26  
27  
28  
29  
30  
31  
32  
33  
34  
35  
36
- (25) Leendertse AJ, Egberts AC, Stoker LJ, van den Bemt PM. Frequency of and risk factors for preventable medication-related hospital admissions in the Netherlands. *Arch Intern Med* 2008; 168(17):1890-1896.
- (26) Pirmohamed M, James S, Meakin S, Green C, Scott AK, Walley TJ et al. Adverse drug reactions as cause of admission to hospital: prospective analysis of 18 820 patients. *BMJ* 2004; 329(7456):15-19.
- (27) Van Dijk L, Van der Maat M, Bouvy M. Zelfzorggeneesmiddelen: actieve voorlichting over zelfzorg nodig. Aantal paracetamolvergiftigingen gestegen. *Pharmaceutisch Weekblad* 2010; 146(51-52):18-20.
- (28) Brass EP. Changing the status of drugs from prescription to over-the-counter availability. *N Engl J Med* 2001; 345(11):810-816.
- (29) Calamusa A, Di MA, Cristofani R, Arrighetti P, Santaniello V, Alfani S et al. Factors that influence Italian consumers' understanding of over-the-counter medicines and risk perception. *Patient Educ Couns* 2012; 87(3):395-401.
- (30) Brinkman A.C.A., Vervloet M, Van Dijk, Dute J.C.J., Kabel J.J.C., Friele R.D. Evaluatie reclamebesluit geneesmiddelen. 2008.
- (31) Brabers AEM, Reitsma-van Rooijen M, De Jong JD. Barometer Vertrouwen in de gezondheidszorg. 14-8-2013. [www.nivel.nl/consumentenpanel-gezondheidszorg](http://www.nivel.nl/consumentenpanel-gezondheidszorg).

37 Ref Type: Online Source

- 38  
39  
40  
41  
42  
43  
44  
45  
46  
47  
48  
49  
50  
51  
52  
53  
54  
55  
56  
57  
58  
59  
60
- (32) TNS/Nipo. Advisering bij zelfzorgeneesmiddelen in drogisterijen. Amsterdam: 2010.

## Tables and figures

Table 1: Demographic characteristics of the respondents and the Dutch population aged 18 years and older

|                                                        | Respondents |      | Dutch population aged 18 years and older* |      |
|--------------------------------------------------------|-------------|------|-------------------------------------------|------|
|                                                        | N           | %    | %                                         |      |
| <b>Gender</b>                                          | <b>972</b>  |      |                                           |      |
| Male                                                   | 424         | 43.6 | 49.0                                      |      |
| Female                                                 | 548         | 56.4 | 51.0                                      |      |
| <b>Age</b>                                             | <b>972</b>  |      |                                           |      |
| 18-39 years                                            | 88          | 9.1  | 35.3                                      |      |
| 40-64 years                                            | 527         | 54.2 | 45.3                                      |      |
| 65 years and older                                     | 357         | 36.7 | 19.5                                      |      |
| <b>Education</b>                                       | <b>948</b>  |      |                                           |      |
| Low (none, primary school or pre-vocational education) | 184         | 19.4 | 33.8                                      |      |
| Middle (secondary or vocational education)             | 448         | 47.3 | 40.5                                      |      |
| High (professional higher education or university)     | 316         | 33.3 | 25.7                                      |      |
| <b>Self-reported general health</b>                    | <b>965</b>  |      |                                           |      |
| Poor/ <a href="#">bad/fair</a>                         | 175         | 18.1 | Less than good**                          | 18.6 |
| Good                                                   | 487         | 50.5 | Good                                      | 52.7 |
| Excellent/very good                                    | 303         | 31.4 | Very good                                 | 28.8 |
| <b>Working in healthcare</b>                           | <b>919</b>  |      |                                           |      |
| No, never worked in healthcare                         | 663         | 72.1 | Not available                             |      |
| Yes, I am currently working in healthcare              | 119         | 13.0 | Not available                             |      |
| Yes, I have worked in healthcare in the past           | 137         | 14.9 | Not available                             |      |

| Use of OTC drugs in the year prior to the questionnaire | 960 |      |               |
|---------------------------------------------------------|-----|------|---------------|
| No                                                      | 160 | 16.7 | Not available |
| Yes                                                     | 800 | 83.3 | Not available |

\* Data of the Dutch population aged 18 years and older is based on information from Statistics Netherland.

\*\* Statistics Netherlands has three categories of self-reported general health. The percentage of Statistics Netherlands relate to the overall health of the entire general population, including those under 18 years.

Table 2: Percentage of respondents that prefer a specific channel with regards to the availability of OTC painkillers

| Safety profiles*                                                                                                                               | N   | Percentage of respondents that prefer a channel |         |                  |                      | Mean score **<br>(95% CI)     |
|------------------------------------------------------------------------------------------------------------------------------------------------|-----|-------------------------------------------------|---------|------------------|----------------------|-------------------------------|
|                                                                                                                                                |     | Supermarket/<br>petrol station                  | Chemist | Pharmacy<br>only | Prescription<br>only |                               |
| Safe when used normally, but potentially serious side effects when used in combination with certain prescription drugs                         | 876 | 1.1                                             | 7.4     | 70.8             | 20.7                 | <b>3.11</b><br>(3.07 to 3.15) |
| Can be used safely by most people, but potentially serious side effects when used by elderly people and those with severe concomitant diseases | 875 | 1.0                                             | 12.6    | 65.3             | 21.1                 | <b>3.07</b><br>(3.02 to 3.11) |
| Can be used safely by most people, but potentially serious side effects when used by children                                                  | 859 | 2.2                                             | 18.6    | 59.6             | 19.6                 | <b>2.97</b><br>(2.92 to 3.01) |
| In rare cases (less than 1 per 1,000) people suffer serious side effects, like gastrointestinal bleedings                                      | 848 | 3.5                                             | 25.4    | 52.7             | 18.4                 | <b>2.86</b><br>(2.81 to 2.91) |
| No side effects when used as directed, but taking too many tablets can cause serious damage                                                    | 813 | 8.1                                             | 34.0    | 46.0             | 11.9                 | <b>2.62</b><br>(2.56 to 2.67) |
| Mild side effects, such as stomach and intestinal problems, but never serious side effects                                                     | 841 | 4.8                                             | 45.3    | 40.7             | 9.3                  | <b>2.54</b><br>(2.50 to 2.59) |

\* Safety profiles are ordered based on their mean score. In the questionnaire, they were ordered in another way.

\*\* Ranging from 1 to 4 (1 = wide availability; 4 = restrictive availability).

Table 3: Regression model for attitudes towards availability (N=672)

|                                                                                                                              | Beta*           | P-value      |
|------------------------------------------------------------------------------------------------------------------------------|-----------------|--------------|
| <b>Availability</b> (1= wide; 4 = restrictive)                                                                               |                 |              |
| <b>Confidence</b> (1 = low; 5 = high)                                                                                        | -0.114          | <b>0.005</b> |
| <b>Gender</b> (0 = man; 1 = woman)                                                                                           | 0.010           | 0.807        |
| <b>Age</b>                                                                                                                   | 0.102           | <b>0.012</b> |
| <b>Level of education</b>                                                                                                    |                 |              |
| -Low                                                                                                                         | reference level |              |
| -Middle                                                                                                                      | -0.118          | <b>0.024</b> |
| -High                                                                                                                        | -0.242          | <b>0.000</b> |
| <b>Self-reported general health</b>                                                                                          |                 |              |
| <del>Bad</del> Poor/fair/ <del>poor</del>                                                                                    | reference level |              |
| -Good                                                                                                                        | 0.028           | 0.599        |
| -Excellent/very good                                                                                                         | -0.011          | 0.838        |
| <b>Work in healthcare</b> (0 = never worked in healthcare; 1 = currently working in healthcare/worked in healthcare in past) | -0.038          | 0.358        |
| <b>Use of OTC drugs in year prior to questionnaire</b> (0 = no; 1 = yes)                                                     | -0.010          | 0.813        |
| <b>Constant</b>                                                                                                              | .               | <b>0.000</b> |

Adjusted R-square: 0.07

\* Standardized coefficients



1  
2  
3  
4  
5  
6  
7  
8  
9  
10  
11  
12  
13  
14  
15  
16  
17  
18  
19  
20  
21  
22  
23  
24  
25  
26  
27  
28  
29  
30  
31  
32  
33  
34  
35  
36  
37  
38  
39  
40  
41  
42  
43  
44  
45  
46  
47  
48  
49

Figure 1: Consumers' confidence in their own OTC skills and in the OTC skills of others



**Choosing:** I am / others are able to make an appropriate choice between different types and brands of OTC drugs

**Using:** I / others know exactly how to use OTC drugs in a safe way

**Obtaining information on:** When I / others try to get advice on OTC drugs, I / others can easily get the right information
